# Supplementary material
Source: PubMed Central journal article supplement (PMC7771244)
Supplement: NIHMS1655445-supplement-Protein_binding_experiments__peptide_characterization__and_crystallography_methods.pdf [file NIHMS1655445-supplement-Protein_binding_experiments__peptide_characterization__and_crystallography_methods.pdf]

# Supporting Information

## NMR Analyses of Acetylated H2AZ Isoforms Identify Differential Binding Interactions with the Bromodomain of the NURF Nucleosome Remodeling Complex

Noelle M. Olson<sup>1</sup>, Samantha Kroc<sup>1</sup>, Jorden A. Johnson<sup>1</sup>, Huda Zahid<sup>1</sup>, Peter D. Ycas<sup>1</sup>, Alice Chan<sup>2</sup>, Jennifer Kimbrough<sup>1</sup>, Prakriti Kalra<sup>1</sup>, Ernst Schönbrunn<sup>2</sup>, William C. K. Pomerantz<sup>\*,1</sup>

<sup>1</sup>Department of Chemistry, University of Minnesota, 207 Pleasant St. SE, Minneapolis, Minnesota, 55455, United States

<sup>2</sup>Drug Discovery Department, H. Lee Moffitt Cancer Center and Research Institute, 12902 Magnolia Drive, Tampa, Florida 33612, United States

\*William Pomerantz email address: wcp@umn.edu

| <b>Table of Contents</b>                                                 | <b>Page</b> |
|--------------------------------------------------------------------------|-------------|
| Methods: Protein Purification                                            | S2          |
| Methods: His <sub>6</sub> -BPTF Protein Purification for Crystallography | S3          |
| Methods: Crystallization and Structure Determination                     | S3          |
| Figure S1: Sequence Alignment of H2A.Z I, H2A.Z I II, and H2A            | S4          |
| Figure S2: Representative MALDI-TOF MS Spectra of H2A.Z II K7ac,K13ac    | S5          |
| Table S1: Peptide theoretical and observed masses using MALDI-TOF MS.    | S5-7        |
| Figure S3: Representative LC/MS Spectra of 5FW-BPTF                      | S7          |
| Table S2: LC/MS Characterization of Proteins                             | S8          |
| Figure S4: Assignment of BRD2(1) Resonances                              | S8          |
| Figure S5: SPR Sensorgram with GST-BPTF and H2A.Z II K7ac,K13ac          | S9          |
| Figure S6: AlphaScreen competition with His <sub>9</sub> BPTF            | S9          |
| Figure S7: X-ray Crystallography                                         | S10         |
| Table S3: Crystallography Statistics                                     | S11         |

|                                                                                                       |        |
|-------------------------------------------------------------------------------------------------------|--------|
| Figure S8: <sup>1</sup> H CPMG with BPTF and H2A.Z I K7ac, K13ac and Increasing Protein Concentration | S12    |
| Figure S9: <sup>1</sup> H CPMG Competition with BPTF and H2A.Z I K7ac-d <sub>3</sub> , K13ac          | S13    |
| Figure S10: <sup>1</sup> H CPMG with CECR2 and H2A.Z II K7ac, K13ac                                   | S13    |
| Synthesis of TP-238                                                                                   | S14-21 |
| HPLC Purity Traces of Peptides                                                                        | S22-32 |
| PrOF NMR Titrations with 5FW-BPTF                                                                     | S33-61 |
| Bromodomain Scope PrOF NMR Titrations                                                                 | S62-75 |
| References                                                                                            | S76    |

**Methods: Protein Purification.** To the cell pellet was added 40 mL of lysis buffer (50 mM phosphate, 300 mM NaCl, pH 7.4) and 20 mg phenylmethanesulfonyl fluoride (PMSF) and the mixture was allowed to thaw at room temperature for 30 minutes. Cells were put on ice and sonicated in 30 second intervals followed by 60 seconds of cooling for a total of 12 minutes sonication time. The lysed cells were centrifuged at 10,000 g for 30 minutes. The supernatant was decanted from the pelleted cell debris and filtered using Whatman filters. Ni affinity purification was done using a Ni HisTrap FF 5 mL column (GE Healthcare) on an AKTA Fast Protein Liquid Chromatography (FPLC) system by monitoring the absorbance at 280 nm. Proteins were eluted with a 0-100% gradient of wash buffer (50 mM phosphate, 100 mM NaCl, 40 mM imidazole, pH 7.4) and elution buffer (50 mM phosphate, 100 mM NaCl, 400 mM imidazole, pH 7.4) across 20 column volumes. Purified protein was then buffer exchanged into storage buffer (50 mM Tris, 100 mM NaCl, pH 7.4 or 50 mM HEPES, 100 mM NaCl, pH 7.4) using a HiPrep desalting column (GE Healthcare) equilibrated with 1 column volume of buffer. The hexahistidine tag was removed by adding Tobacco Etch Virus (TEV) protease and incubating for 4-16 hours at 4°C. Nickel NTA affinity resin was added, incubated for 2-24 hours at 4°C, then filtered to remove the TEV. Protein purity was assessed using SDS-polyacrylamide gel electrophoresis (12% Bis-Tris, 1.0 mM gels.

Running conditions: 120 V, 90 minutes in MES buffer). Protein was concentrated to ~50  $\mu$ M using Amicon Ultra-15 (Millipore) centrifugal filters with a 3 kDa molecular weight cut off (MWCO = 3000 Da), flash frozen and stored at -20°C. Quadrupole Time-of-Flight (Q-TOF) LC/MS was used to confirm the identity of the protein and determine percent fluorine incorporation using the following equation.

$$\% \text{ Incorporation} = \frac{(0F \text{ protein} * 0) + (1F \text{ protein} * 1) + \dots + (nF \text{ protein} * n)}{(0F \text{ protein} * n) + (1F \text{ protein} * n) + \dots + (nF \text{ protein} * n)} * 100$$

Protein masses and fluorine incorporation are shown in Table S2.

**Methods: His<sub>6</sub>-BPTF Protein Purification for Crystallography.** Protein purification was performed at 4 °C by FPLC using columns and chromatography resins from GE Healthcare. Cell pellets were re-suspended in 50 mM Na/K Phosphate buffer (pH 7.4) containing 100 mM NaCl, 20 mM imidazole, 0.01% w/v lysozyme, 0.01% v/v Triton X-100 and 1mM DTT. Cells were lysed using a homogenizer, the lysate was clarified by centrifugation and subjected to purification on immobilized Ni<sup>2+</sup>-affinity chromatography (Qiagen) using a linear gradient of 20 – 500 mM imidazole. Fractions containing BPTF were pooled and incubated overnight with TEV protease at 4 °C. Cleaved BPTF was subjected to a second Ni<sup>2+</sup>-affinity chromatography run to remove His-TEV and the cleaved His-tag. The flow-through containing BPTF was concentrated and purified to homogeneity by size exclusion chromatography using a Superdex Hiload 26/60 column. Protein was eluted using 50 mM Tris/HCl (pH 8.0) containing 100 mM NaCl and 1 mM DTT. Peak fractions were combined, concentrated to 5 mg/mL, flash-frozen in liquid N<sub>2</sub> and stored at -80 °C.

**Methods: Crystallization and Structure Determination.** Crystallization screening campaigns were performed at 18 °C with precipitant solutions from Hampton Research using a Mosquito liquid handler (TTP Labtech). Robust crystallization conditions were established using 25% PEG

3,350, 0.2 M lithium sulfate monohydrate, 0.1 M Bis-Tris pH 6.5 mixed with an equal volume of protein in hanging droplets. H2A.Z peptides were co-crystallized with BPTF at 1 mM final concentration. Crystals were cryoprotected by addition of 20% ethylene glycol in the precipitant and flash-frozen in liquid N<sub>2</sub>. During data collection, crystals were maintained under a constant stream of N<sub>2</sub> gas. X-ray diffraction data were recorded at beamlines 22-ID and 22-BM hosted by Ser-Cat of Argonne National Laboratories. Data were indexed and scaled with XDS<sup>1</sup>. Phasing and refinement was performed using PHENIX<sup>2</sup> and model building with Coot<sup>3</sup>. PDB entry 3UV2 served as the search model for molecular replacement. Initial models for small molecule ligands were generated through MarvinSketch (ChemAxon, Cambridge, MA) and ligands restraints through eLBOW of the PHENIX suite. All structures have been validated by MolProbity. Figures were prepared using PyMOL (Schrödinger, LLC).

### Sequence Alignment of H2A.Z I, H2A.Z I II, and H2A

|           |                                                                                       |
|-----------|---------------------------------------------------------------------------------------|
| H2A.Z I:  | AGGKAGKDSGKAKTKAVSRSQRAGLQFPVGR <sup>I</sup> HRHLK <sup>S</sup> RTTSHGRVGATAAVYSAAILE |
| H2A.Z II: | AGGKAGKDSGKAKAKAVSRSQRAGLQFPVGR <sup>I</sup> HRHLK <sup>T</sup> RTTSHGRVGATAAVYSAAILE |
| H2A:      | -SGR-GKQGGKTRAKAKTRSSRAGLQFPVGRVHRLLRKGN <sup>Y</sup> AE-RVGAGAPVYLA <sup>V</sup> LE  |

  

YLTAEVLELAGNASKDLKVKRITPRHLQLAIRGDEELDSL<sup>I</sup>-KATIAGGGVIPH<sup>I</sup>HKSLIGKKGQ<sup>Q</sup>-KTV  
 YLTAEVLELAGNASKDLKVKRITPRHLQLAIRGDEELDSL<sup>I</sup>-KATIAGGGVIPH<sup>I</sup>HKSLIGKKGQ<sup>Q</sup>-KTA  
 YLTAE<sup>I</sup>LELAGNA<sup>A</sup>RD<sup>N</sup>KK<sup>T</sup>RI<sup>I</sup>PRHLQLA<sup>V</sup>RNDEELNKL<sup>L</sup>LGRV<sup>T</sup>IAQGGVLPNI<sup>Q</sup>SVLLPKK<sup>T</sup>D<sup>S</sup>SK<sup>S</sup>KAK

**Figure S1:** Sequence alignment of H2A.Z isoforms with canonical H2A. Divergent amino acids between the two isoforms are highlighted in yellow (T14/A14, S38/T38, and V127/A127). Divergent amino acids in the H2A sequence are shown in red. The N-terminal region corresponding to the synthetic peptide sequence used in these experiments is highlighted in blue.

## Representative MALDI-TOF MS Spectra of H2A.Z II K7ac, K13ac

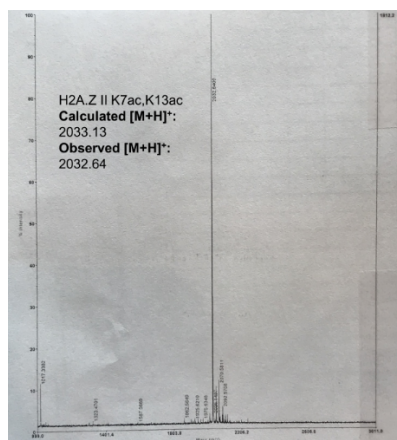

**Figure S2.** Representative MALDI-TOF MS spectra of H2A.Z II K7ac,K13ac showing major peak corresponding to expected  $[M+H]^+$  of the peptide. The masses of each peptide synthesized for these experiments were confirmed using this method.

**Table S1: Peptide theoretical and observed masses using MALDI-TOF MS.**

| Peptide               | Sequence                                                          | Calculated $[M+H]^+$ | Observed $[M+H]^+$ |
|-----------------------|-------------------------------------------------------------------|----------------------|--------------------|
| H4 K16ac              | H <sub>2</sub> N-YSGRGKGGKGLGKGGAKacRHRK<br>C(O)NH <sub>2</sub>   | 2196.27              | 2196.01            |
| H2A.Z II unacetylated | H <sub>2</sub> N-YAGGKAGKDSGKAKAKAVSR-C(O)NH <sub>2</sub>         | 1949.11              | 1949.17            |
| H2A.Z II K4ac         | H <sub>2</sub> N-YAGGKacAGKDSGKAKAKAVSR-C(O)NH <sub>2</sub>       | 1991.12              | 1991.56            |
| H2A.Z II K7ac         | H <sub>2</sub> N-YAGGKAGKacDSGKAKAKAVSR-C(O)NH <sub>2</sub>       | 1991.12              | 1991.41            |
| H2A.Z II K11ac        | H <sub>2</sub> N-YAGGKAGKDSGKacAKAKAVSR-C(O)NH <sub>2</sub>       | 1991.12              | 1991.63            |
| H2A.Z II K13ac        | H <sub>2</sub> N-YAGGKAGKDSGKAKacAKAVSR-C(O)NH <sub>2</sub>       | 1991.12              | 1991.80            |
| H2A.Z II K15ac        | H <sub>2</sub> N-YAGGKAGKDSGKAKAKacAVSR-C(O)NH <sub>2</sub>       | 1991.12              | 1991.40            |
| H2A.Z K4ac,K7ac       | H <sub>2</sub> N-YAGGKacAGKacDSGKAKAKAVSR-<br>C(O)NH <sub>2</sub> | 2033.13              | 2033.25            |
| H2A.Z K4ac,11ac       | H <sub>2</sub> N-YAGGKacAGKDSGKacAKAKAVSR-<br>C(O)NH <sub>2</sub> | 2033.13              | 2032.86            |

|                                         |    |                                                                                    |         |         |
|-----------------------------------------|----|------------------------------------------------------------------------------------|---------|---------|
| H2A.Z<br>K4ac,K13ac                     | II | H <sub>2</sub> N-YAGGKacAGKDSGKAKacAKAVSR-<br>C(O)NH <sub>2</sub>                  | 2033.13 | 2033.31 |
| H2A.Z<br>K4ac,K15ac                     | II | H <sub>2</sub> N-YAGGKacAGKDSGKAKAKacAVSR-<br>C(O)NH <sub>2</sub>                  | 2033.13 | 2032.91 |
| H2A.Z<br>K7ac,K11ac                     | II | H <sub>2</sub> N-YAGGKAGKacDSGKAKacAKAVSR-<br>C(O)NH <sub>2</sub>                  | 2033.13 | 2033.13 |
| H2A.Z<br>K7ac,K13ac                     | II | H <sub>2</sub> N-YAGGKAGKacDSGKAKacAKAVSR-<br>C(O)NH <sub>2</sub>                  | 2033.13 | 2032.64 |
| H2A.Z II K7ac-<br>d <sub>3</sub> ,K13ac |    | H <sub>2</sub> N-YAGGKAGKac(d <sub>3</sub> )DSGKAKacAKAVSR-<br>C(O)NH <sub>2</sub> | 2036.13 | 2036.37 |
| H2A.Z<br>K7ac,K15ac                     | II | H <sub>2</sub> N-YAGGKAGKacDSGKAKAKacAVSR-<br>C(O)NH <sub>2</sub>                  | 2033.13 | 2033.51 |
| H2A.Z<br>K11ac,K13ac                    | II | H <sub>2</sub> N-YAGGKAGKDSGKacAKacAKAVSR-<br>C(O)NH <sub>2</sub>                  | 2033.13 | 2032.46 |
| H2A.Z<br>K11ac,K15ac                    | II | H <sub>2</sub> N-YAGGKAGKDSGKacAKAKacAVSR-<br>C(O)NH <sub>2</sub>                  | 2033.13 | 2032.49 |
| H2A.Z<br>K13ac,K15ac                    | II | H <sub>2</sub> N-YAGGKAGKDSGKAKacAKacAVSR-<br>C(O)NH <sub>2</sub>                  | 2033.13 | 2032.71 |
| H2A.Z<br>K4ac,K7ac,K11ac                | II | H <sub>2</sub> N-YAGGKacAGKacDSGKacAKAKAVSR-<br>C(O)NH <sub>2</sub>                | 2075.14 | 2074.71 |
| H2A.Z<br>K7ac,K13ac,K15ac               | II | H <sub>2</sub> N-YAGGKAGKacDSGKAKacAKacAVSR-<br>C(O)NH <sub>2</sub>                | 2075.14 | 2075.62 |
| H2A.Z<br>K4me,K7ac,K13ac                | II | H <sub>2</sub> N-YAGGKmeAGKacDSGKAKacAKAVSR-<br>C(O)NH <sub>2</sub>                | 2048.13 | 2047.22 |
| H2A.Z<br>K4ac,K11ac                     | I  | H <sub>2</sub> N-YAGGKacAGKDSGKacAKTKAVSR-<br>C(O)NH <sub>2</sub>                  | 2063.14 | 2063.13 |
| H2A.Z<br>K4ac,K13ac                     | I  | H <sub>2</sub> N-YAGGKacAGKDSGKAKacTKAVSR-<br>C(O)NH <sub>2</sub>                  | 2063.14 | 2062.96 |
| H2A.Z<br>K4ac,K15ac                     | I  | H <sub>2</sub> N-YAGGKacAGKDSGKAKTKacAVSR-<br>C(O)NH <sub>2</sub>                  | 2063.14 | 2063.65 |
| H2A.Z<br>K7ac,K13ac                     | I  | H <sub>2</sub> N-YAGGKAGKacDSGKAKacTKAVSR-<br>C(O)NH <sub>2</sub>                  | 2063.14 | 2063.02 |

|                           |   |                                                                     |         |         |
|---------------------------|---|---------------------------------------------------------------------|---------|---------|
| H2A.Z<br>K7ac,K15ac       | I | H <sub>2</sub> N-YAGGKAGKacDSGKAKTKacAVSR-<br>C(O)NH <sub>2</sub>   | 2063.14 | 2062.82 |
| H2A.Z<br>K11ac,K13ac      | I | H <sub>2</sub> N-YAGGKAGKDSGKacAKacTKAVSR-<br>C(O)NH <sub>2</sub>   | 2063.14 | 2062.70 |
| H2A.Z<br>K11ac,K15ac      | I | H <sub>2</sub> N-YAGGKAGKDSGKacAKTKacAVSR-<br>C(O)NH <sub>2</sub>   | 2063.14 | 2062.65 |
| H2A.Z<br>K13ac,K15ac      | I | H <sub>2</sub> N-YAGGKAGKDSGKAKacTKacAVSR-<br>C(O)NH <sub>2</sub>   | 2063.14 | 2062.62 |
| H2A.Z<br>K7ac,K13ac,K15ac | I | H <sub>2</sub> N-YAGGKAGKacDSGKAKacTKacAVSR-<br>C(O)NH <sub>2</sub> | 2105.15 | 2105.47 |

### Representative LC/MS Spectra of 5FW-BPTF

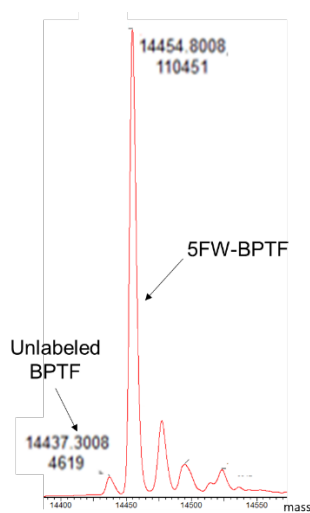

**Figure S3.** Representative LC/MS spectra of purified 5FW-BPTF showing peaks for unlabeled and 5FW BPTF. The intensities of these peaks were used to determine percent fluorine incorporation. All fluorinated proteins expressed and used in these experiments were characterized in this manner.

**Table S2: LC/MS Characterization of Proteins.**

| Protein        | Calculated m/z (Da) | Observed m/z (Da) | % Fluorine Incorporation |
|----------------|---------------------|-------------------|--------------------------|
| Unlabeled BPTF | 14437               | 14437             | N.A.                     |
| 5FW-BPTF       | 14455               | 14453             | 95                       |
| 5FW-CECR2      | 13852               | 13853             | 93                       |
| 5FW-PCAF       | 17182               | 17182             | 86                       |
| 5FW-BRD2(1)    | 14951               | 14951             | 96                       |
| 5FW-BRD2(2)    | 13369               | 13369             | 99                       |
| 5FW-BRD4(1)    | 15137               | 15135             | 95-98                    |
| 5FW-BRD4(2)    | 15054               | 15054             | 95                       |
| 5FW-BRDT(1)    | 14184               | 14183             | 93                       |

**Assignment of BRD2(1) Resonances**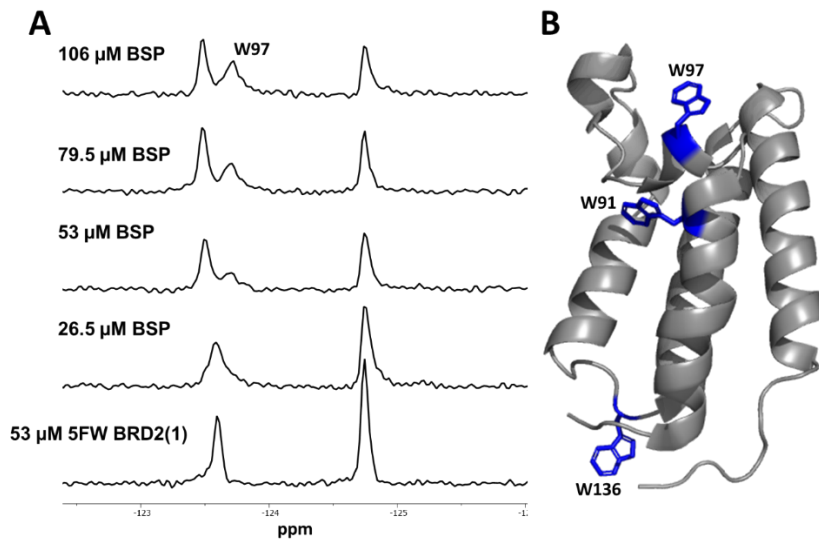

**Figure S4.** A) PrOF NMR titration of 5FW-BRD2(1) with Bromosporine (BSP) to assign WPF shelf 5FW resonance. The <sup>19</sup>F NMR spectrum of 5FW-BRD2(D2) shows only two resonances although there are three tryptophan residues in this protein. Upon the addition of BSP, the resonance at -124.75 ppm decreases in intensity and a resonance at -123.70 appears. This allows us to tentatively assign this resonance to W97, which lies in the WPF shelf. B) X-ray crystal structure of BRD2(1) (PDB: 2DVS) showing its three tryptophan residues.



### SPR with GST-BPTF and H2A.Z II K7ac,K13ac.

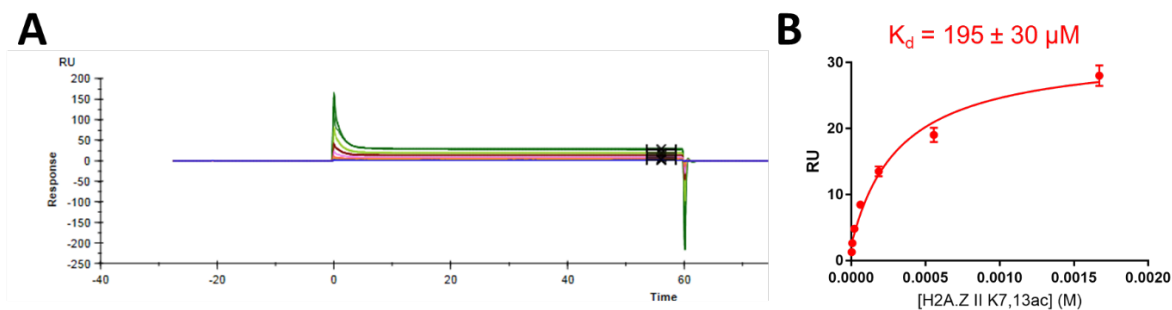

**Figure S5.** A) Sensorgram of SPR titration with H2A.Z II K7ac,K13ac. B) Binding isotherm of H2A.Z II K7ac,K13ac fitted with GraphPad Prism 5 software.

### AlphaScreen competition with His<sub>9</sub> BPTF.

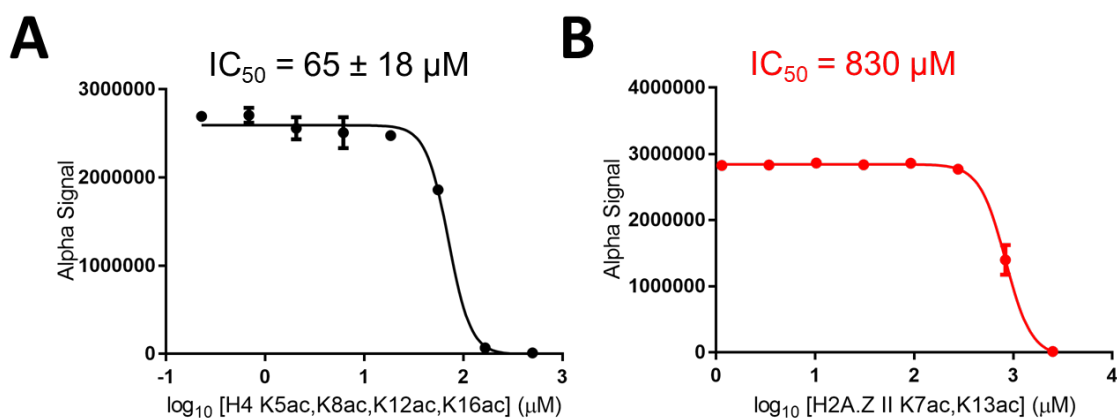

**Figure S6.** Alpha Screen titration with His<sub>9</sub> BPTF and A) positive control H4 K5ac,K8ac,K12ac,K16ac peptide giving an IC<sub>50</sub> of  $65 \pm 18 \mu\text{M}$  across three technical replicates. The  $K_d$  determined by PrOF NMR,  $70 \mu\text{M}$  is in close agreement, validating the robustness of this competition-based assay. B) AlphaScreen titration of H2A.Z II K7ac,K13ac yielded average IC<sub>50</sub> of  $830 \mu\text{M}$  from two technical replicates.

## X-ray Crystallography

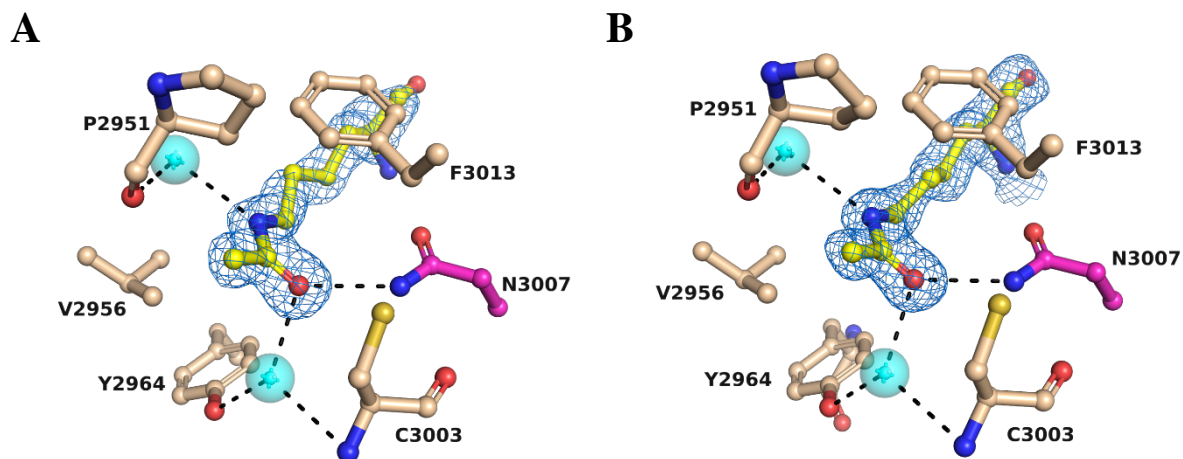

**Figure S7.** Co-crystal structures of BPTF BRD with acetylated peptides. A) View of the acetylated lysine of peptide H2A.Z I (K4ac,K11ac) in the Kac site. The blue mesh is the 2Fo-Fc density contoured at  $1\sigma$  and determined at 1.51 Å resolution. Water molecules are shown as cyan spheres, H-bonding interactions as black dotted lines. B) Same as A) for peptide H2A.Z II (K7ac,K13ac) determined at 1.22 Å resolution.

**Table S3: Crystallography Statistics.**

| Inhibitor                                                                                                                                                                                                                                                                 |              | Hac_RS2016 (H2A.Z I<br>K4ac,K11ac) | NO2021 (H2A.Z II<br>K7ac,K13ac) |
|---------------------------------------------------------------------------------------------------------------------------------------------------------------------------------------------------------------------------------------------------------------------------|--------------|------------------------------------|---------------------------------|
| <b>Data collection</b>                                                                                                                                                                                                                                                    |              |                                    |                                 |
| <b>Space group</b>                                                                                                                                                                                                                                                        |              | C 1 2 1                            | C 1 2 1                         |
| <b>Unit cell<br/>dimensions</b>                                                                                                                                                                                                                                           | a            | 111.71                             | 111.32                          |
|                                                                                                                                                                                                                                                                           | b            | 27.15                              | 27.16                           |
|                                                                                                                                                                                                                                                                           | c            | 38.01                              | 38.03                           |
|                                                                                                                                                                                                                                                                           | $\alpha$     | 90                                 | 90                              |
|                                                                                                                                                                                                                                                                           | $\beta$      | 97                                 | 96                              |
|                                                                                                                                                                                                                                                                           | $\gamma$     | 90                                 | 90                              |
| <b>Resolution range (Å)</b>                                                                                                                                                                                                                                               |              | 37.73 - 1.51<br>(1.564 - 1.51)     | 37.79 - 1.22<br>(1.264 - 1.22)  |
| <b>Unique reflections</b>                                                                                                                                                                                                                                                 |              | 18040 (1745)                       | 31161 (2748)                    |
| <b>Rmeas (%)</b>                                                                                                                                                                                                                                                          |              | 5.4 (31.7)                         | 5.9 (68.4)                      |
| <b>Completeness (%)</b>                                                                                                                                                                                                                                                   |              | 99.64 (99.94)                      | 91.51 (81.71)                   |
| <b>I/<math>\sigma</math></b>                                                                                                                                                                                                                                              |              | 24.71 (8.0)                        | 14.06 (3.1)                     |
| <b>Structure refinement</b>                                                                                                                                                                                                                                               |              |                                    |                                 |
| <b>Rwork (%)</b>                                                                                                                                                                                                                                                          |              | 16.65 (15.98)                      | 19.19 (34.14)                   |
| <b>Rfree<sup>a</sup> (%)</b>                                                                                                                                                                                                                                              |              | 19.50 (17.96)                      | 22.31 (32.54)                   |
| <b>Wilson B (Å<sup>2</sup>)</b>                                                                                                                                                                                                                                           |              | 13.3                               | 12.2                            |
| <b>Average B (Å<sup>2</sup>)</b>                                                                                                                                                                                                                                          | all          | 19.40                              | 18.1                            |
|                                                                                                                                                                                                                                                                           | protein      | 18.77                              | 17.4                            |
|                                                                                                                                                                                                                                                                           | ligand       | 34.80                              | 41.0                            |
|                                                                                                                                                                                                                                                                           | solvent      | 25.46                              | 24.6                            |
| <b>rmsd<sup>b</sup> bond lengths (Å)</b>                                                                                                                                                                                                                                  |              | 0.005                              | 0.005                           |
| <b>rmsd angles (deg)</b>                                                                                                                                                                                                                                                  |              | 0.80                               | 0.79                            |
| <b>Ramachandran</b>                                                                                                                                                                                                                                                       | favored (%)  | 100.00                             | 100.00                          |
|                                                                                                                                                                                                                                                                           | allowed (%)  | 0.00                               | 0.00                            |
|                                                                                                                                                                                                                                                                           | outliers (%) | 0                                  | 0                               |
| <p>Values in parenthesis are for the highest resolution bins.</p> <p><sup>a</sup> Rfree is Rcryst calculated for randomly chosen unique reflections</p> <p><sup>b</sup> rmsd = root-mean-square deviation from ideal values, which were excluded from the refinement.</p> |              |                                    |                                 |

**$^1\text{H}$  CPMG with BPTF and H2A.Z I K7ac, K13ac increasing protein concentration.**

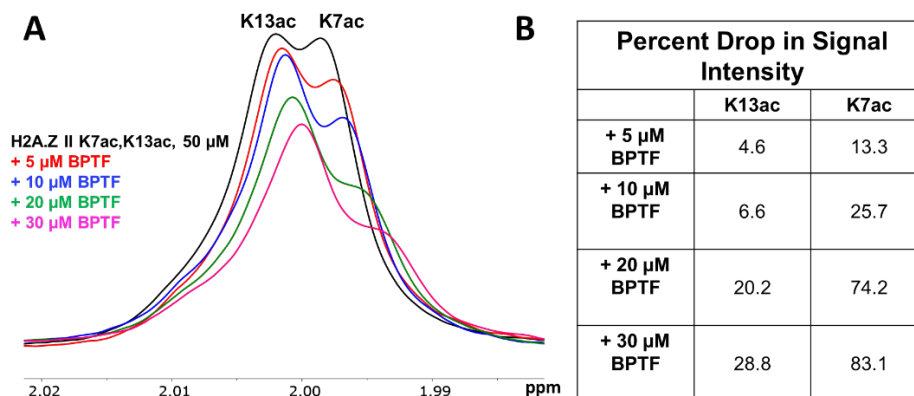

**Figure S8.** Ligand-observed  $^1\text{H}$  NMR CPMG competition experiment evaluating H2A.Z II K7, K13ac for BPTF binding site engagement. A) The experimental spectrum for H2A.Z II K7, K13ac peptide alone (black), with the addition of 5  $\mu\text{M}$  BPTF (red), 10  $\mu\text{M}$  BPTF (blue), 20  $\mu\text{M}$  BPTF (green), and 30  $\mu\text{M}$  BPTF (magenta). The upfield resonance that has been assigned to K7ac decreases significantly more than the downfield resonance (K13ac) in a protein dependent manner. B) Percent drop in acetyl methyl resonance intensity for K13ac and K7ac upon the addition of BPTF.

## $^1\text{H}$ CPMG competition with BPTF and H2A.Z I K7ac-d<sub>3</sub>, K13ac

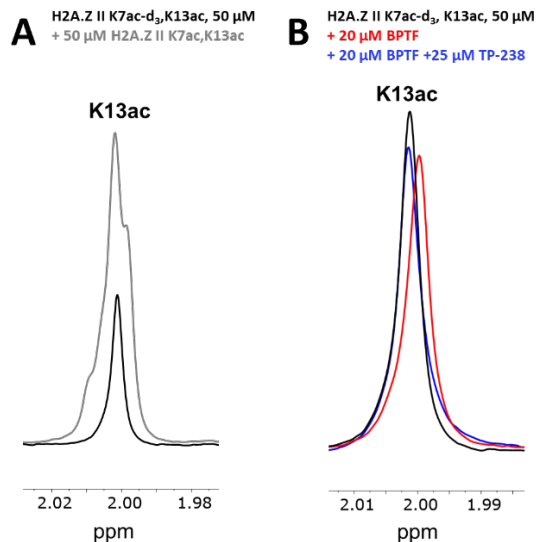

**Figure S9.** A) Overlaid spectra of H2A.Z II K7ac-d<sub>3</sub>,K13ac peptide alone (black) and with the addition of H2A.Z II K7,K13 peptide (grey). (B) Experimental spectra for H2A.Z II K7ac-d<sub>3</sub>,K13ac peptide alone (red), with the addition of BPTF (red), and with addition of competitor TP-238 (blue) are overlaid. A significant drop in resonance intensity is not observed, with no restoration upon competitor addition. This confirms the preferential engagement of K7ac on H2A.Z II by BPTF.

## $^1\text{H}$ CPMG with CECR2 and H2A.Z II K7ac, K13ac.

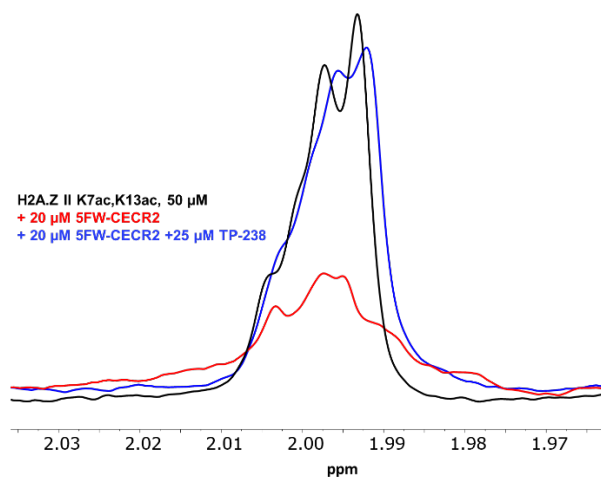

**Figure S10.** Ligand-observed  $^1\text{H}$  NMR CPMG competition experiment evaluating H2A.Z II K7ac,K13ac for CECR2 binding site engagement. Experimental spectra for peptide alone (red), with the addition of 5FW-CECR2 (red), and with addition of competitor TP-238 (blue) are overlaid.

## Synthesis of TP-238

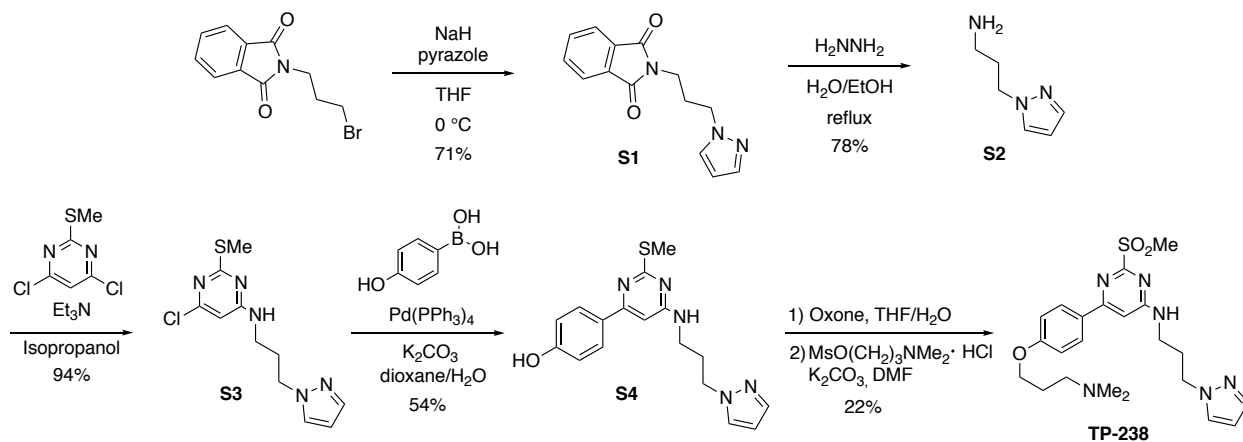

**Scheme 1:** Synthesis of TP-238

## Experimental Procedures:

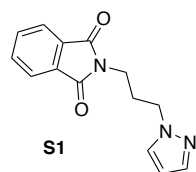

**2-(3-bromopropyl)isoindoline-1,3-dione:** To a suspension of NaH (60%) (881 mg, 22.0 mmol) in THF (50 mL) at 0 °C was added pyrazole (1.50 g, 22.0 mmol) dropwise at 0 °C. The resultant solution stirred at 0 °C for 1.5 h before *N*-(3-Bromopropyl)phthalimide (5.37 g, 20.0 mmol) was added and the mixture was slowly warmed to room temperature and stirred overnight. It was then concentrated and purified by Combiflash Rf system (hexanes/ EtOAc, 0-100% EtOAc) to yield 3.64 g (71%) of **S1** as a white solid. <sup>1</sup>H NMR (500 MHz, CDCl<sub>3</sub>) δ 7.84 (dd, *J* = 5.4, 3.1 Hz, 2H), 7.75 – 7.68 (m, 2H), 7.52 – 7.45 (m, 2H), 6.21 (t, *J* = 2.1 Hz, 1H), 4.19 (t, *J* = 6.8 Hz, 2H), 3.72 (t, *J* = 6.7 Hz, 2H), 2.28 (p, *J* = 6.8 Hz, 2H). <sup>13</sup>C NMR (126 MHz, CDCl<sub>3</sub>) δ 168.5, 139.6, 134.2, 132.2, 129.6, 123.4, 123.1, 116.3, 105.5, 105.3, 49.7, 35.5, 29.5. HRMS (ESI): calc'd for C<sub>14</sub>H<sub>14</sub>N<sub>3</sub>O<sub>2</sub>[M+H]<sup>+</sup>: 278.0900; found 278.0882.

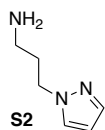

**3-(1H-pyrazol-1-yl)propan-1-amine:** To a solution of **S1** (2.88 g, 11.3 mmol) in EtOH (30 mL) and H<sub>2</sub>O (10 mL) was added hydrazine hydrate (1.21 mL, 24.8 mmol). The solution was stirred and heated to reflux for 18 h at which point concentrated HCl (7.72 mL) was added and the solution refluxed for an additional 6 h. It was then cooled to room temperature, filtered and concentrated partially *in vacuo* before washing with DCM (2 x 10 mL). The aqueous layer was then adjusted to pH *ca.* 12 with NaOH pellets before extraction with DCM (2x 10 mL). The extracts were dried (MgSO<sub>4</sub>), filtered and concentrated *in vacuo* to yield 1.41 g (78%) of amine **S2** as a yellow oil and was used without further purification. <sup>1</sup>H NMR (500 MHz, CDCl<sub>3</sub>) δ 7.44 (d, *J* = 2.0 Hz, 1H), 7.34 (d, *J* = 2.3 Hz, 1H), 6.18 (t, *J* = 2.1 Hz, 1H), 4.17 (t, *J* = 6.9 Hz, 2H), 2.63 (t, *J* = 6.8 Hz, 2H), 1.93 (p, *J* = 6.8 Hz, 2H), 1.68 (s, 2H). <sup>13</sup>C NMR (126 MHz, CDCl<sub>3</sub>) δ 139.1, 129.0, 105.3, 49.5, 39.0, 33.9. HRMS (ESI): calc'd for C<sub>6</sub>H<sub>12</sub>N<sub>3</sub>[M+H]<sup>+</sup>: 126.1026; found 126.1039.

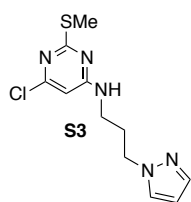

***N*-(3-(1*H*-pyrazol-1-yl)propyl)-6-chloro-2-(methylthio)pyrimidin-4-amine:** To a solution of the sulfide (162 mg, 0.833 mmol) in isopropanol (3 mL) was added amine **S2** (125 mg, 0.999 mmol) and Et<sub>3</sub>N (116  $\mu$ L, 0.833 mmol) at room temperature. The solution was then warmed to reflux and stirred for 18 h at which point it was concentrated *in vacuo* and purified by Combiflash Rf system (hexanes/ EtOAc, 0-100% EtOAc) to yield 222 mg (94%) of sulfide **S3** as a white solid. <sup>1</sup>H NMR (500 MHz, CDCl<sub>3</sub>)  $\delta$  7.53 (d, *J* = 1.9 Hz, 1H), 7.39 (d, *J* = 2.3 Hz, 1H), 6.28 (t, *J* = 2.1 Hz, 1H), 5.98 (s, 1H), 5.52 (t, *J* = 6.2 Hz, 1H), 4.30 – 4.19 (m, 2H), 3.36 (s, 2H), 2.47 (s, 3H), 2.13 (p, *J* = 6.4 Hz, 2H). <sup>13</sup>C NMR (126 MHz, CDCl<sub>3</sub>)  $\delta$  172.4, 162.7, 139.7, 129.5, 106.1, 49.4, 38.6, 29.8, 14.2.<sup>1</sup> HRMS (ESI): calc'd for C<sub>14</sub>H<sub>14</sub>N<sub>3</sub>O<sub>2</sub>[M+H]<sup>+</sup>: 284.0731; found 284.0746.

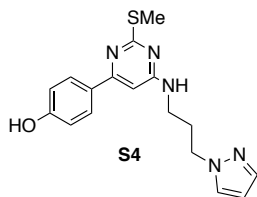

**4-(6-((3-(1*H*-pyrazol-1-yl)propyl)amino)-2-(methylsulfonyl)pyrimidin-4-yl)phenol:** A solution of (4-hydroxyphenyl)boronic acid (66 mg, 0.479 mmol), sulfide **S3** and K<sub>2</sub>CO<sub>3</sub> (110 mg, 0.798 mmol) in dioxanes (1.5 mL) and H<sub>2</sub>O (0.5 mL) was degassed prior to the addition of Pd(PPh<sub>3</sub>)<sub>4</sub> (46 mg, 0.40 mmol). The solution was warmed to reflux and stirred under N<sub>2</sub> for 18 h, at which point it was quenched with H<sub>2</sub>O (2 mL), extracted with EtOAc (3 x 3 mL), dried (MgSO<sub>4</sub>), filtered, and concentrated *in vacuo*. Purified by Combiflash Rf system (hexanes/ EtOAc, 0-100% EtOAc) to yield 80 mg (59%) of phenol **S4** as a white solid. <sup>1</sup>H NMR (500 MHz, DMSO)  $\delta$  9.86 (s, 1H), 7.84 (s, 1H), 7.74 (d, *J* = 2.2 Hz, 1H), 7.44 (d, *J* = 1.8 Hz, 2H), 6.88 – 6.81 (m, 2H), 6.51 (s, 1H), 6.23 (t, *J* = 2.0 Hz, 1H), 4.18 (t, *J* = 6.9 Hz, 2H), 2.45 (s, 3H), 2.03 (p, *J* = 6.9 Hz, 2H). <sup>13</sup>C NMR (126 MHz, DMSO)  $\delta$  169.9, 162.6, 159.5, 138.6, 129.9, 127.9, 127.6, 115.4, 104.9, 48.8, 37.5, 29.8, 13.3. HRMS (ESI): calc'd for C<sub>17</sub>H<sub>20</sub>N<sub>5</sub>OS [M+H]<sup>+</sup>: 342.1383; found 342.1427.

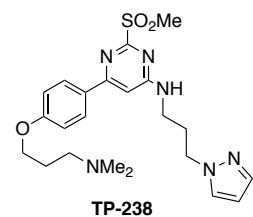

***N*-(3-(1*H*-pyrazol-1-yl)propyl)-6-(4-(3-(dimethylamino)propoxy)phenyl)-2-(methylsulfonyl)pyrimidin-4-amine:** To a solution of sulfide **S4** (31 mg, 0.091 mmol) in THF (1.5 mL) at room temperature was added Oxone (140 mg, 0.227 mmol) in H<sub>2</sub>O (0.5 mL) dropwise. The solution stirred for 18 h at room temperature before the addition of H<sub>2</sub>O (2.0 mL). The product was extracted from the aqueous layer with EtOAc (3 x 3 mL) and the organic extracts were combined, dried (MgSO<sub>4</sub>) filtered and concentrated *in vacuo*. The crude sulfone was then dissolved in DMF (2.0 mL) before the addition of K<sub>2</sub>CO<sub>3</sub> (38 mg) and 3-(dimethylamino)propyl methanesulfonate hydrochloride<sup>2</sup> (59 mg, 0.272 mmol). The solution was heated to 80°C for 18 h. The reaction was then quenched with H<sub>2</sub>O (2 mL) and extracted with EtOAc (3 x 3 mL). Organic extracts were dried (MgSO<sub>4</sub>), filtered and concentrated *in vacuo*. Purified via CombiFlash Rf system (hexanes/ EtOAc, 0-100% EtOAc, then DCM/MeOH, 0-30% MeOH). Isolated 9 mg, (22%) TP-238 as a colorless oil. <sup>1</sup>H NMR (500 MHz, CDCl<sub>3</sub>)  $\delta$  7.55 (s, 1H), 7.42 (s, 1H), 7.04 – 6.88 (m, 2H), 6.68 (d, *J* = 2.7 Hz, 1H), 6.27 (t, *J* = 2.2 Hz, 1H), 6.00 (s, 1H), 4.27 (d, *J* = 6.9 Hz, 2H), 4.07 (dt, *J* = 6.6, 4.2 Hz, 2H), 3.54 – 3.39 (m, 2H), 3.34 (d, *J* = 2.5 Hz, 3H), 2.48 (td, *J* = 7.7, 2.4 Hz, 2H), 2.27 (d, *J* = 2.6 Hz, 6H), 2.17 (t, *J* = 6.8 Hz, 2H), 2.04 – 1.91 (m, 2H). <sup>13</sup>C NMR (126 MHz, CDCl<sub>3</sub>)  $\delta$  165.8, 163.9, 161.7, 139.7, 129.7, 128.7, 128.2, 114.8, 106.0, 66.5, 56.4, 45.6, 38.9, 29.7, 27.6. HRMS (ESI): calc'd for C<sub>22</sub>H<sub>30</sub>N<sub>6</sub>NaO<sub>3</sub>S [M+Na]<sup>+</sup>: 481.1992; found 481.2622.

Notes:

1. We did not observe two shifts from the aromatic region that correspond to two carbons on the substituted pyrimidine ring for **S3**, **S4** or **TP-238**. However, the supporting <sup>1</sup>H NMR and HRMS data unequivocally confirm the indicated structures.
2. 3-(dimethylamino)propyl methanesulfonate hydrochloride was prepared according to literature procedure from *J. Am. Chem. Soc.* **1999**, *121*, 1452-1459.



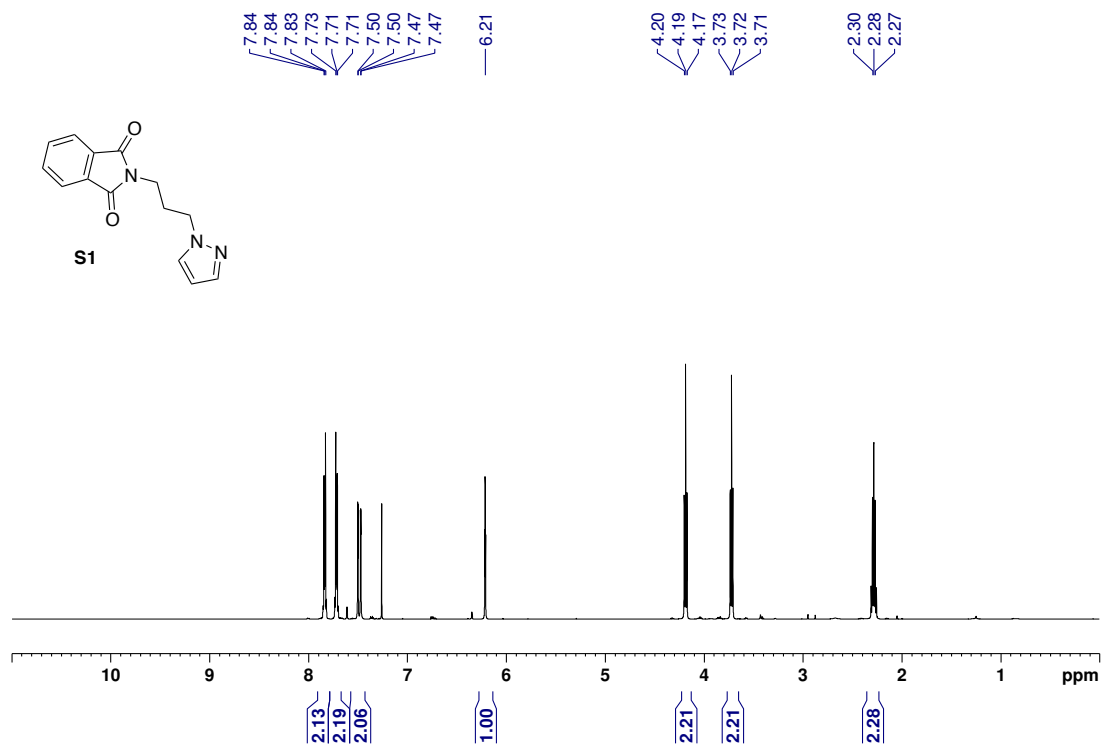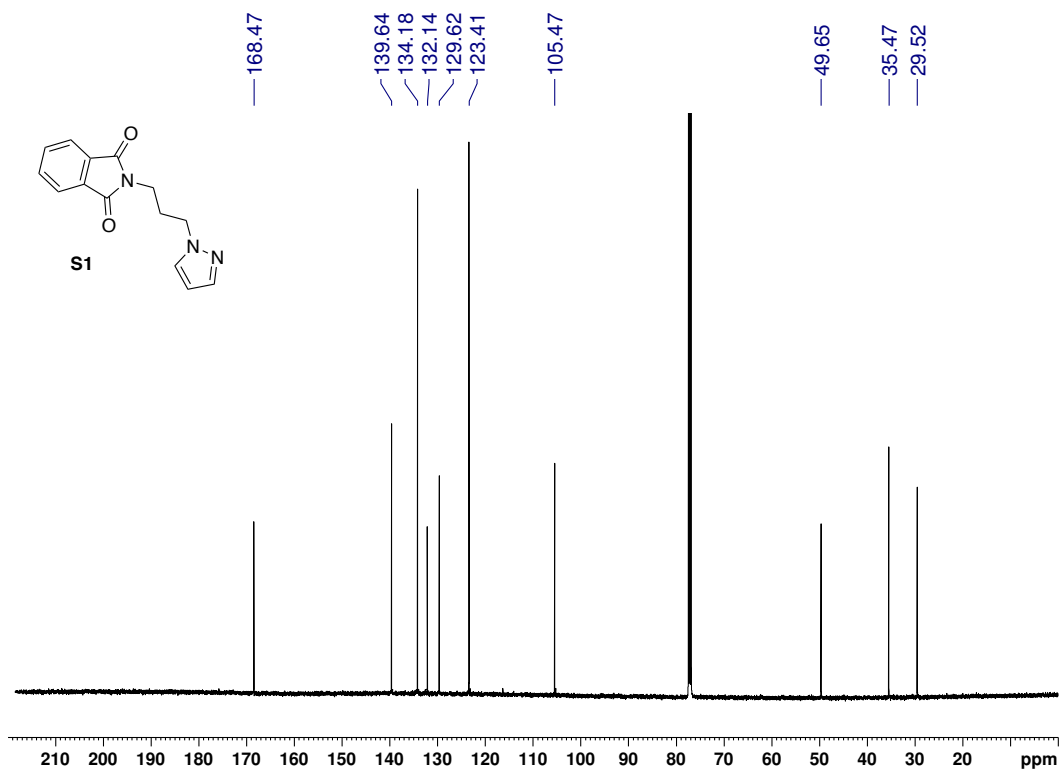

$^1\text{H}$  NMR (500 MHz,  $\text{CDCl}_3$ ) and  $^{13}\text{C}$  NMR (126 MHz) of **S1**

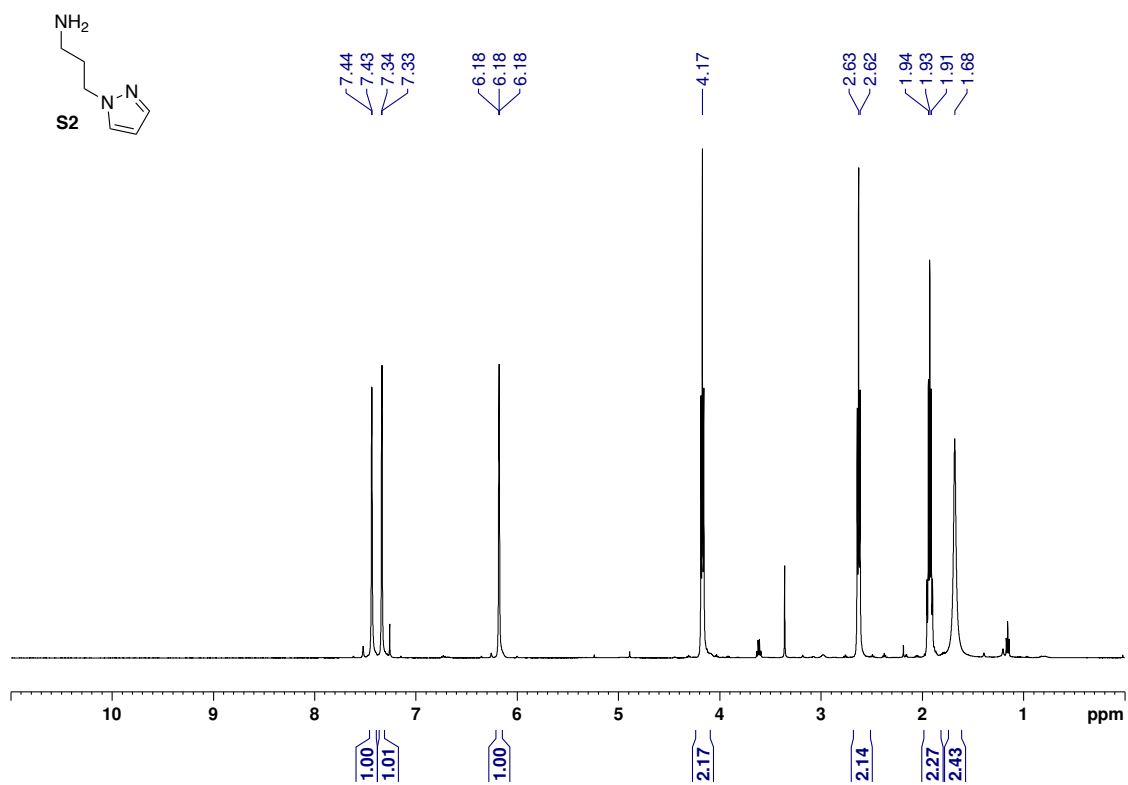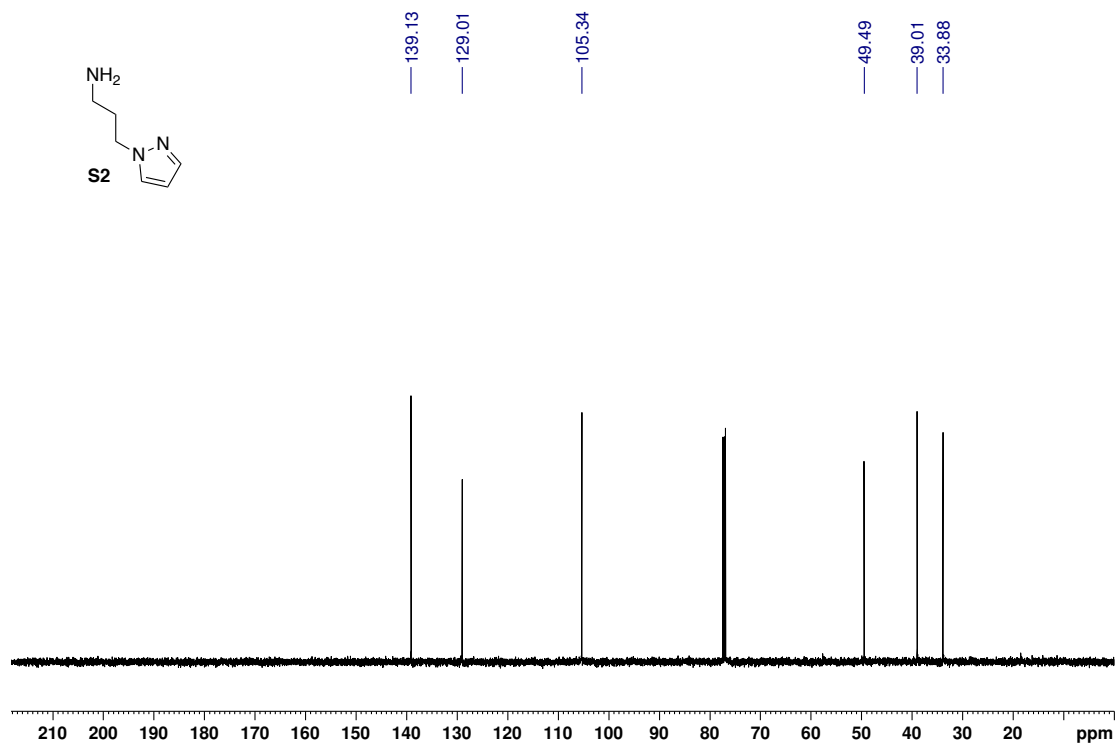

$^1\text{H}$  NMR (500 MHz,  $\text{CDCl}_3$ ) and  $^{13}\text{C}$  NMR (126 MHz) of **S2**

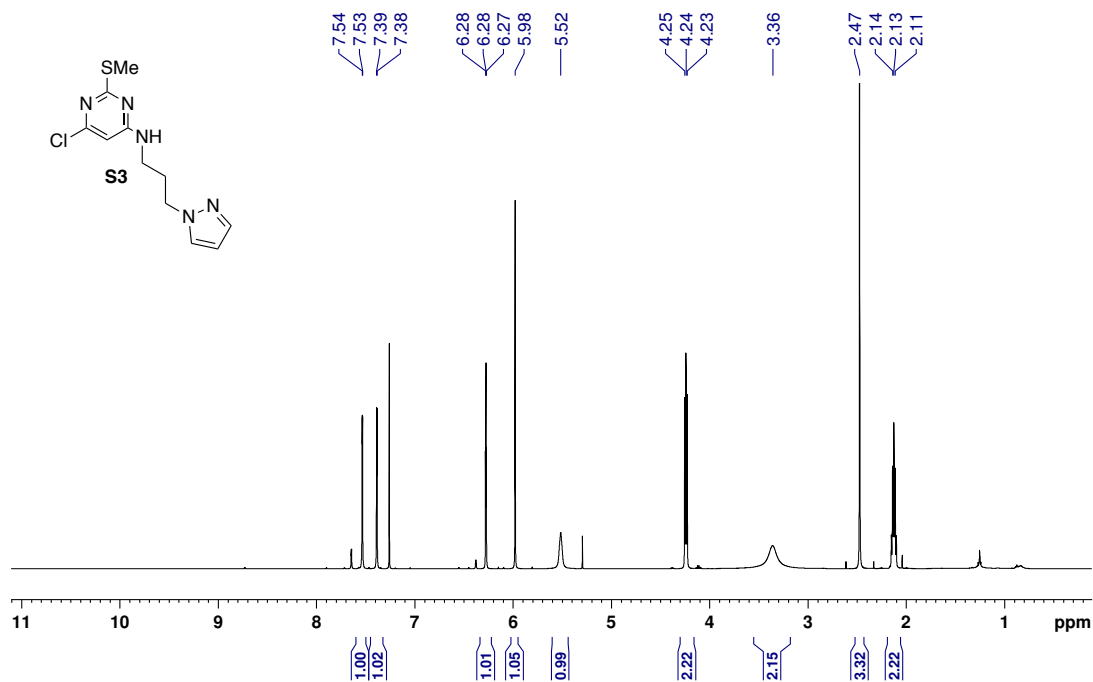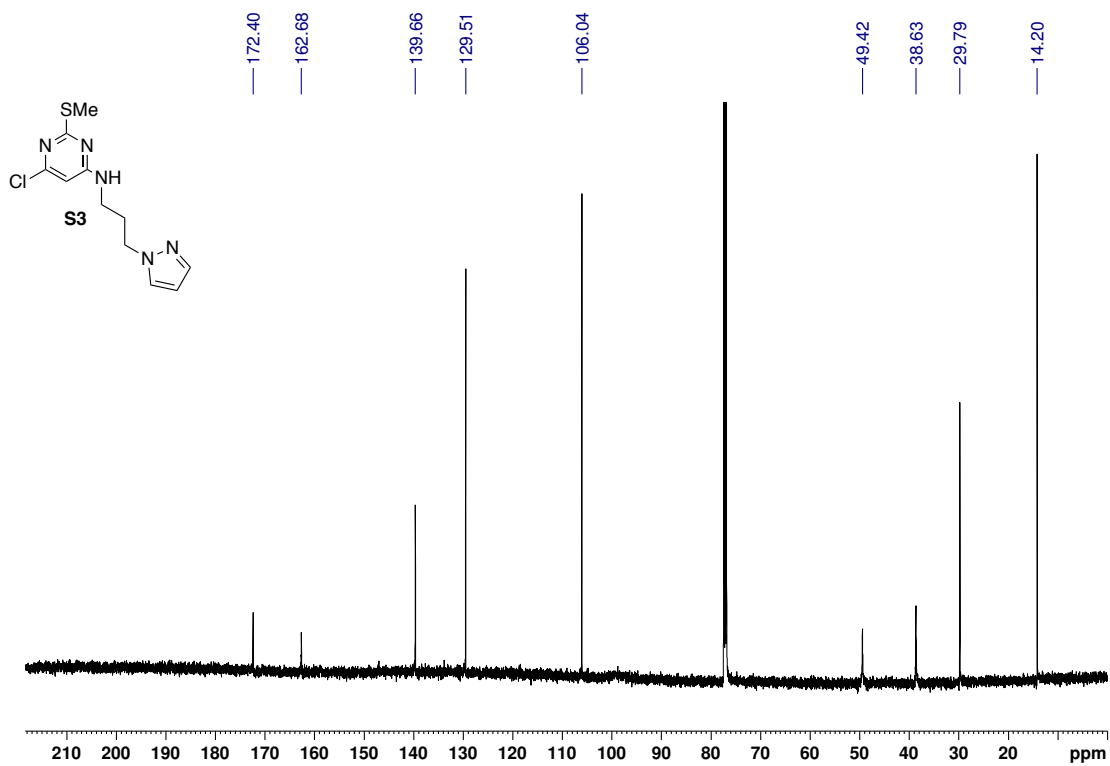

$^1\text{H NMR}$  (500 MHz,  $\text{CDCl}_3$ ) and  $^{13}\text{C NMR}$  (126 MHz) of S3

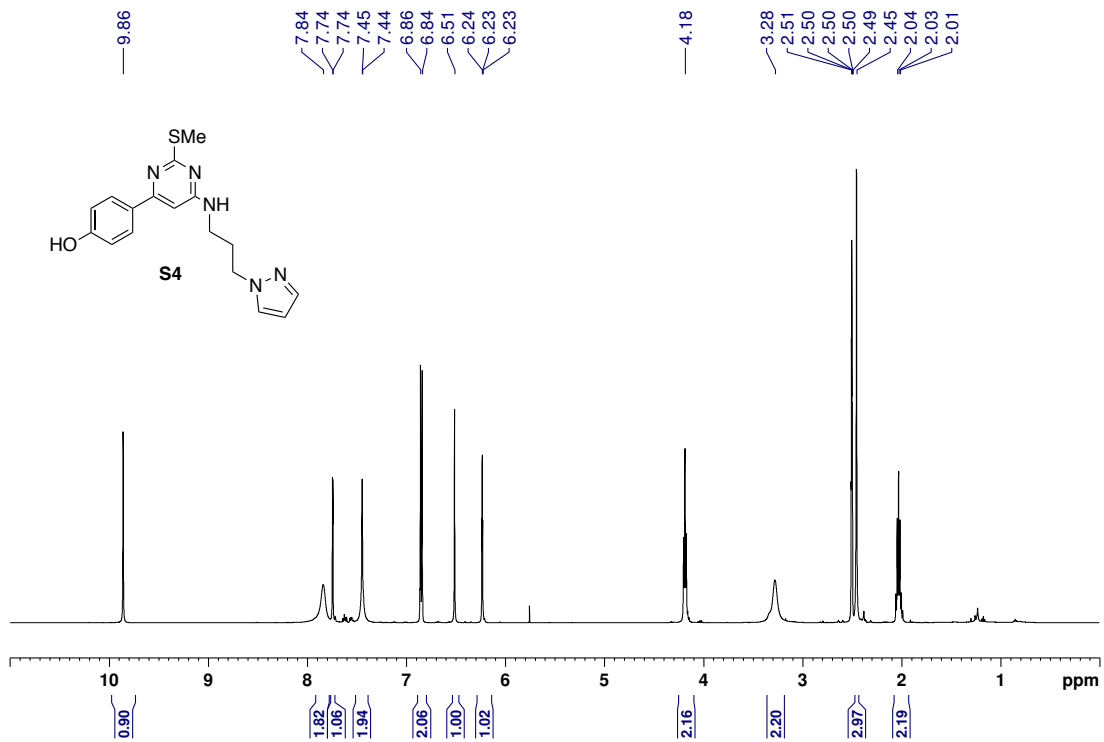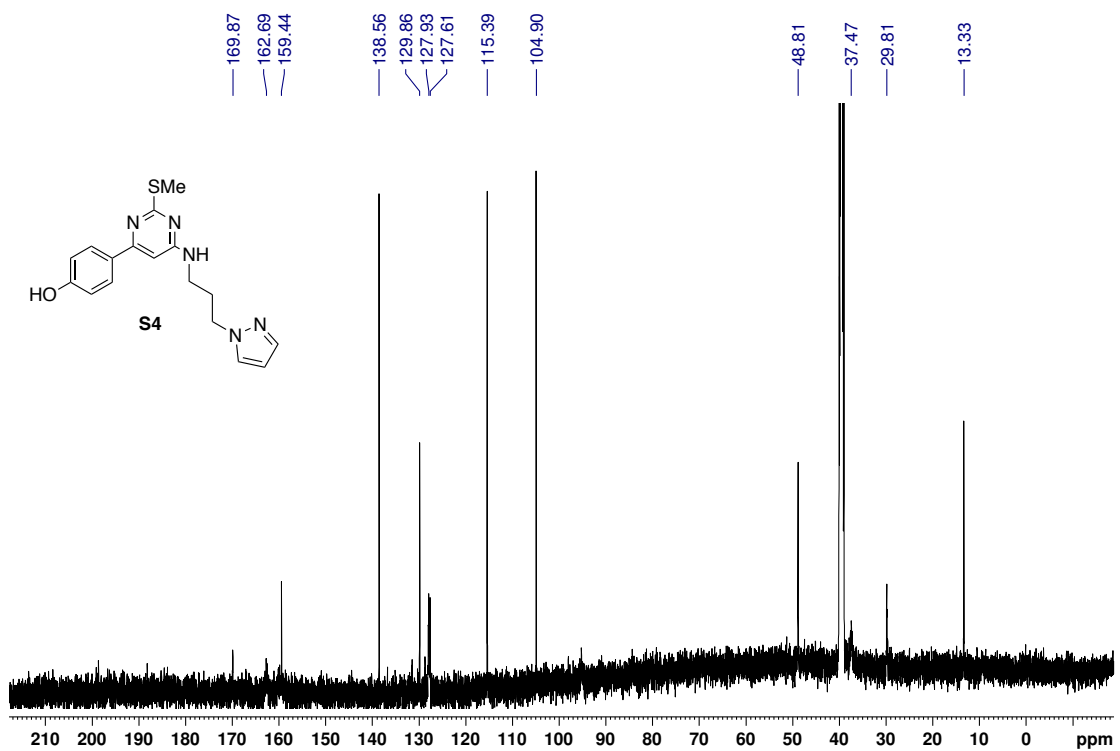

<sup>1</sup>H NMR (500 MHz, d<sub>6</sub>-DMSO) and <sup>13</sup>C NMR (126 MHz, d<sub>6</sub>-DMSO) of S4

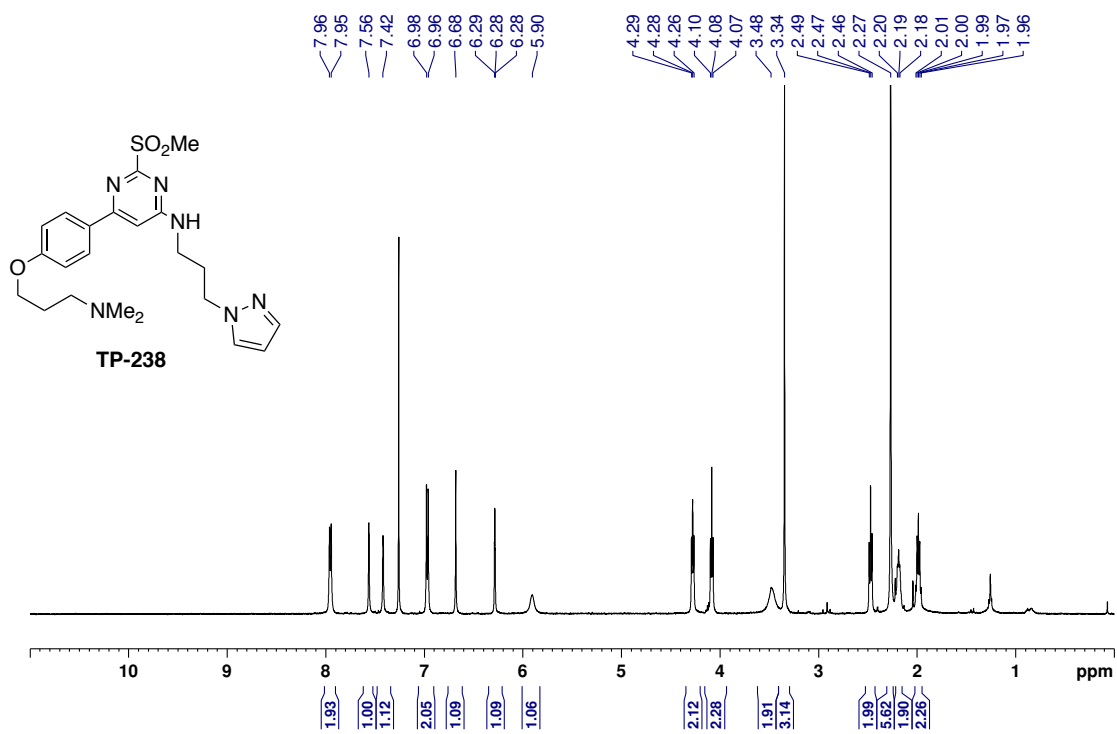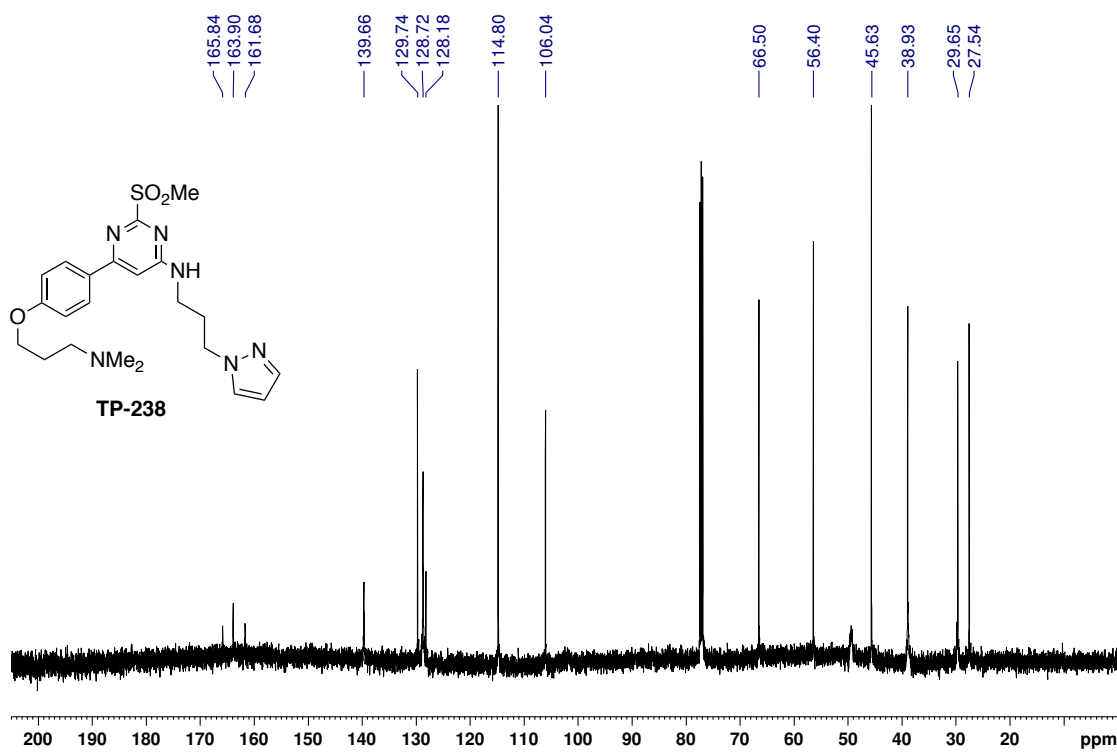

<sup>1</sup>H NMR (500 MHz, CDCl<sub>3</sub>) and <sup>13</sup>C NMR (126 MHz, CDCl<sub>3</sub>) of **TP-238**

**HPLC analytical purity traces for synthesized peptides.** Peptide purity was assessed with a Dionex Ultimate RP-HPLC system using a Vydac C-18 column and a 0-50% CH<sub>3</sub>CH gradient over 50 minutes. Traces are shown below.

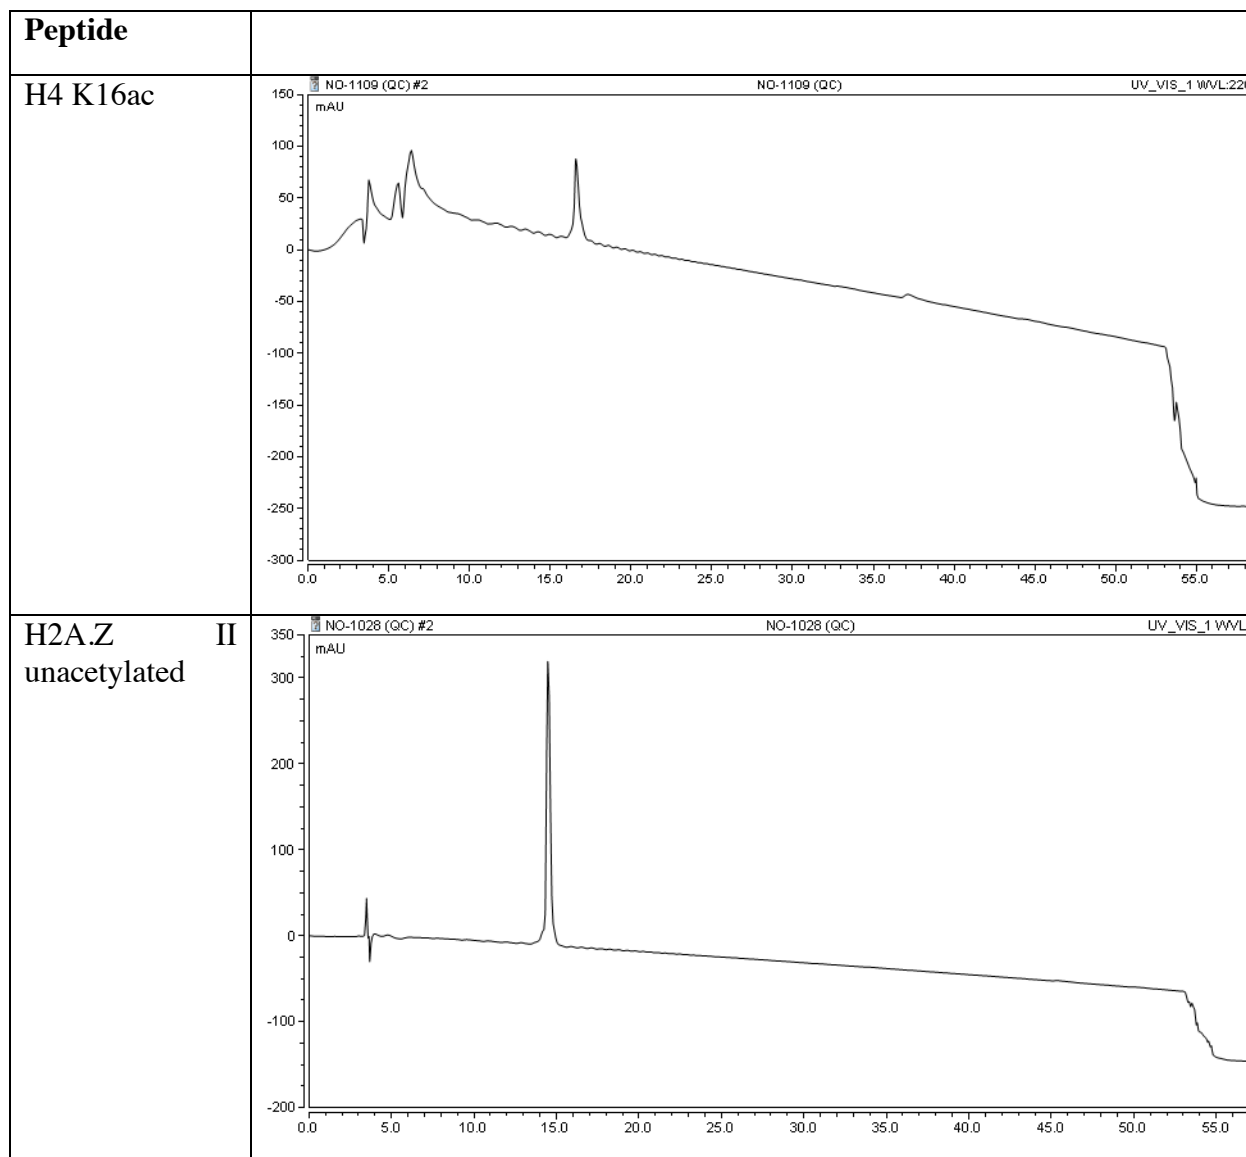

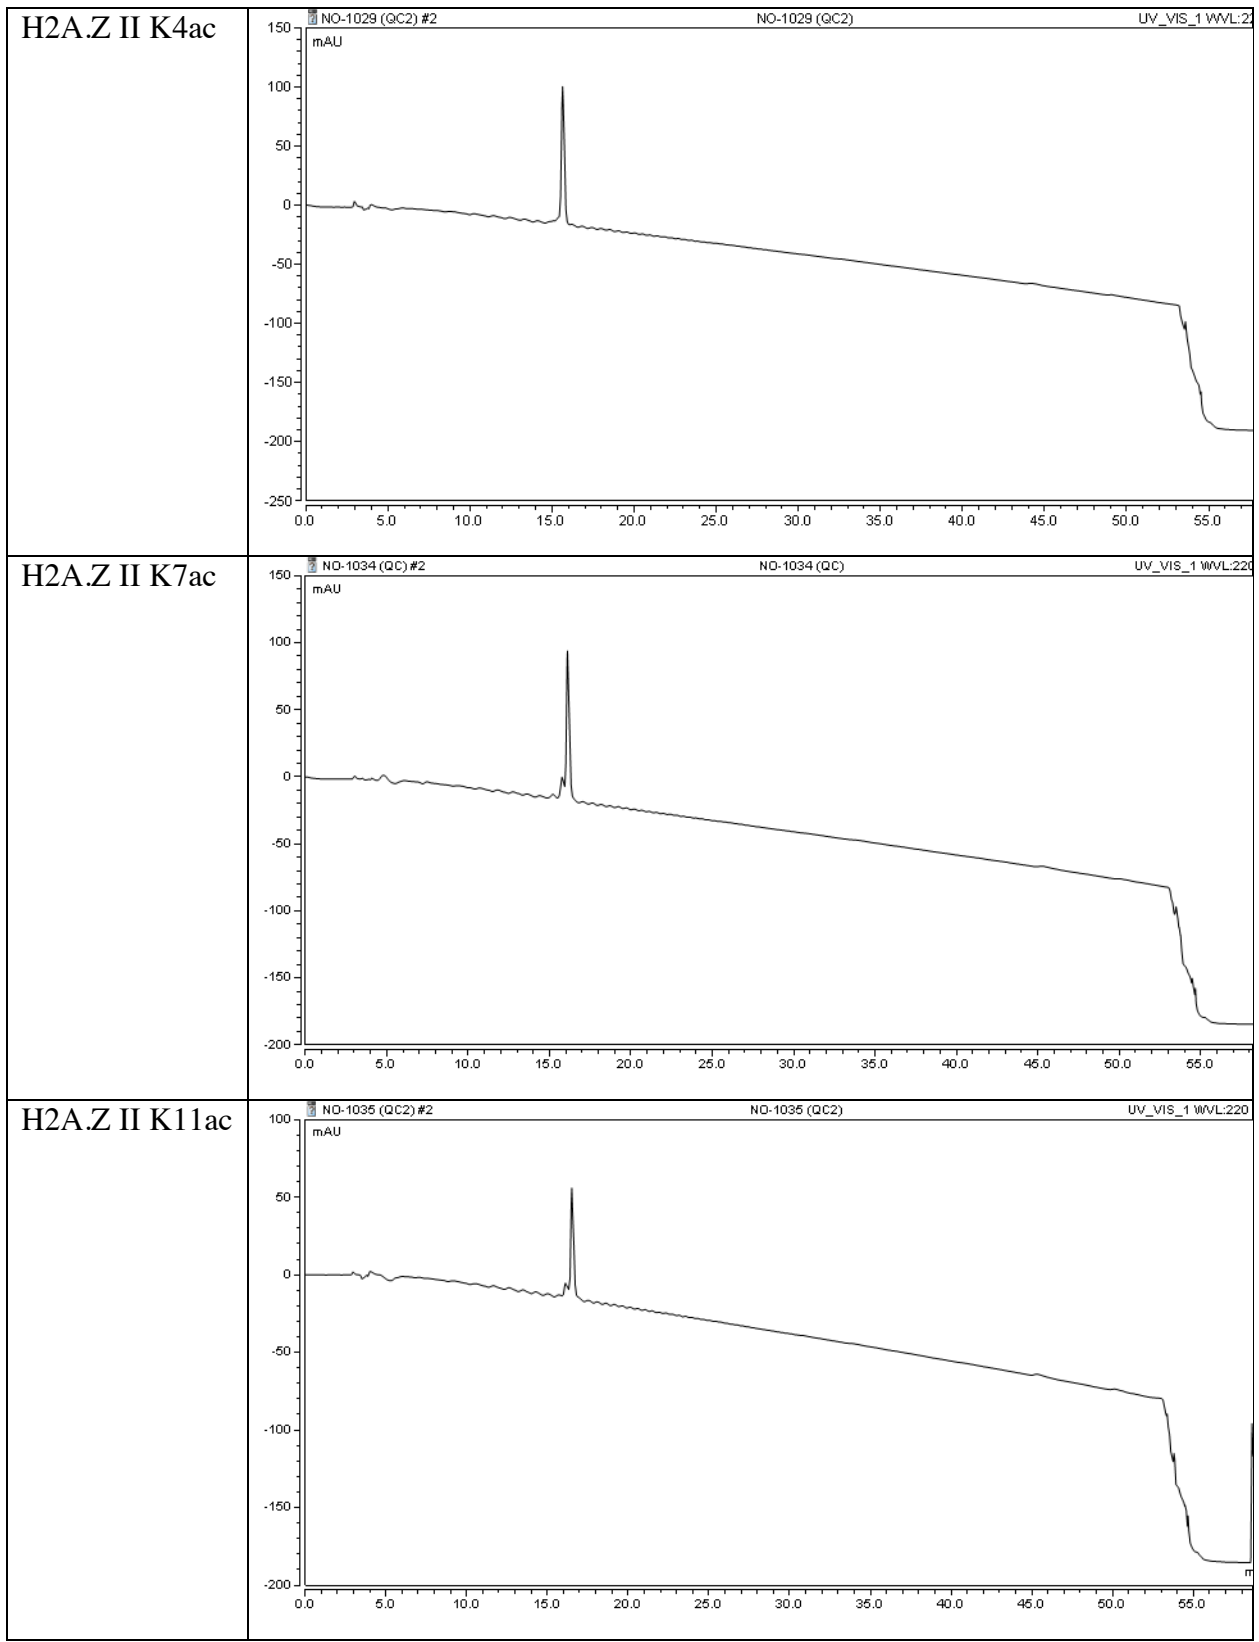

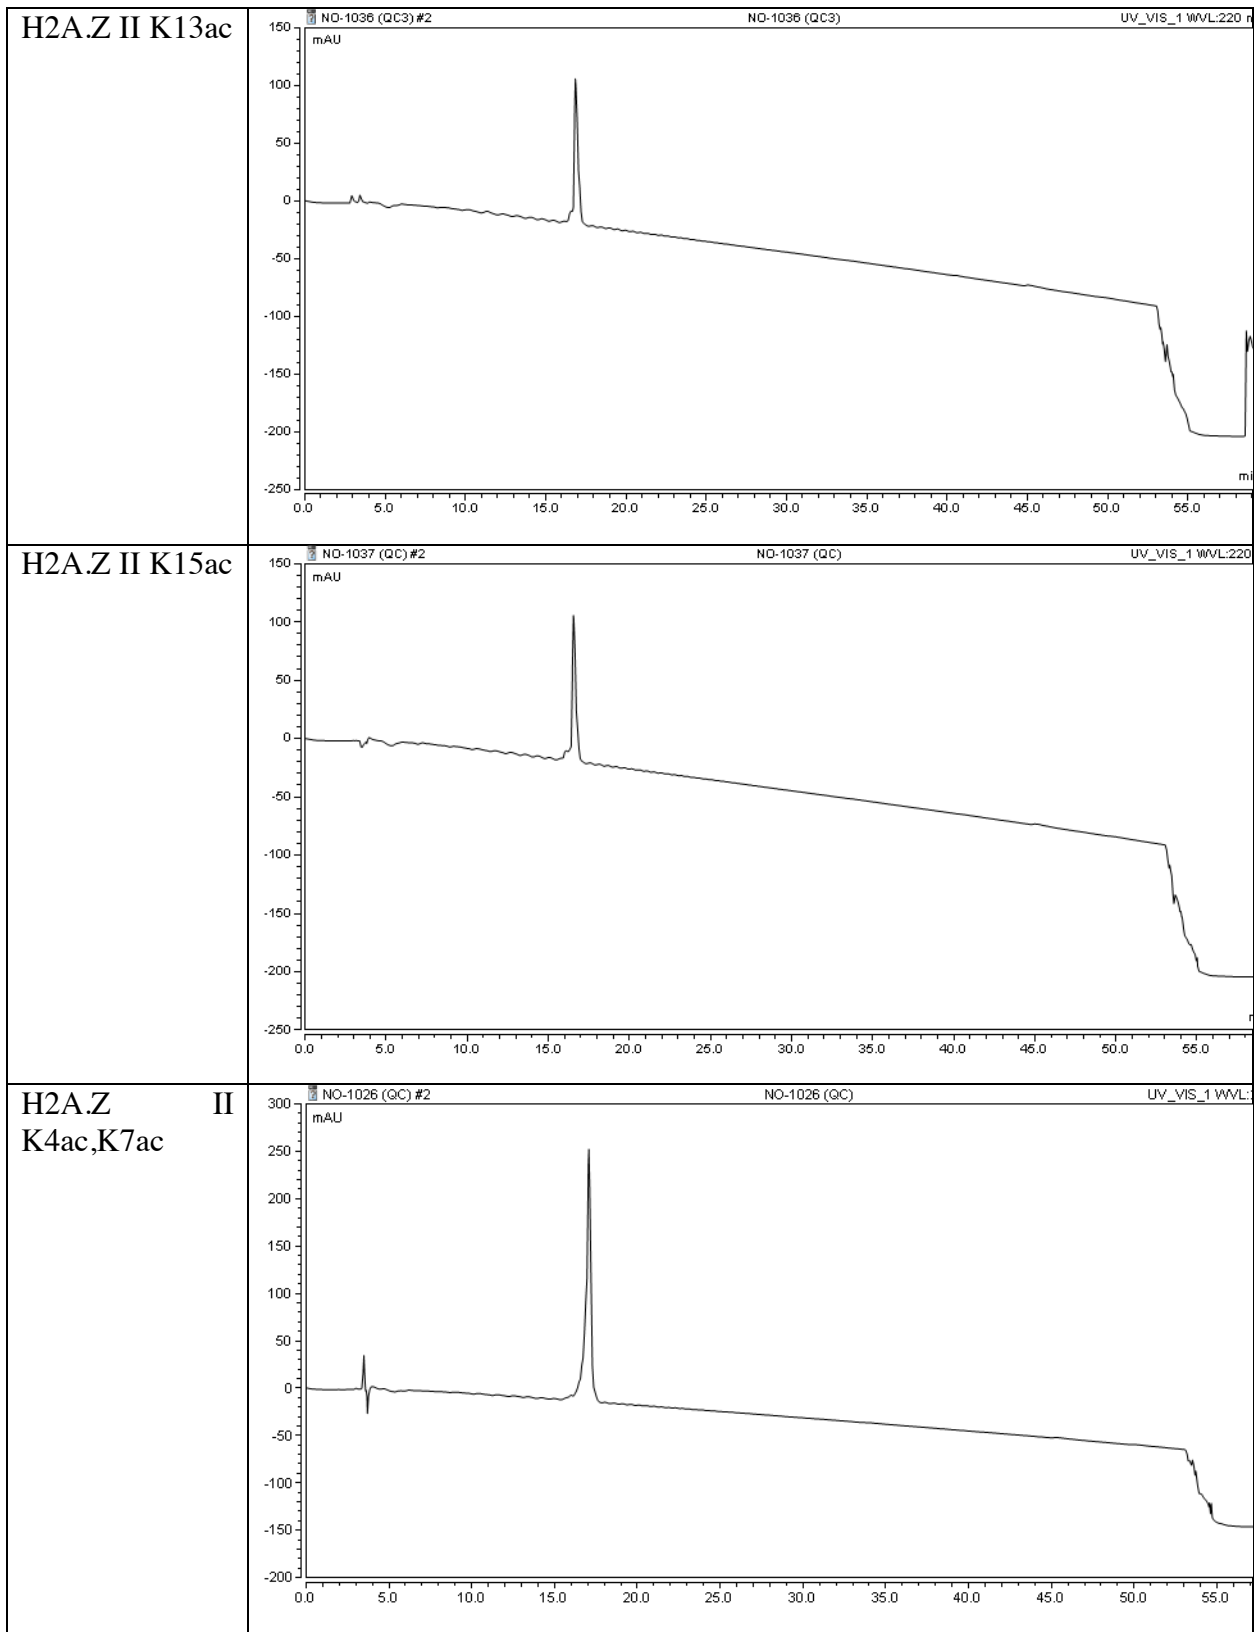



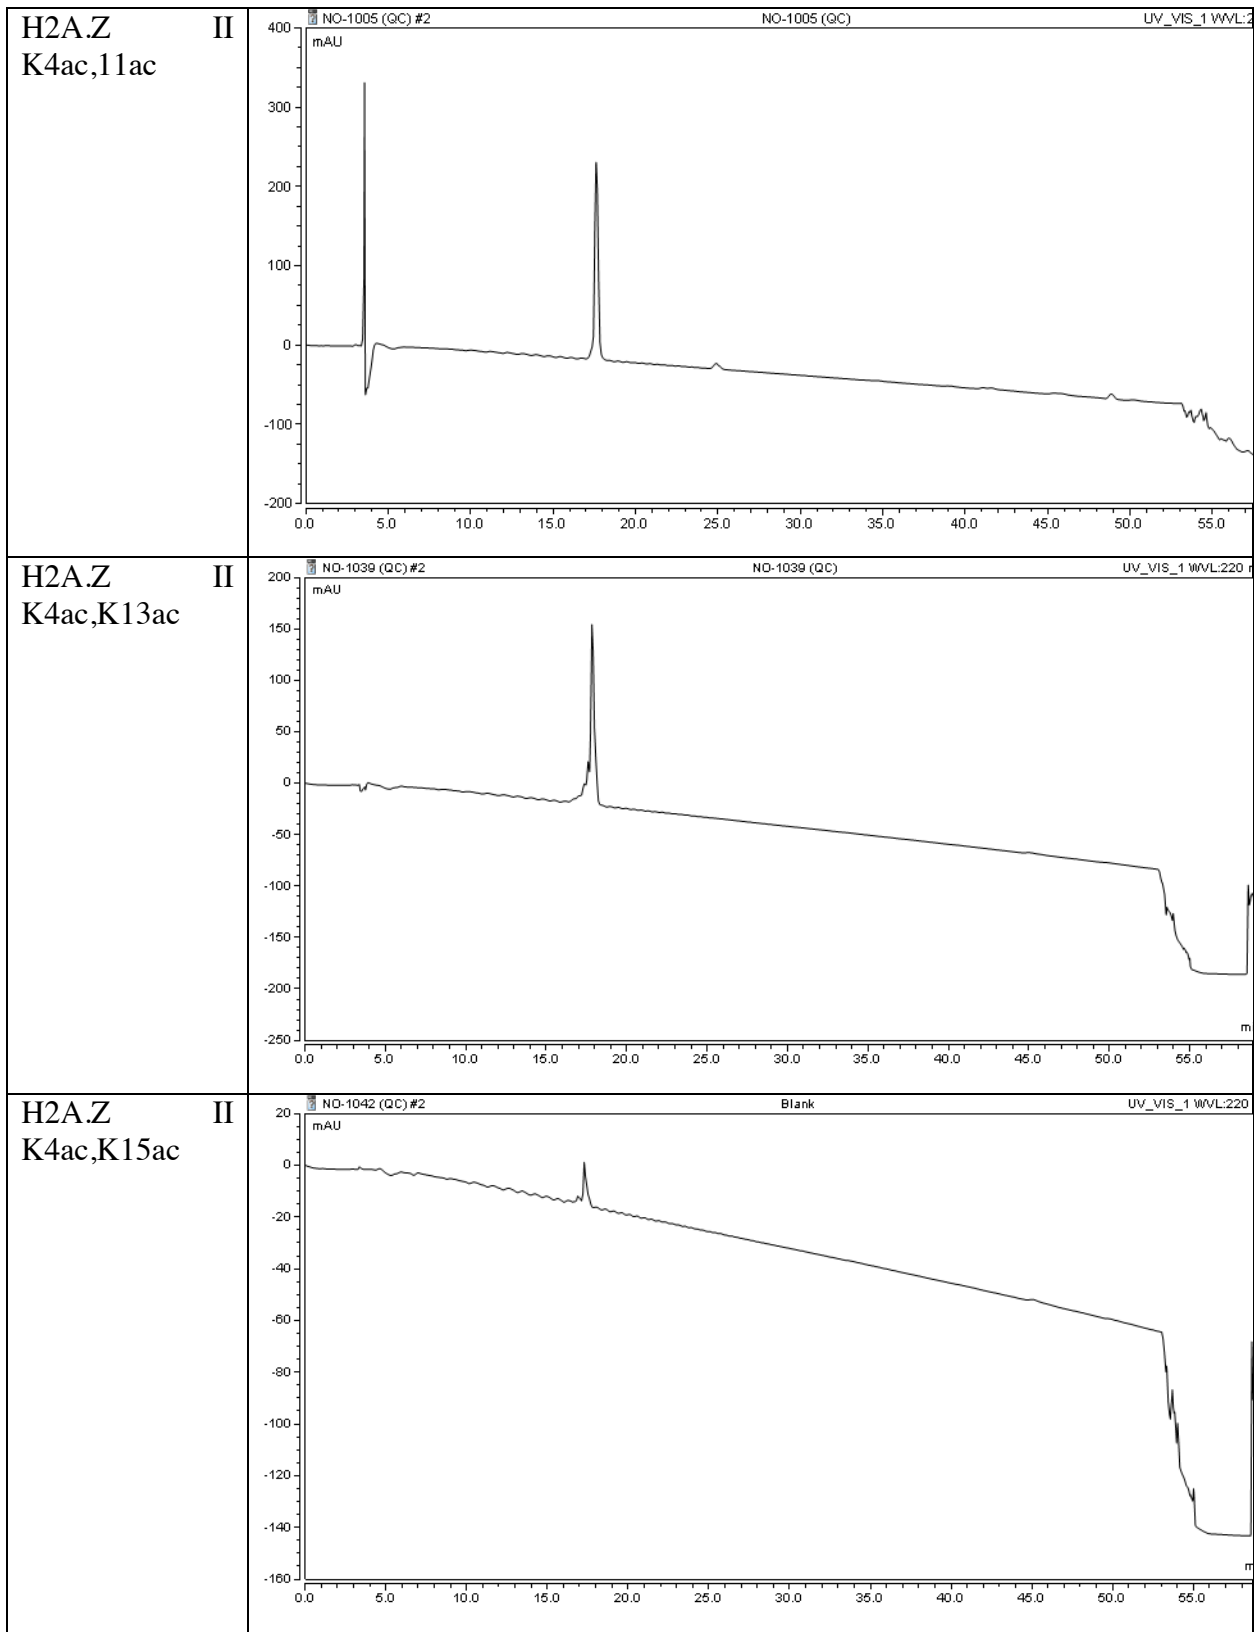

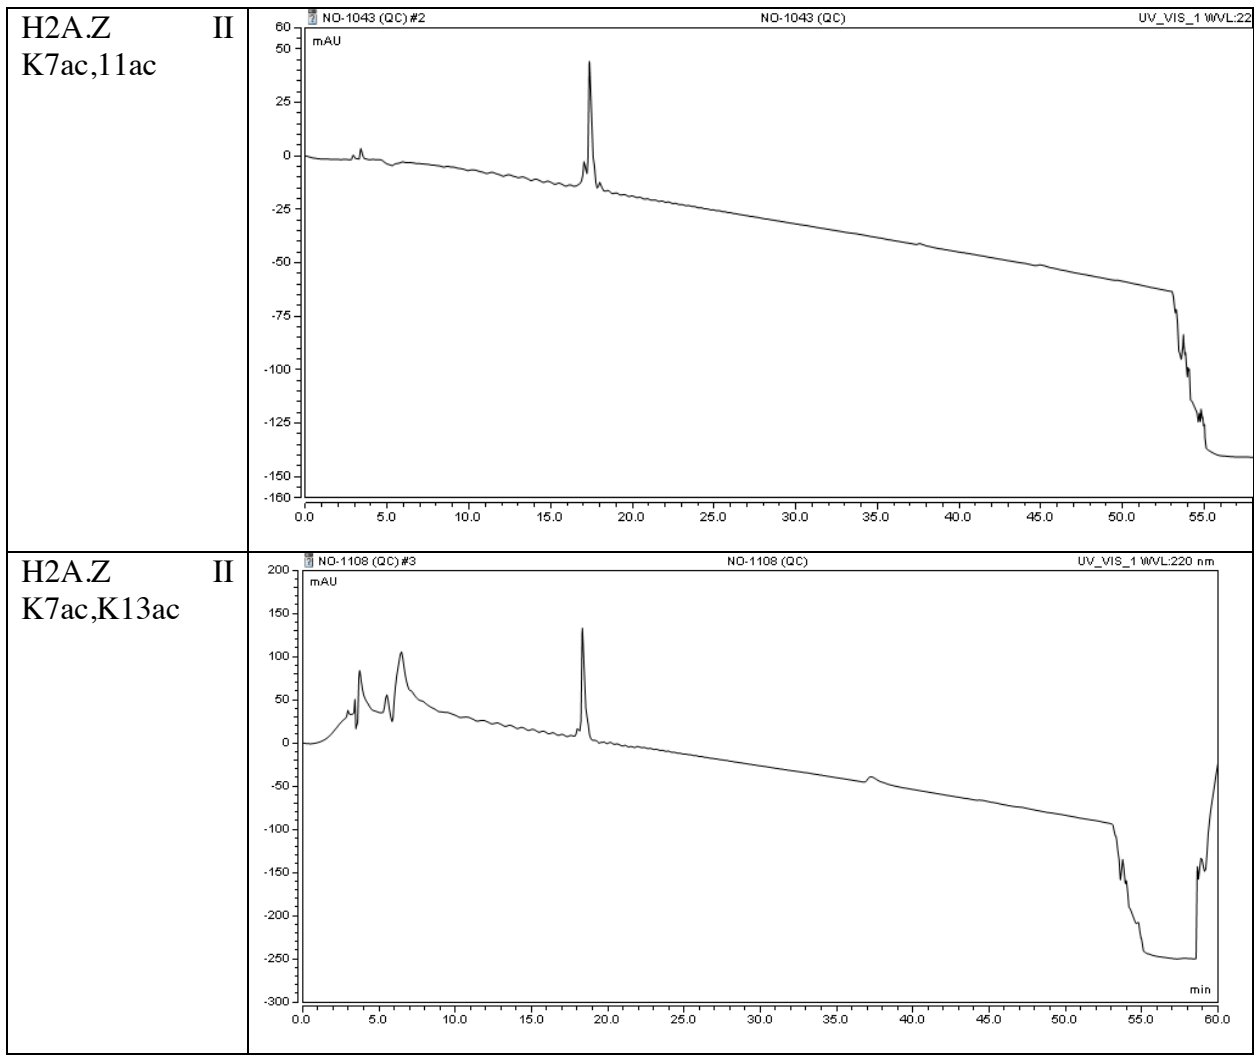

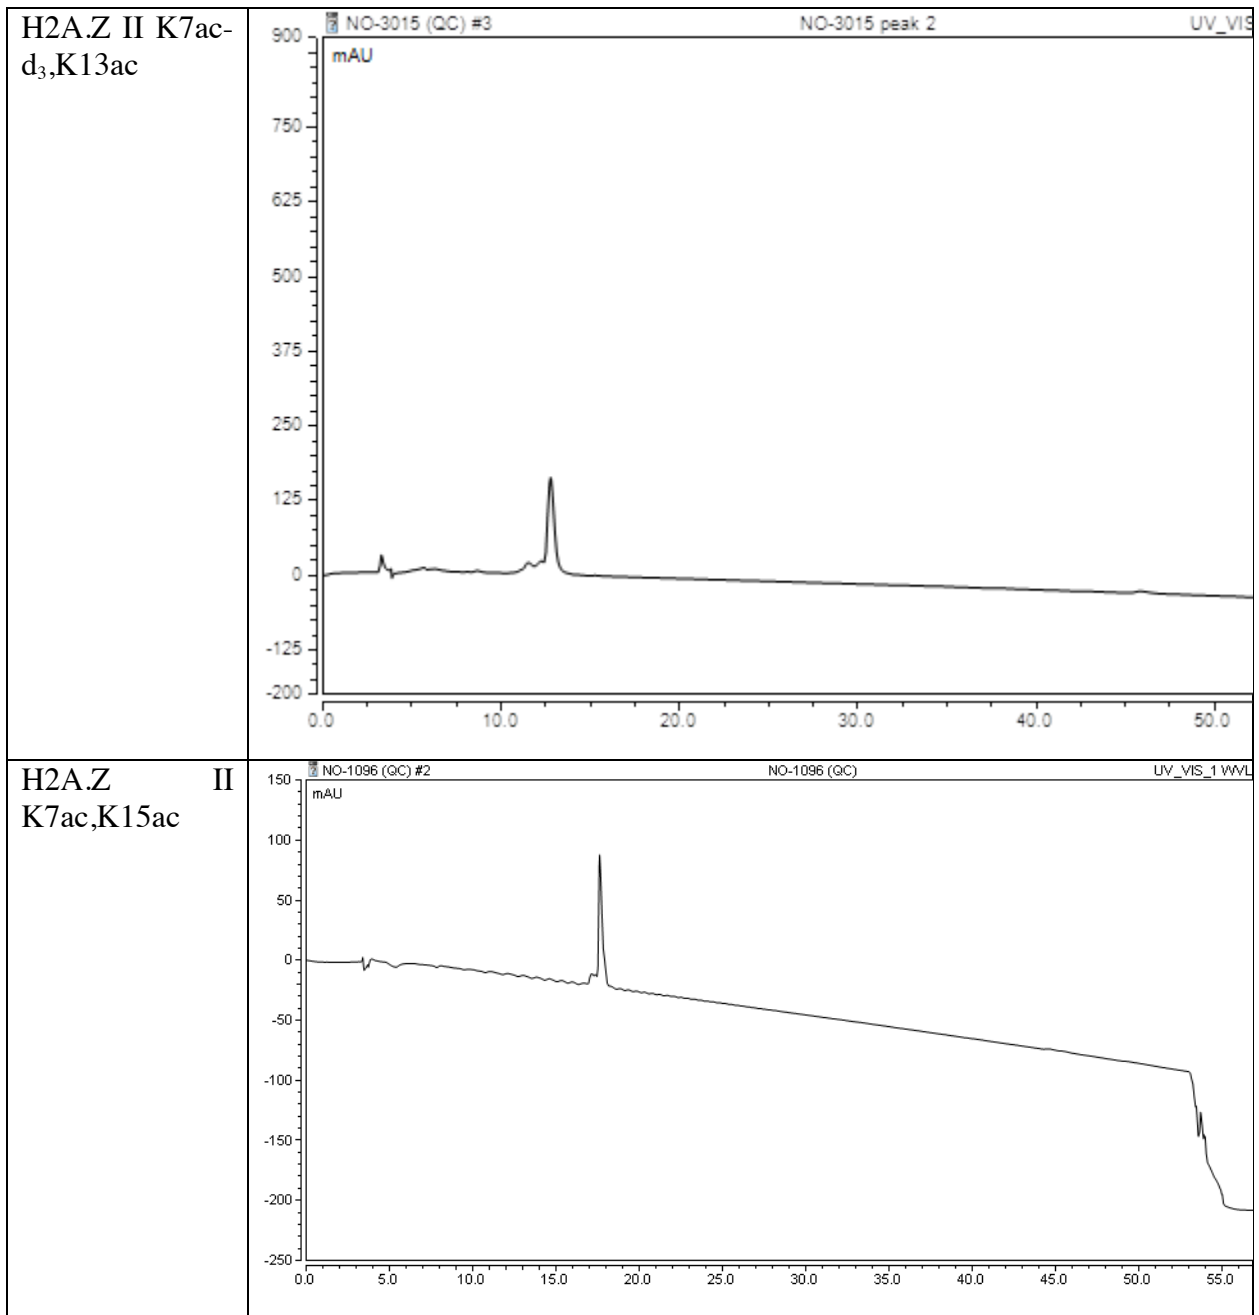

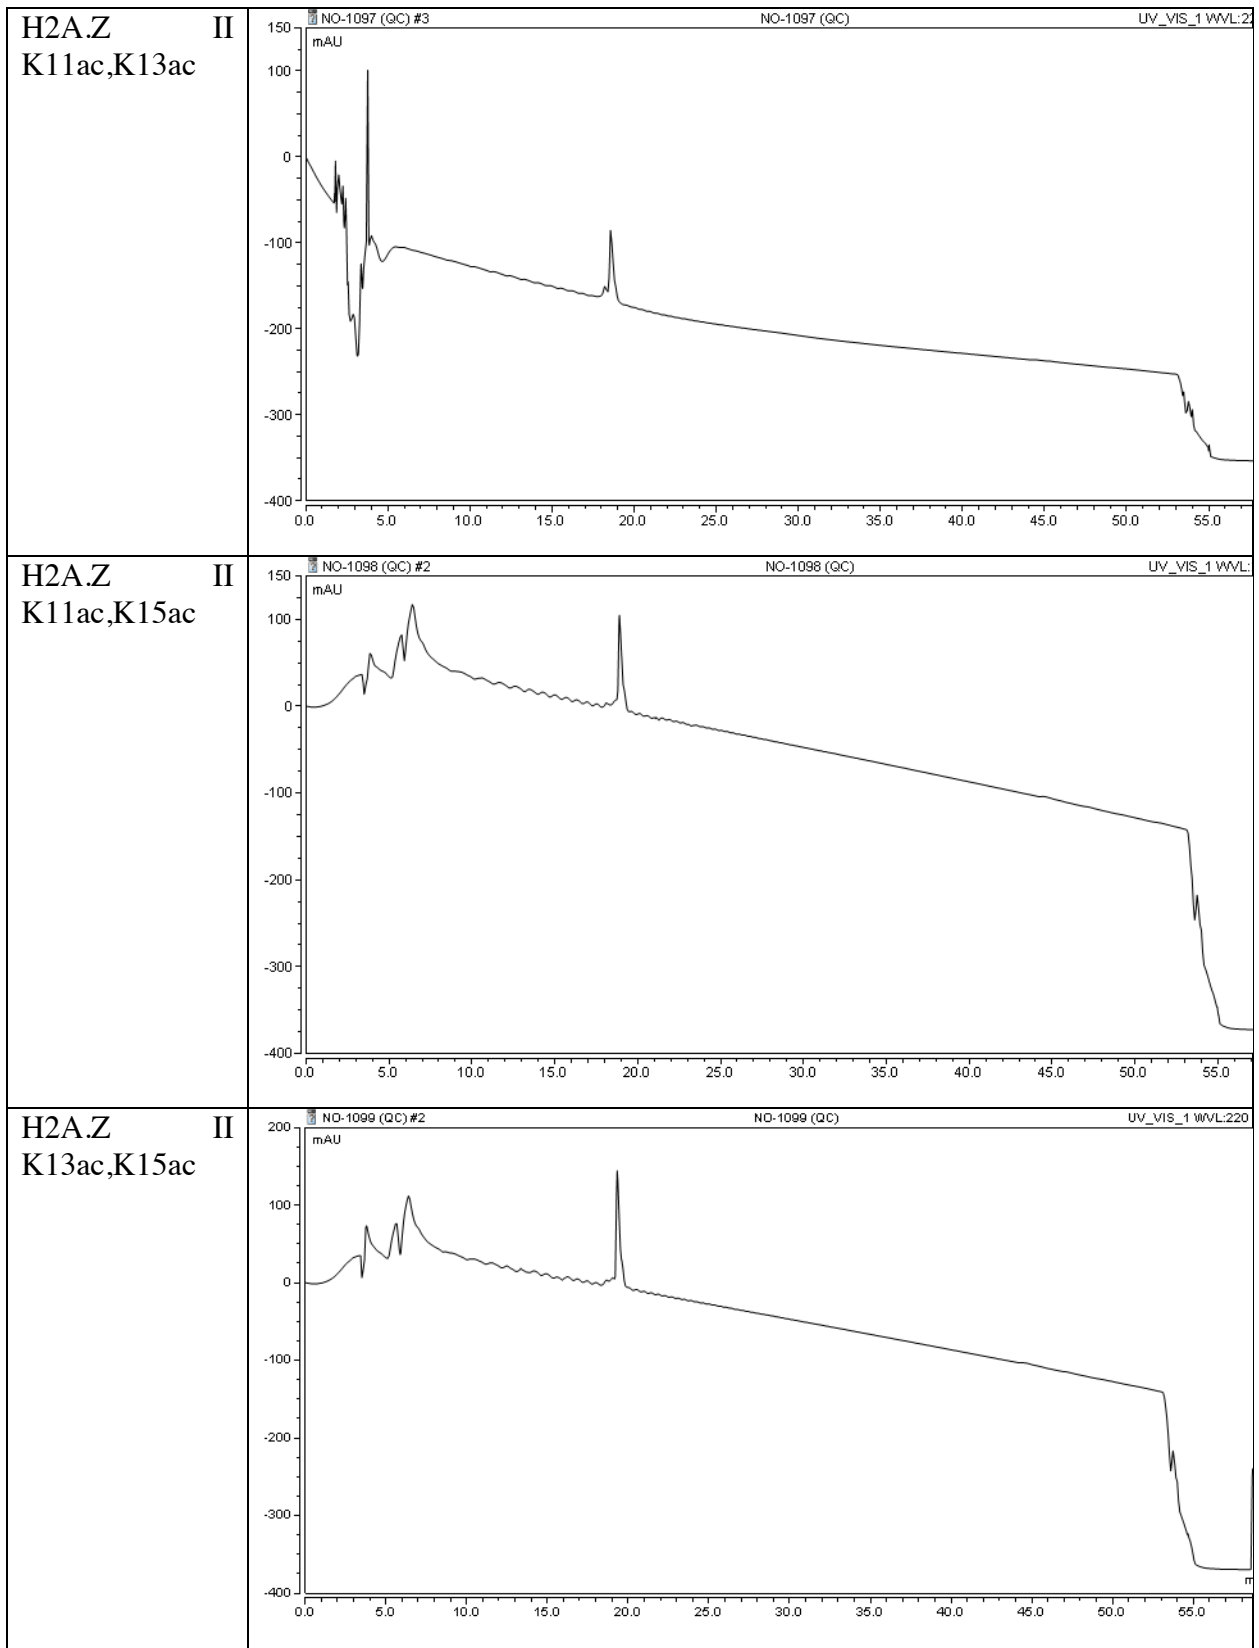

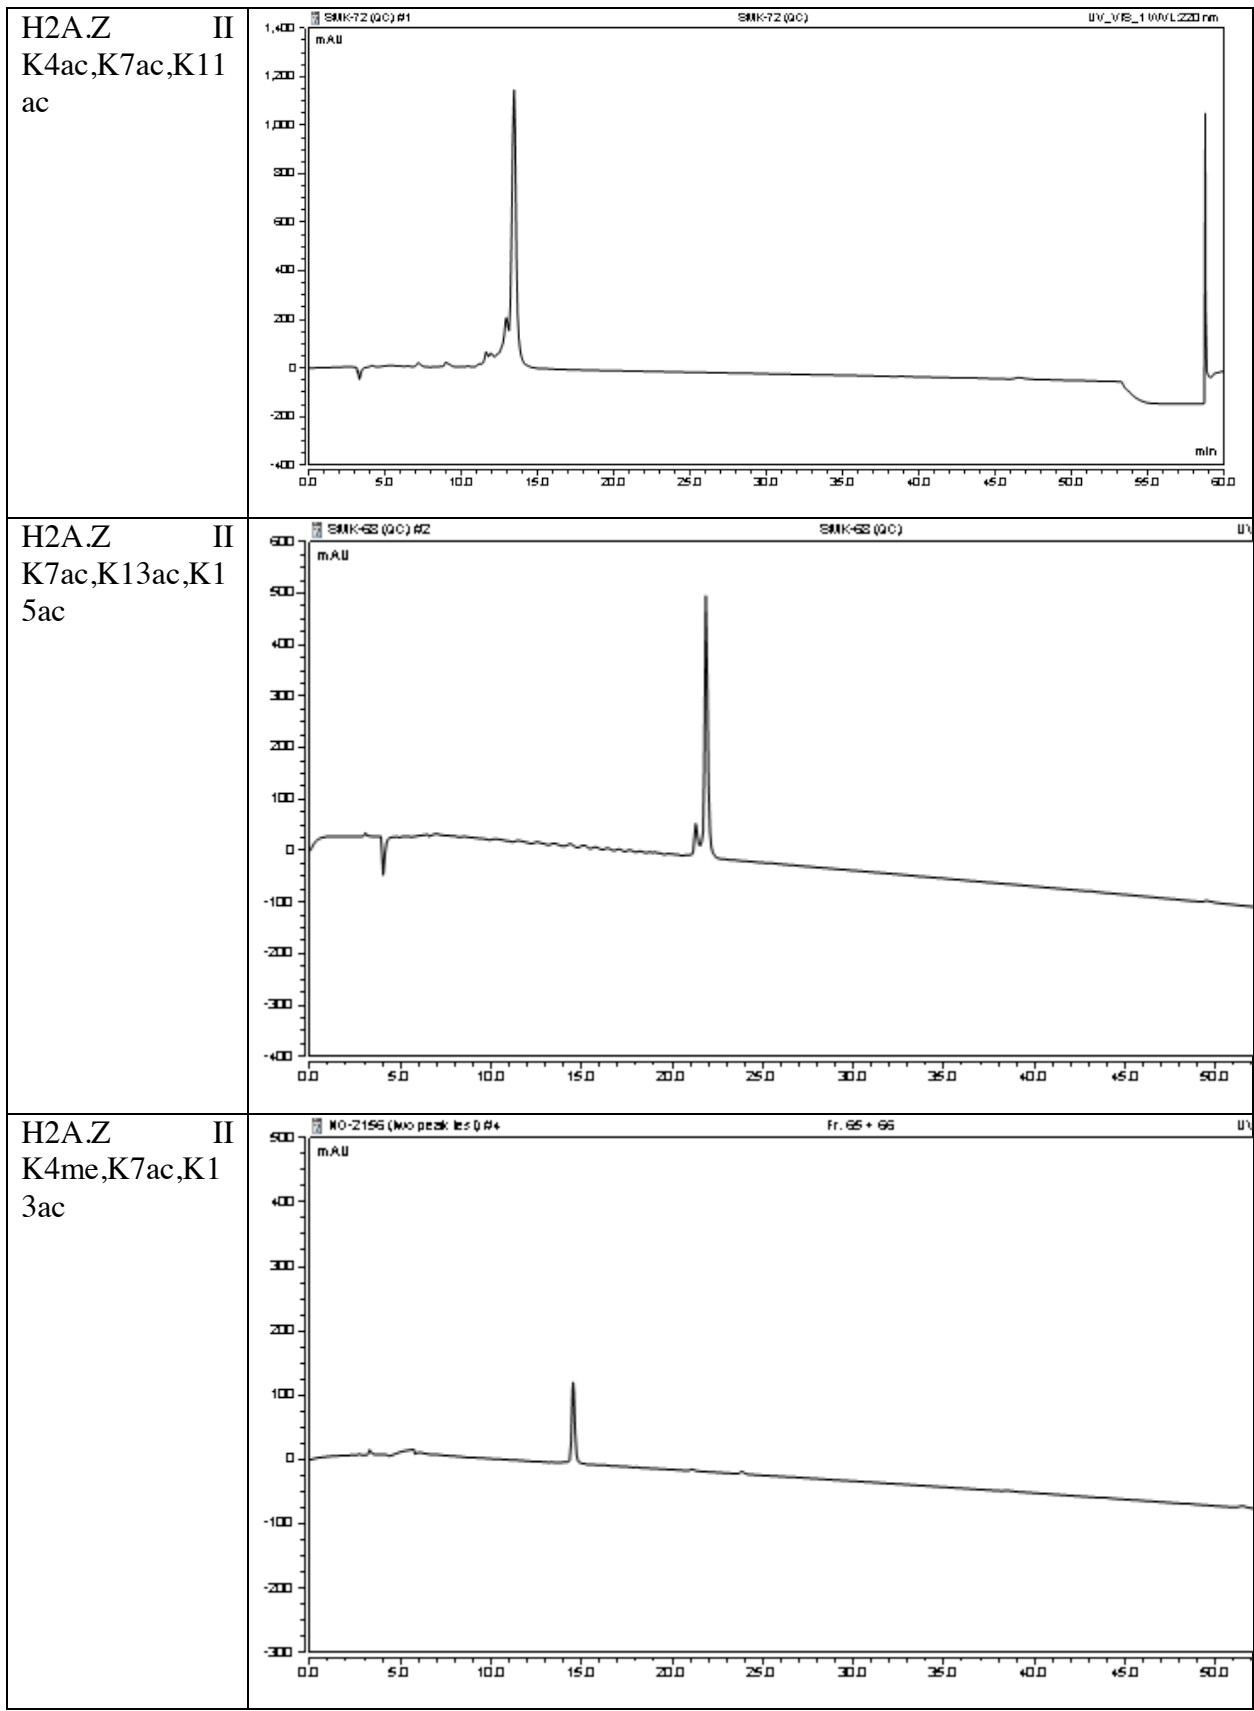

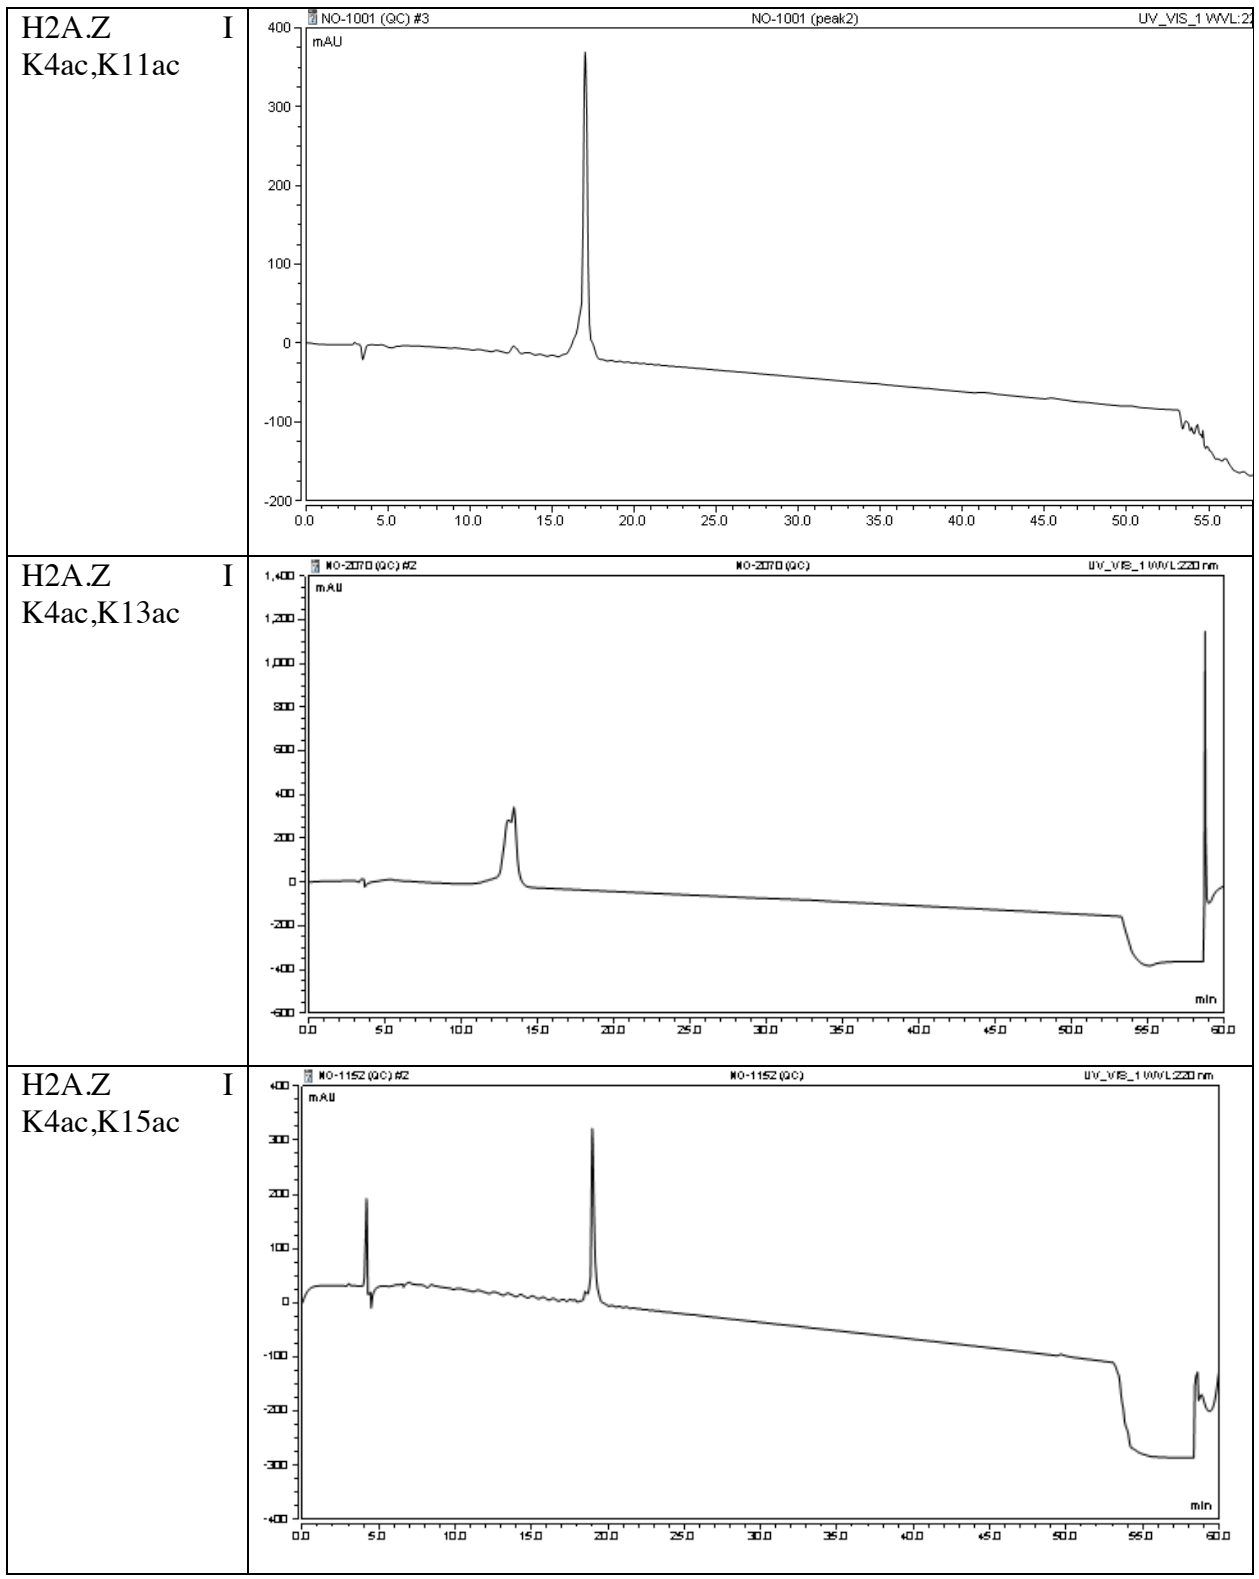

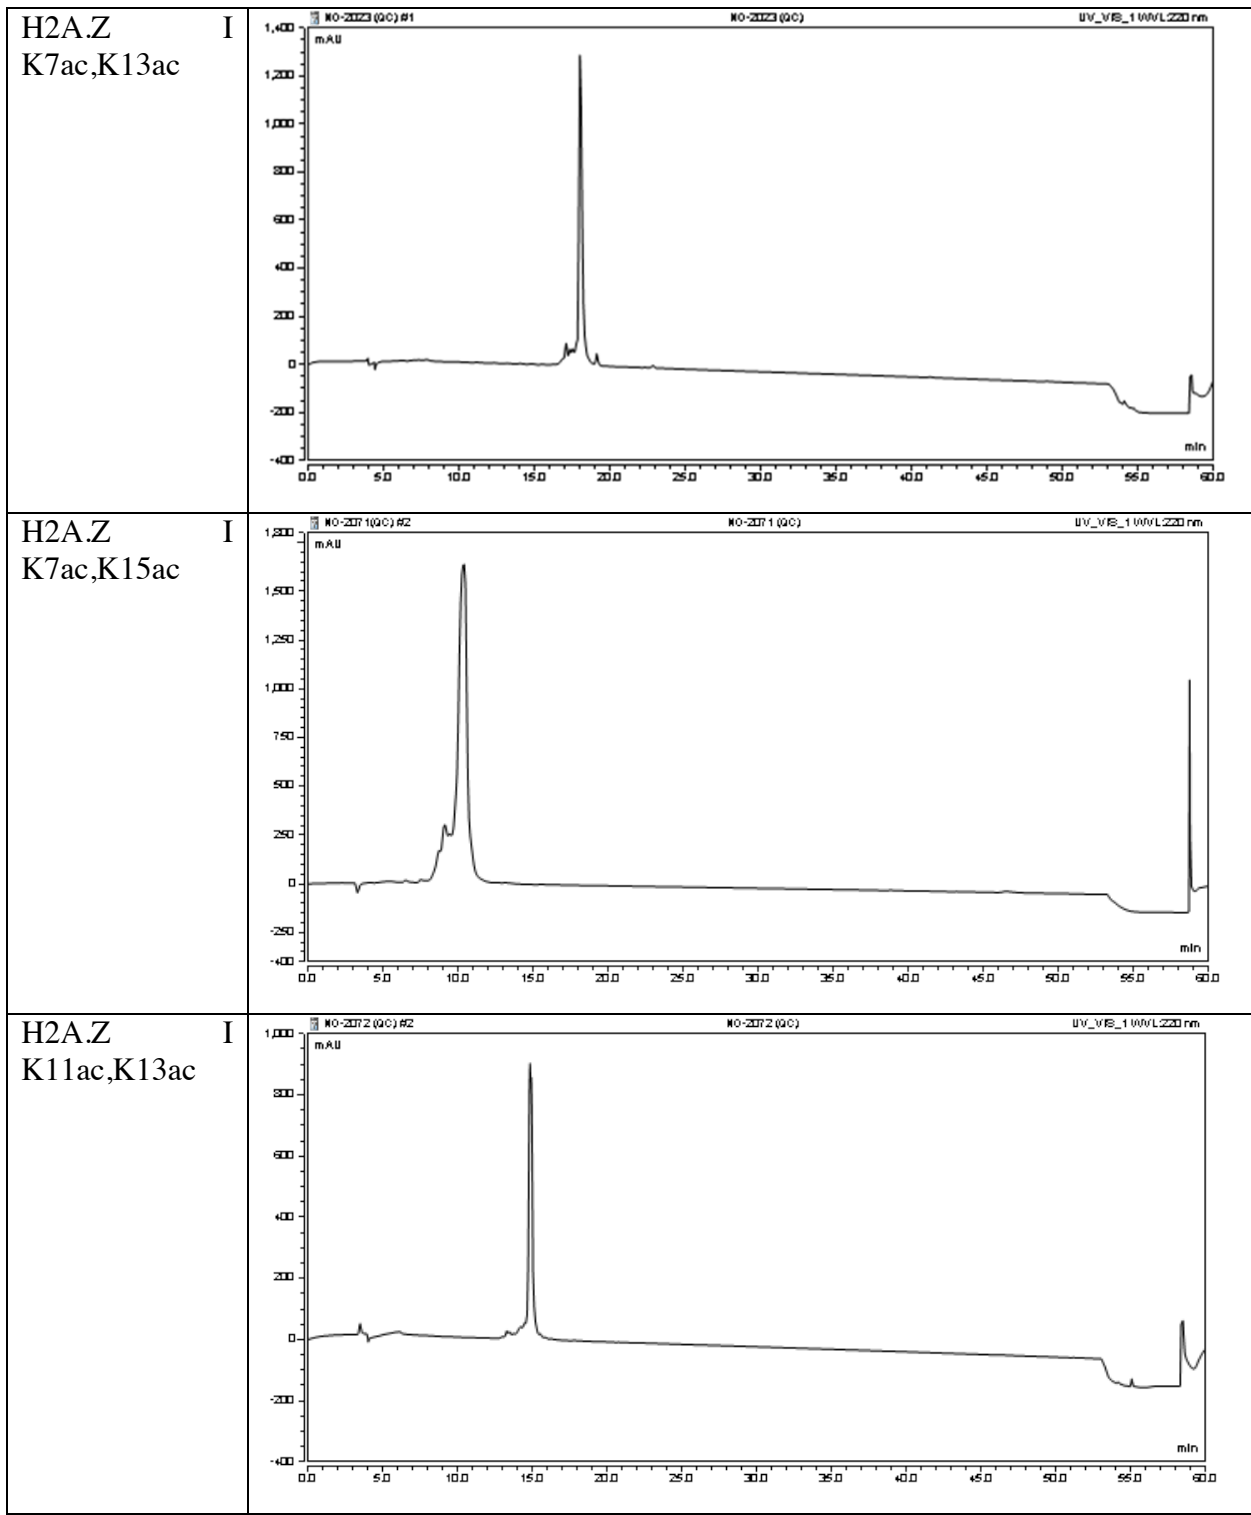

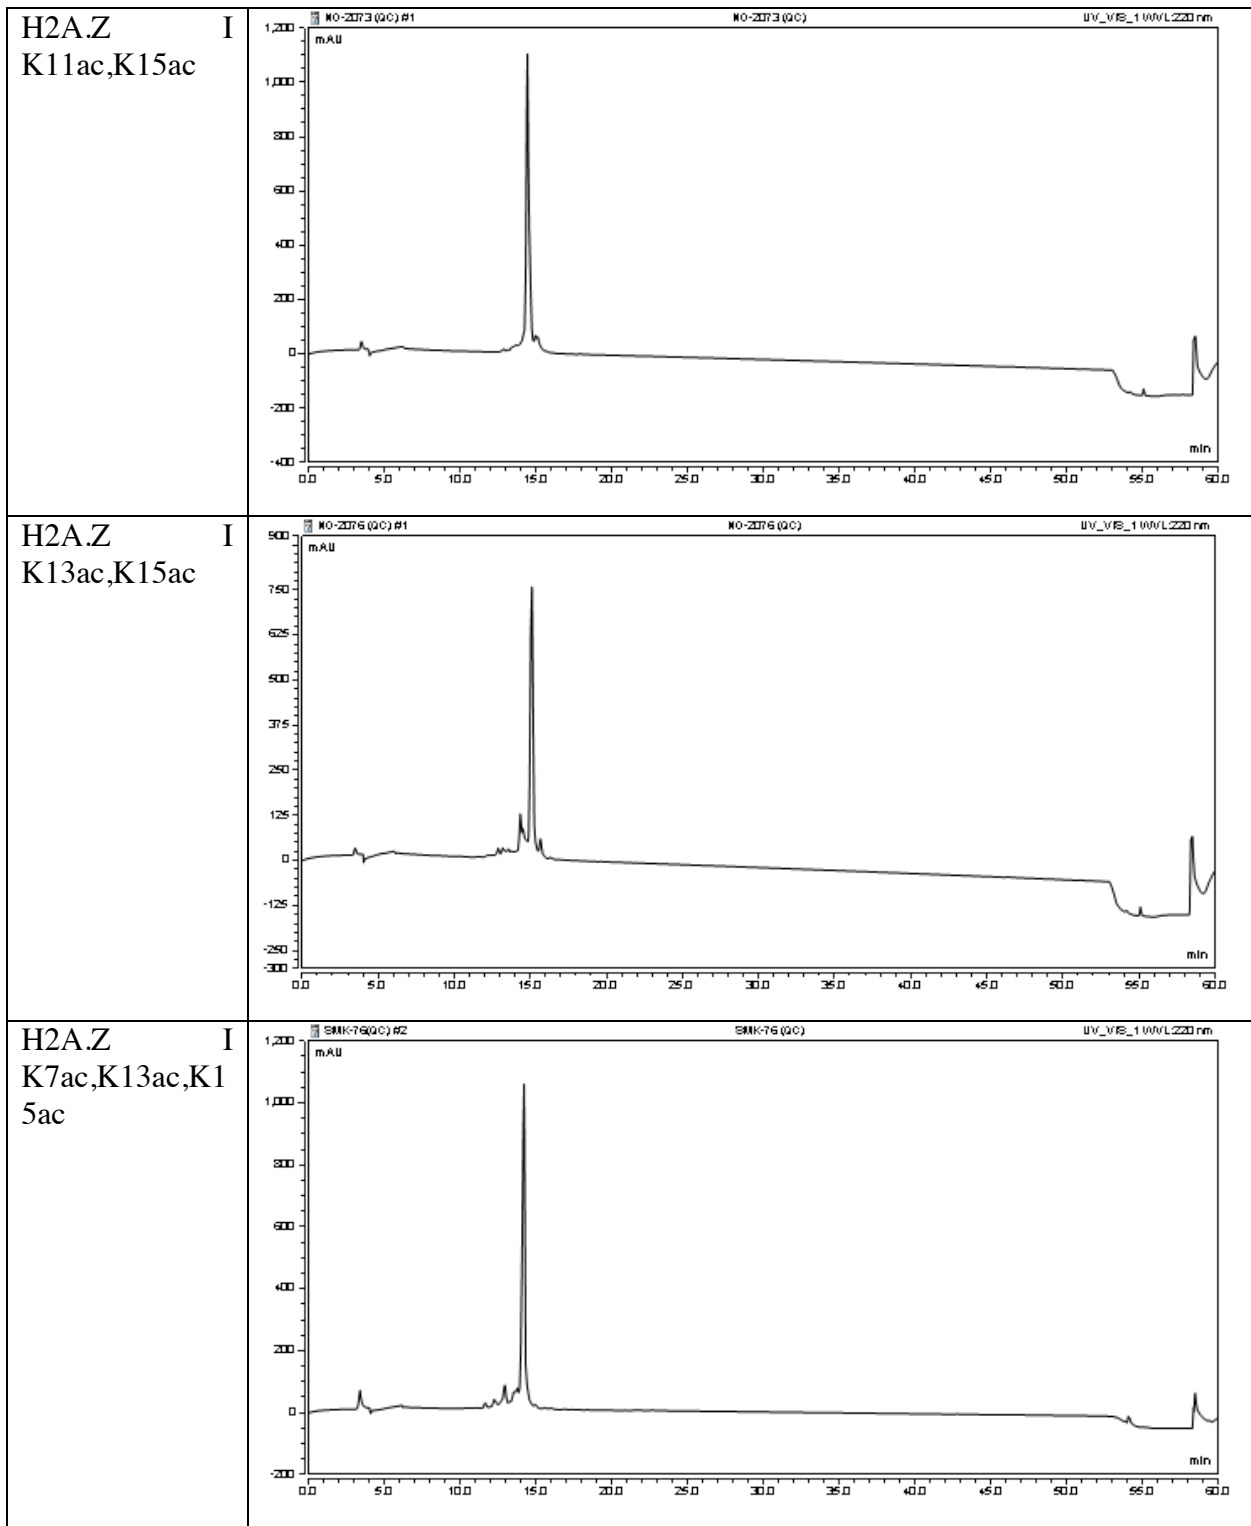



## PrOF NMR Titrations with 5FW-BPTF.

PrOF NMR titration with 5FW-BPTF and H4 K16ac peptide.

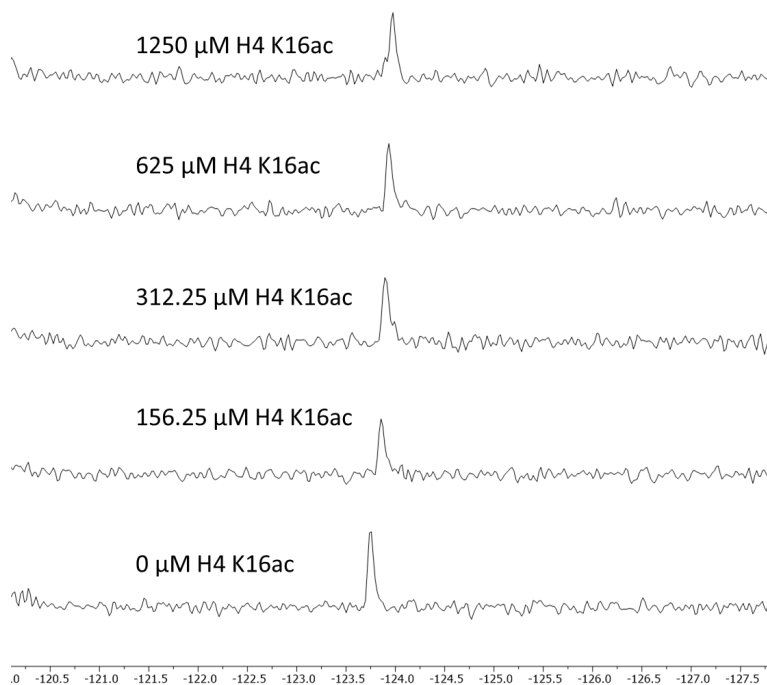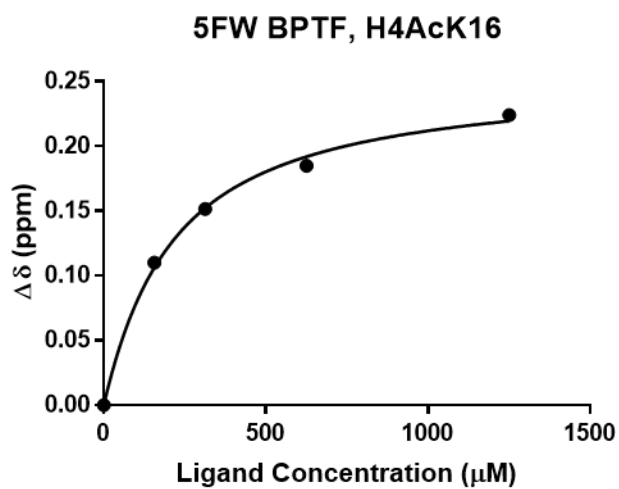

| [Ligand]             | 5FW 2950 (ppm) | $\Delta\delta$ |
|----------------------|----------------|----------------|
| 0 $\mu\text{M}$      | -123.7473      |                |
| 156.25 $\mu\text{M}$ | -123.8571      | -0.1098        |
| 312.5 $\mu\text{M}$  | -123.8989      | -0.1516        |
| 625 $\mu\text{M}$    | -123.9329      | -0.1856        |
| 1250 $\mu\text{M}$   | -123.972       | -0.2247        |

PrOF NMR titration with 5FW-BPTF and H2A.Z II unacetylated peptide.

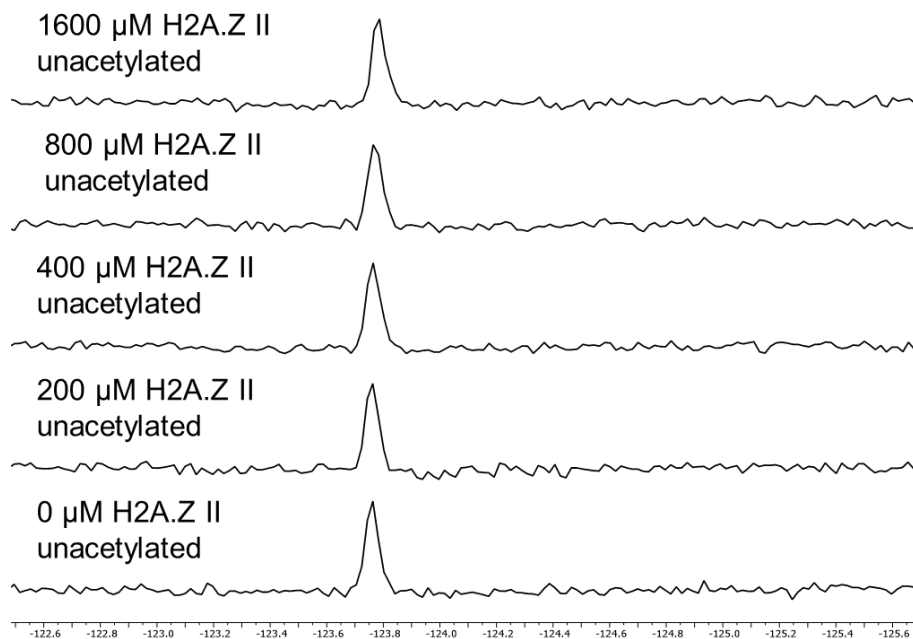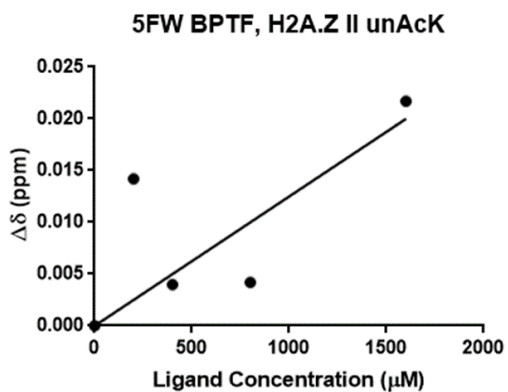

| [Ligand]           | 5FW 2950 (ppm) | $\Delta\delta$ |
|--------------------|----------------|----------------|
| 0 $\mu\text{M}$    | -123.7598      |                |
| 200 $\mu\text{M}$  | -123.7591      | 0.0007         |
| 400 $\mu\text{M}$  | -123.7629      | -0.0031        |
| 800 $\mu\text{M}$  | -123.7692      | -0.0094        |
| 1600 $\mu\text{M}$ | -123.7815      | -0.0217        |

PrOF NMR titration with 5FW-BPTF and H2A.Z II K4ac peptide.

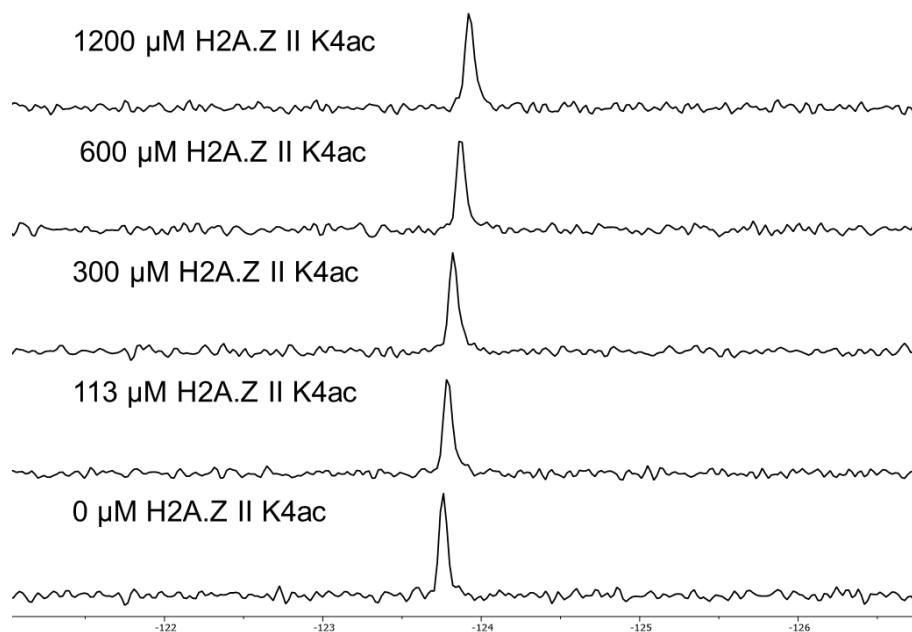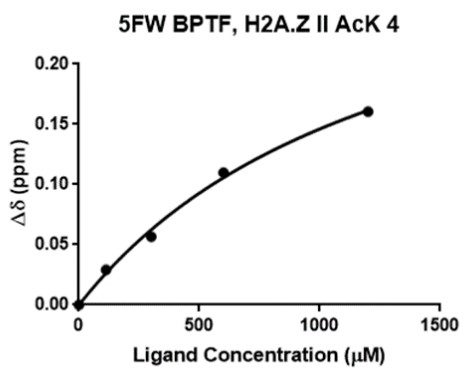

| [Ligand] | 5FW 2950 (ppm) | Δδ      |
|----------|----------------|---------|
| 0 μM     | -123.7588      |         |
| 113 μM   | -123.7868      | -0.028  |
| 300 μM   | -123.8219      | -0.0631 |
| 600 μM   | -123.8688      | -0.11   |
| 1200 μM  | -123.9238      | -0.165  |

PrOF NMR titration with 5FW-BPTF and H2A.Z II K7ac peptide.

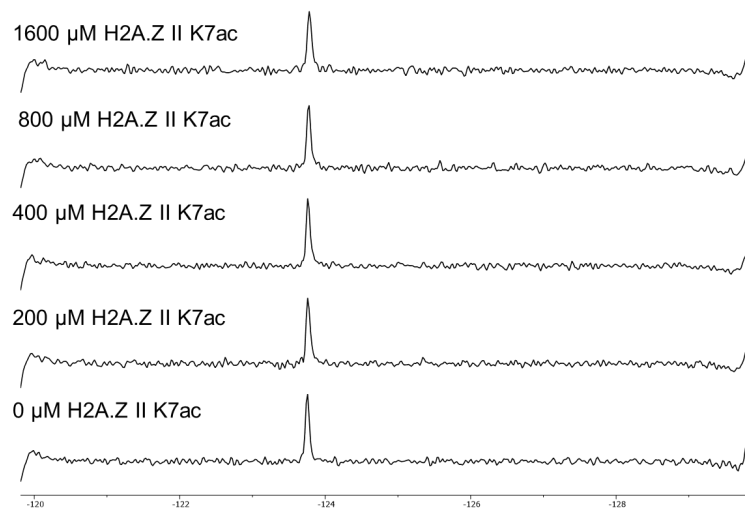

5FW BPTF, H2A.Z II K7ac

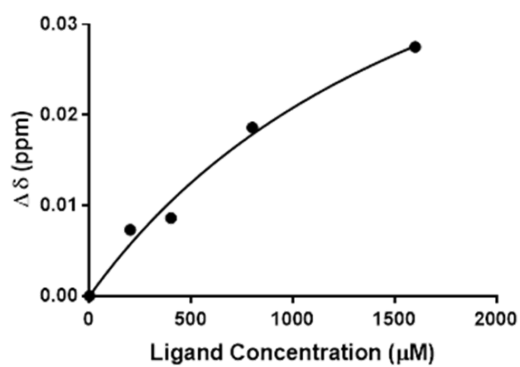

| [Ligand] | 5FW 2950 (ppm) | Δδ      |
|----------|----------------|---------|
| 0 μM     | -123.7546      |         |
| 200 μM   | -123.7619      | -0.0073 |
| 400 μM   | -123.7632      | -0.0086 |
| 800 μM   | -123.7732      | -0.0186 |
| 1600 μM  | -123.7821      | -0.0275 |

PrOF NMR titration with 5FW-BPTF and H2A.Z II K11ac peptide.

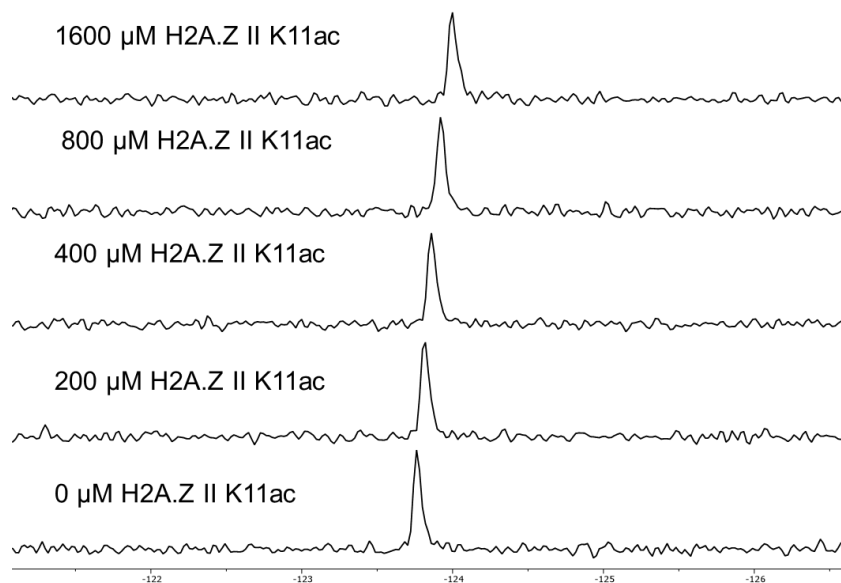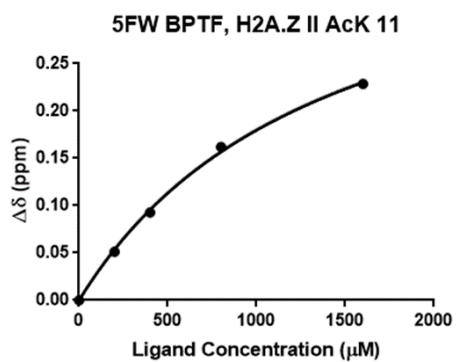

| [Ligand]           | 5FW 2950 (ppm) | $\Delta\delta$ |
|--------------------|----------------|----------------|
| 0 $\mu\text{M}$    | -123.7635      |                |
| 200 $\mu\text{M}$  | -123.8136      | -0.0501        |
| 400 $\mu\text{M}$  | -123.8591      | -0.0956        |
| 800 $\mu\text{M}$  | -123.9223      | -0.1588        |
| 1600 $\mu\text{M}$ | -123.996       | -0.2325        |

PrOF NMR titration with 5FW-BPTF and H2A.Z II K13ac peptide.

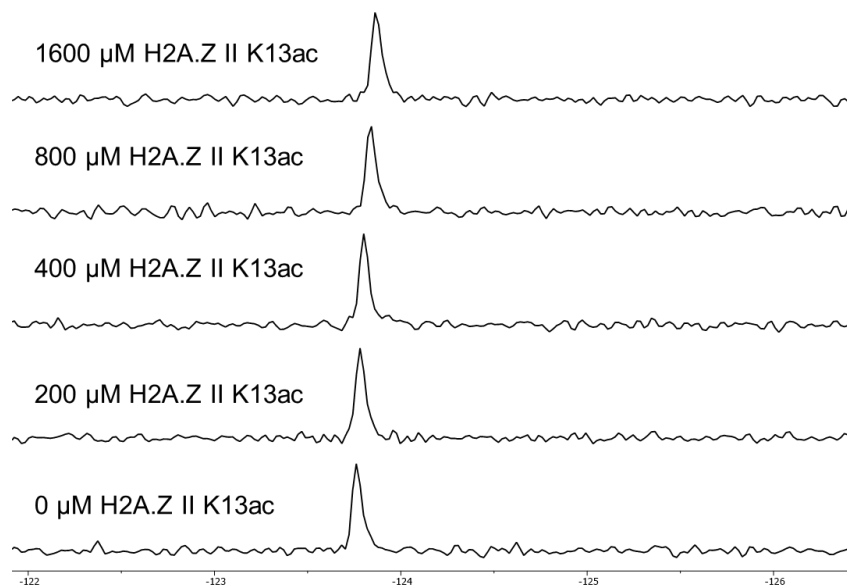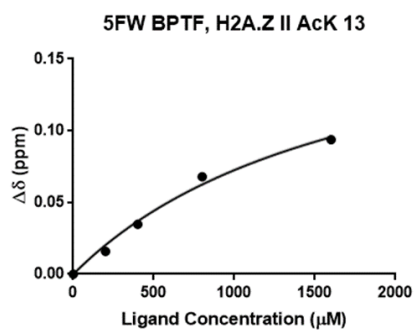

| [Ligand]           | 5FW 2950 (ppm) | $\Delta\delta$ |
|--------------------|----------------|----------------|
| 0 $\mu\text{M}$    | -123.7621      |                |
| 200 $\mu\text{M}$  | -123.7818      | -0.0197        |
| 400 $\mu\text{M}$  | -123.8017      | -0.0396        |
| 800 $\mu\text{M}$  | -123.8377      | -0.0756        |
| 1600 $\mu\text{M}$ | -123.8658      | -0.1037        |

PrOF NMR titration with 5FW-BPTF and H2A.Z II K15ac peptide.

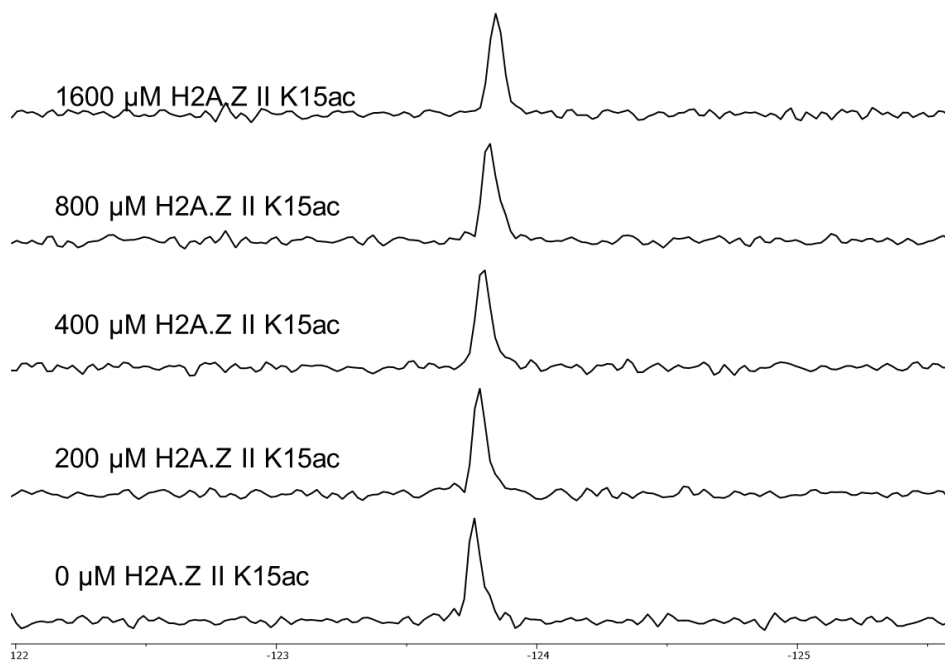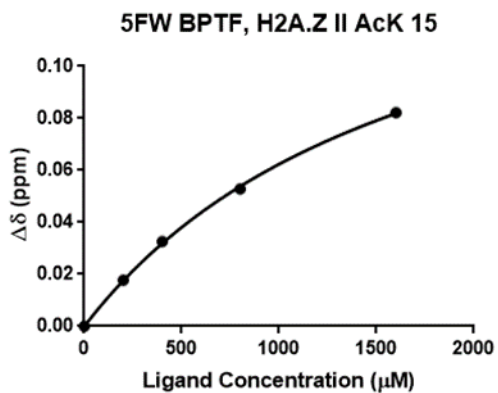

| [Ligand] | 5FW 2950 (ppm) | Δδ      |
|----------|----------------|---------|
| 0 μM     | -123.7594      |         |
| 200 μM   | -123.7785      | -0.0191 |
| 400 μM   | -123.7932      | -0.0338 |
| 800 μM   | -123.8152      | -0.0558 |
| 1600 μM  | -123.843       | -0.0836 |

PrOF NMR titration with 5FW-BPTF and H2A.Z II K4ac,K7ac peptide.

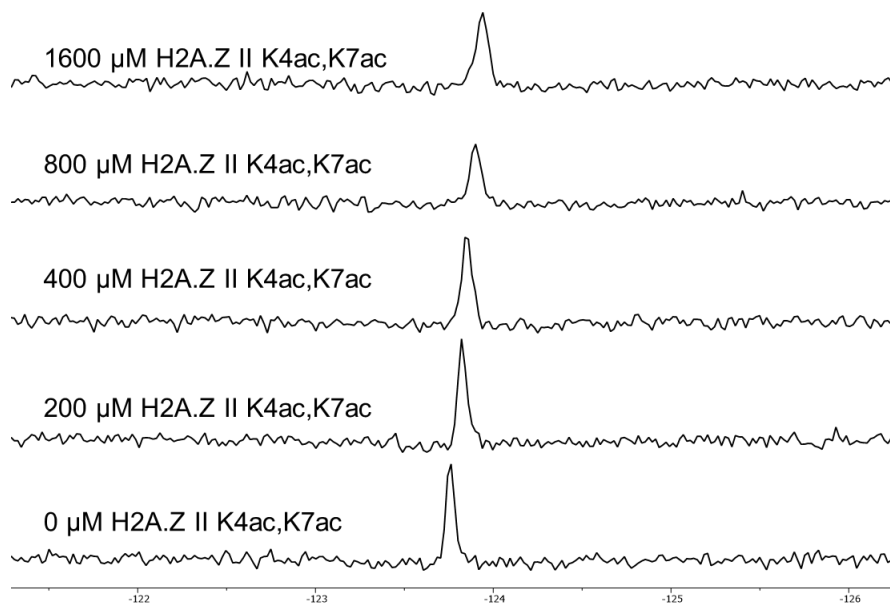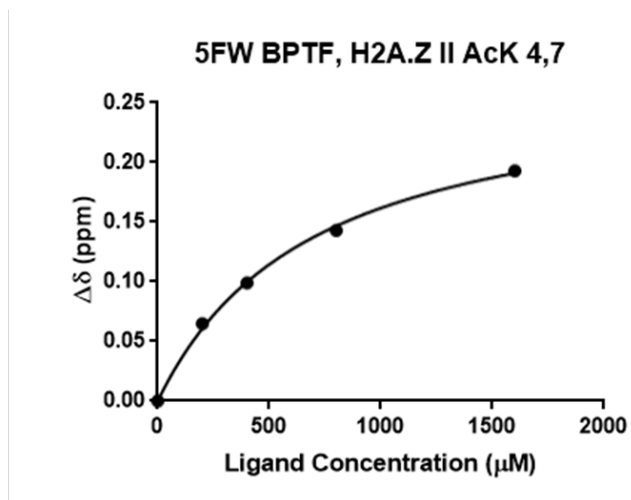

| [Ligand] | 5FW 2950 (ppm) | Δδ      |
|----------|----------------|---------|
| 0 μM     | -123.7577      |         |
| 200 μM   | -123.8234      | -0.0657 |
| 400 μM   | -123.8497      | -0.092  |
| 800 μM   | -123.8985      | -0.1408 |
| 1600 μM  | -123.9389      | -0.1812 |



PrOF NMR titration with 5FW-BPTF and H2A.Z II K4ac,K11ac peptide.

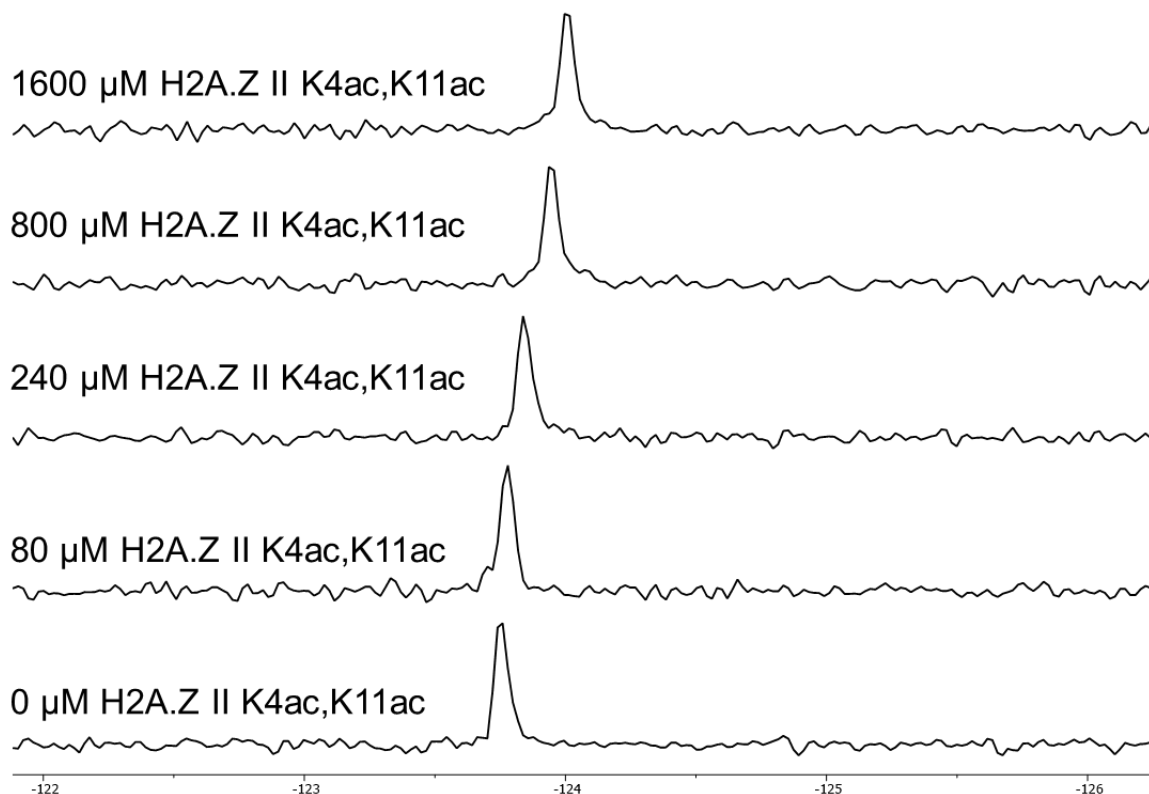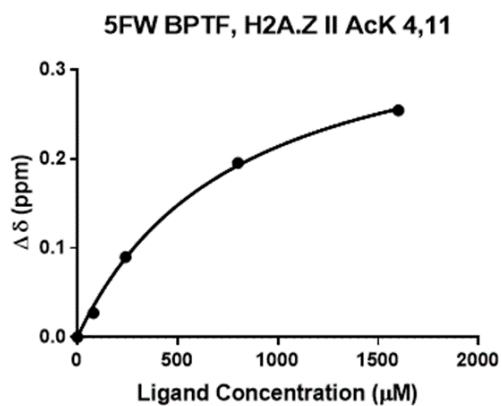

| [Ligand] | 5FW 2950 (ppm) | Δδ      |
|----------|----------------|---------|
| 0 μM     | -123.7515      |         |
| 80 μM    | -123.7769      | -0.0254 |
| 240 μM   | -123.8401      | -0.0886 |
| 800 μM   | -123.9451      | -0.1936 |
| 1600 μM  | -124.0058      | -0.2543 |

PrOF NMR titration with 5FW-BPTF and H2A.Z II K4ac,K13ac peptide.

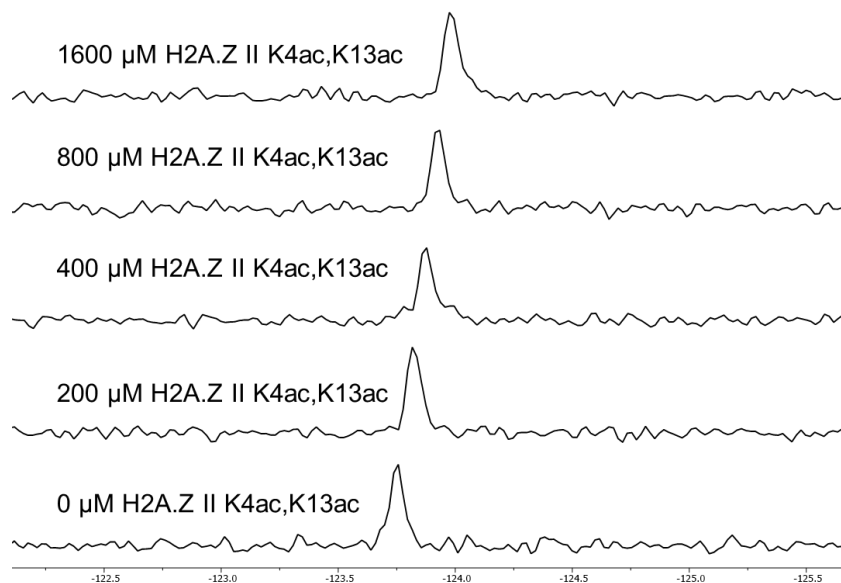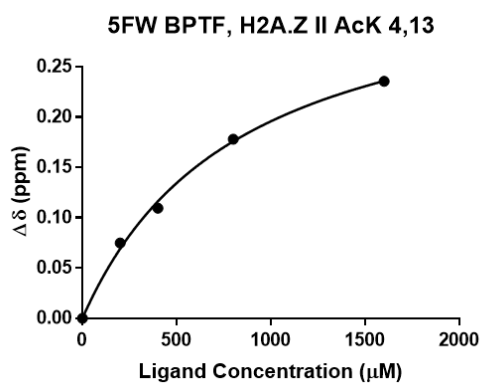

| [Ligand] | 5FW 2950 (ppm) | Δδ      |
|----------|----------------|---------|
| 0 μM     | -123.7515      |         |
| 200 μM   | -123.8204      | -0.0689 |
| 400 μM   | -123.8724      | -0.1209 |
| 800 μM   | -123.9254      | -0.1739 |
| 1600 μM  | -123.9803      | -0.2288 |

PrOF NMR titration with 5FW-BPTF and H2A.Z II K4ac,K15ac peptide.

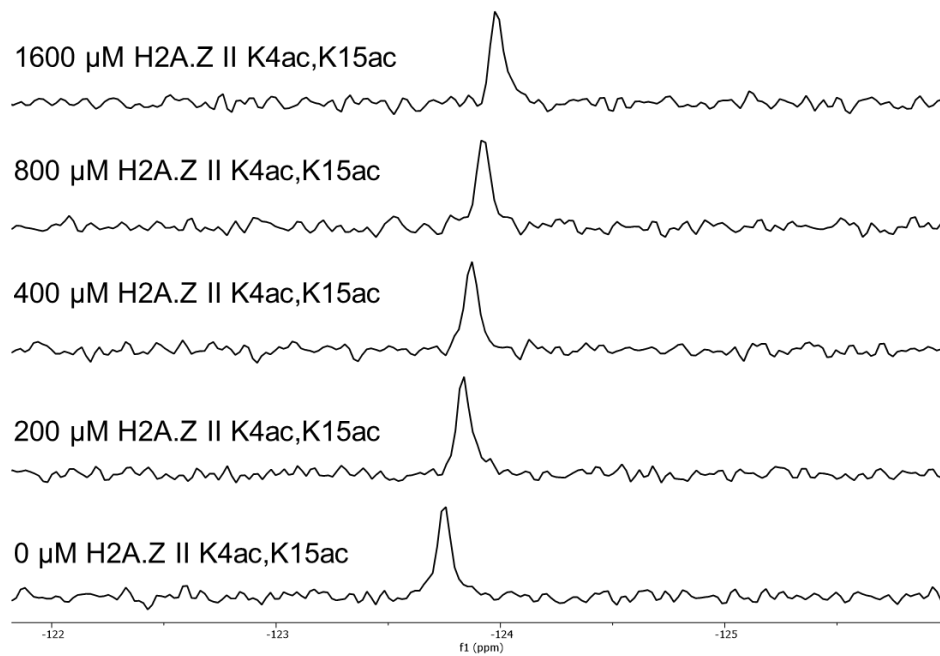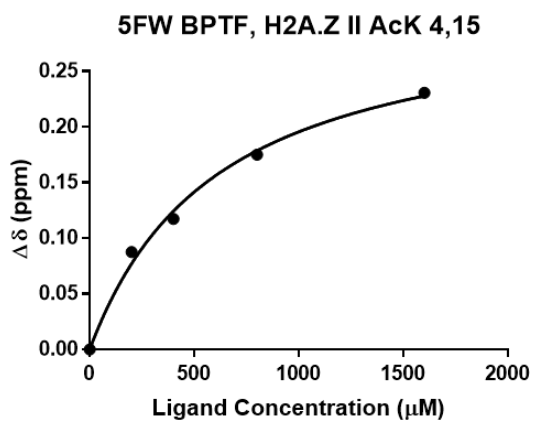

| [Ligand] | 5FW 2950 (ppm) | Δδ      |
|----------|----------------|---------|
| 0 μM     | -123.7474      |         |
| 200 μM   | -123.8335      | -0.0861 |
| 400 μM   | -123.8707      | -0.1233 |
| 800 μM   | -123.9226      | -0.1752 |
| 1600 μM  | -123.9807      | -0.2333 |

PrOF NMR titration with 5FW-BPTF and H2A.Z II K7ac,K11ac peptide.

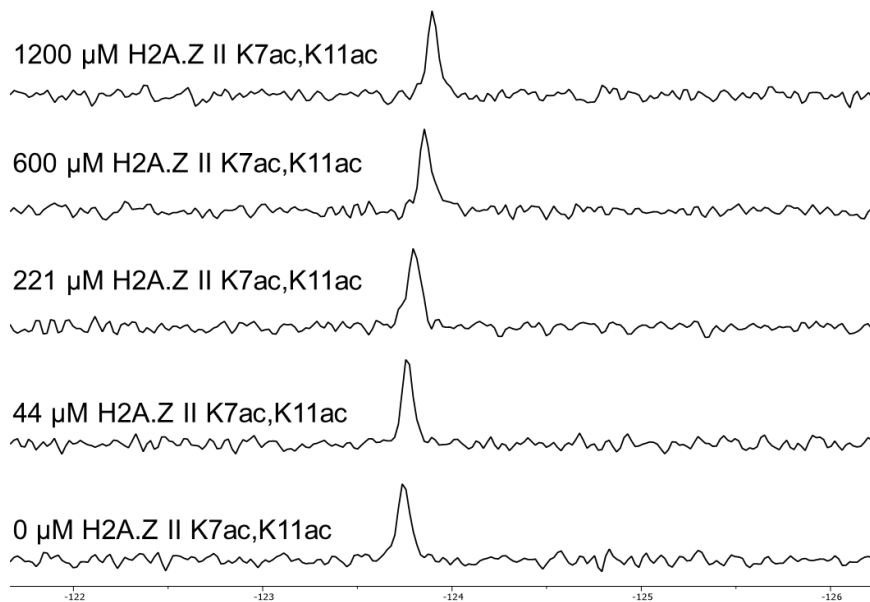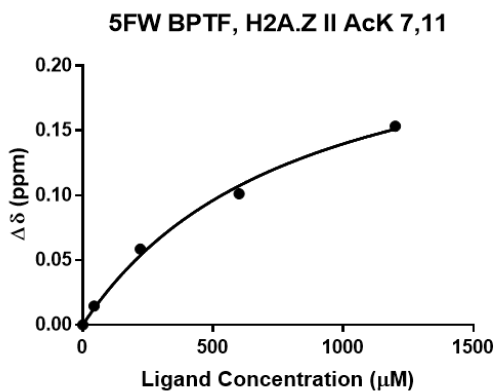

| [Ligand]           | 5FW 2950 (ppm) | $\Delta\delta$ |
|--------------------|----------------|----------------|
| 0 $\mu\text{M}$    | -123.743       |                |
| 44 $\mu\text{M}$   | -123.7629      | -0.0199        |
| 221 $\mu\text{M}$  | -123.7979      | -0.0549        |
| 600 $\mu\text{M}$  | -123.8546      | -0.1116        |
| 1200 $\mu\text{M}$ | -123.8964      | -0.1534        |

PrOF NMR titration with 5FW-BPTF and H2A.Z II K7ac,K13ac peptide.

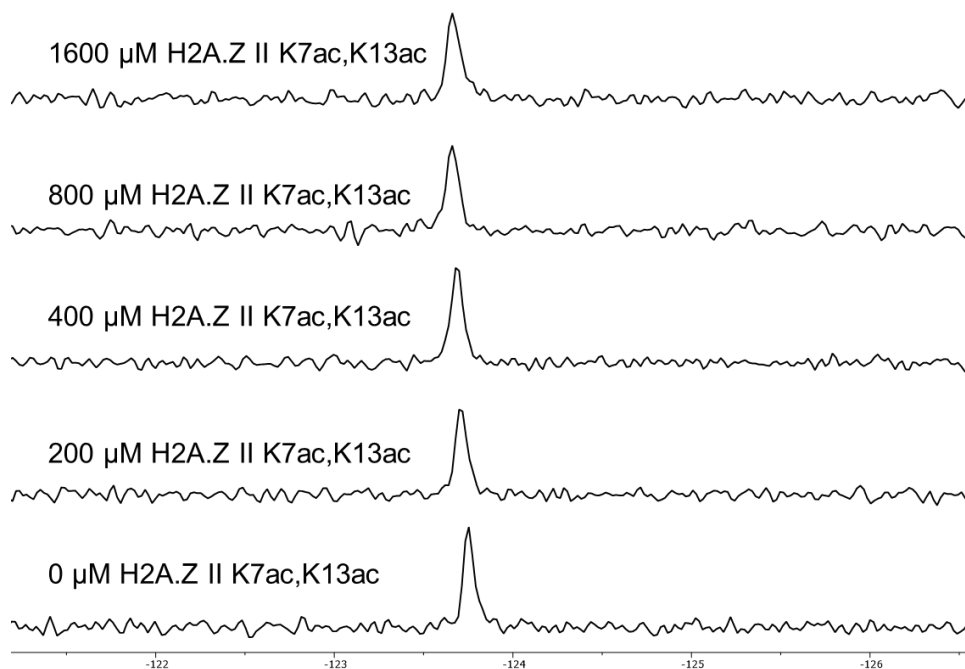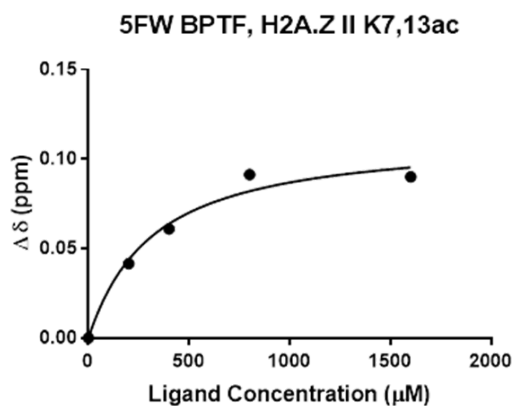

| [Ligand] | 5FW 2950 (ppm) | Δδ     |
|----------|----------------|--------|
| 0 uM     | -123.7488      |        |
| 200 uM   | -123.7072      | 0.0416 |
| 400 uM   | -123.6878      | 0.061  |
| 800 uM   | -123.6575      | 0.0913 |
| 1600 uM  | -123.6587      | 0.0901 |

PrOF NMR titration with 5FW-BPTF and H2A.Z II K7ac,K15ac peptide.

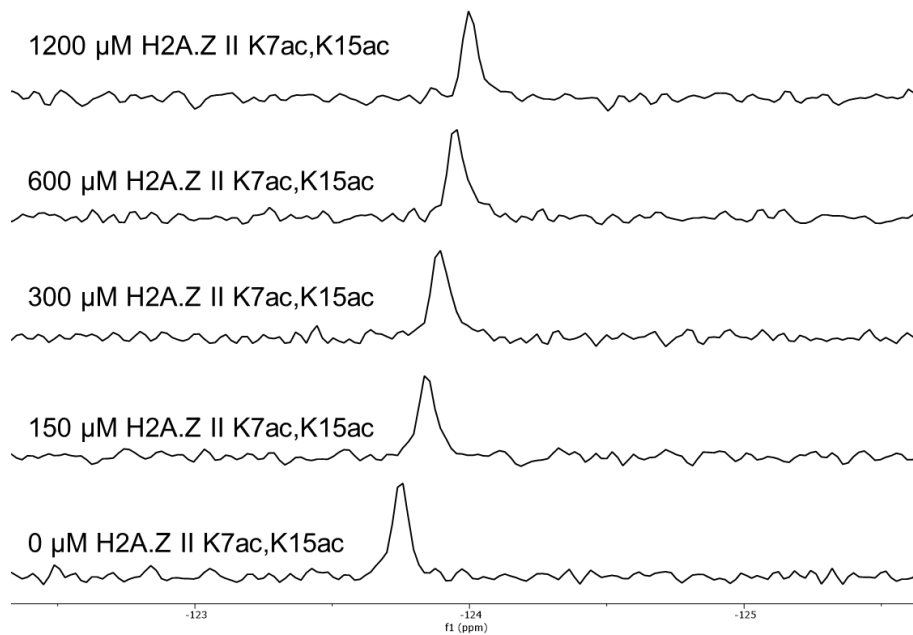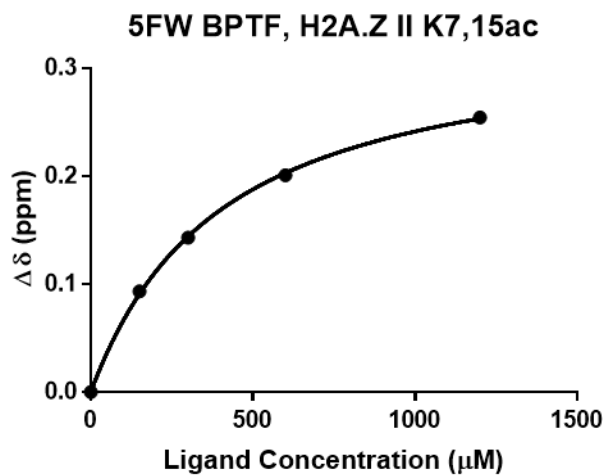

| [Ligand]           | 5FW 2950 (ppm) | $\Delta\delta$ |
|--------------------|----------------|----------------|
| 0 $\mu\text{M}$    | -123.7497      |                |
| 150 $\mu\text{M}$  | -123.8424      | -0.0927        |
| 300 $\mu\text{M}$  | -123.8893      | -0.1396        |
| 600 $\mu\text{M}$  | -123.9475      | -0.1978        |
| 1200 $\mu\text{M}$ | -123.9994      | -0.2497        |

PrOF NMR titration with 5FW-BPTF and H2A.Z II K11ac,K13ac peptide.

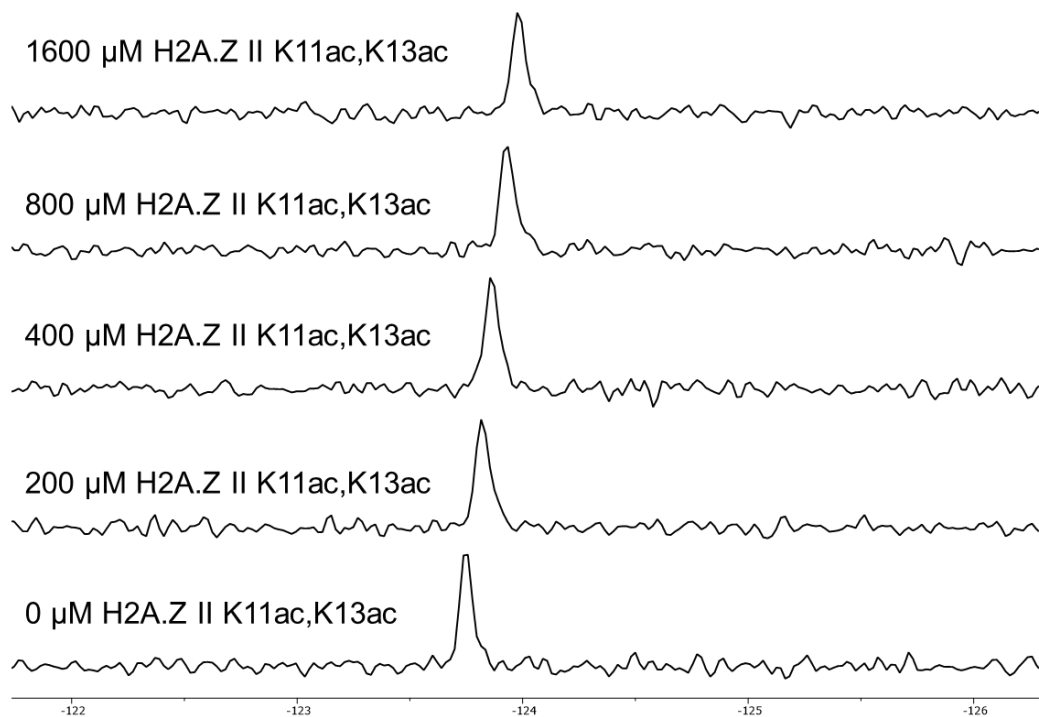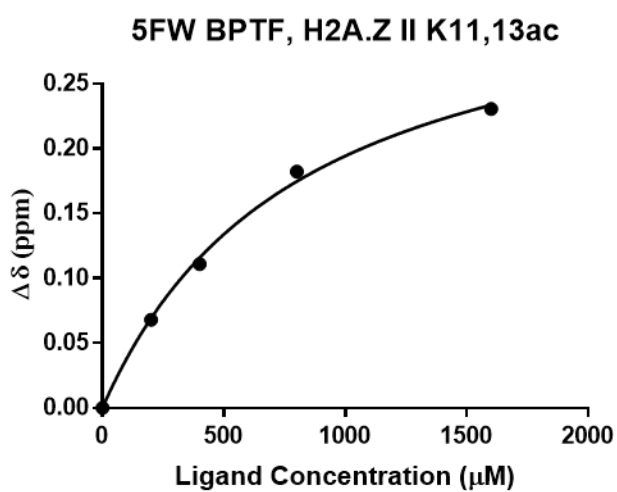

| [Ligand]           | 5FW 2950 (ppm) | $\Delta\delta$ |
|--------------------|----------------|----------------|
| 0 $\mu\text{M}$    | -123.7475      |                |
| 200 $\mu\text{M}$  | -123.8188      | -0.0713        |
| 400 $\mu\text{M}$  | -123.8614      | -0.1139        |
| 800 $\mu\text{M}$  | -123.9279      | -0.1804        |
| 1600 $\mu\text{M}$ | -123.9809      | -0.2334        |

PrOF NMR titration with 5FW-BPTF and H2A.Z II K11ac,K15ac peptide.

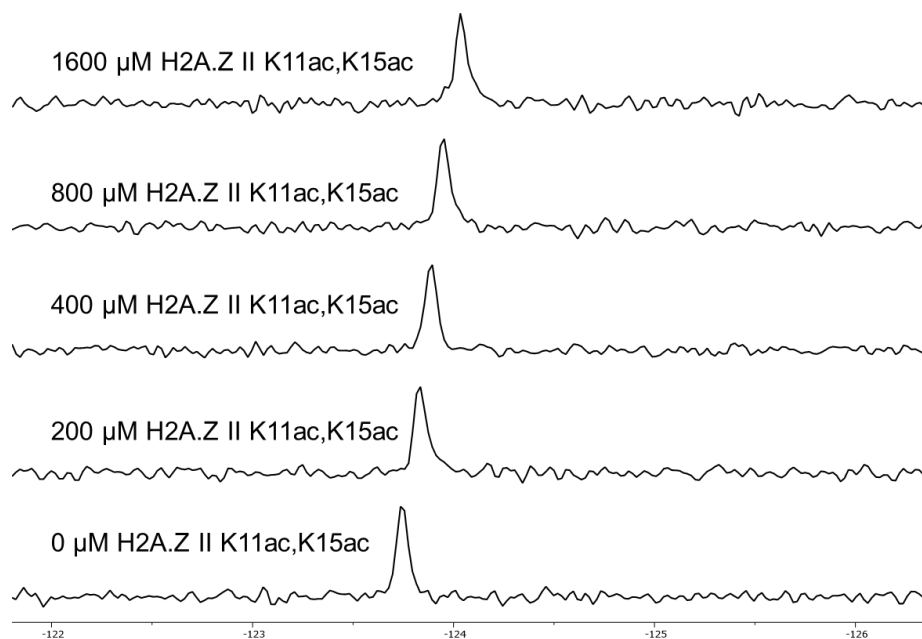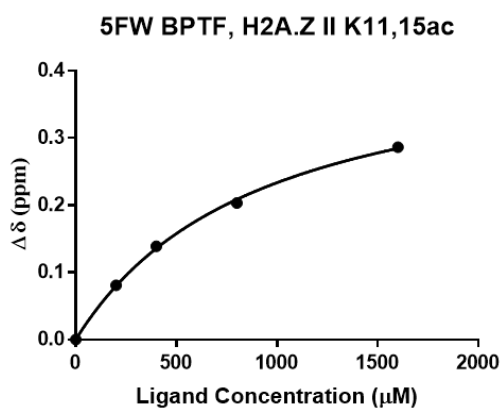

| [Ligand]           | 5FW 2950 (ppm) | $\Delta\delta$ |
|--------------------|----------------|----------------|
| 0 $\mu\text{M}$    | -123.7439      |                |
| 200 $\mu\text{M}$  | -123.8302      | -0.0863        |
| 400 $\mu\text{M}$  | -123.8887      | -0.1448        |
| 800 $\mu\text{M}$  | -123.9482      | -0.2043        |
| 1600 $\mu\text{M}$ | -124.0354      | -0.2915        |



PrOF NMR titration with 5FW-BPTF and H2A.Z II K13ac,K15ac peptide.

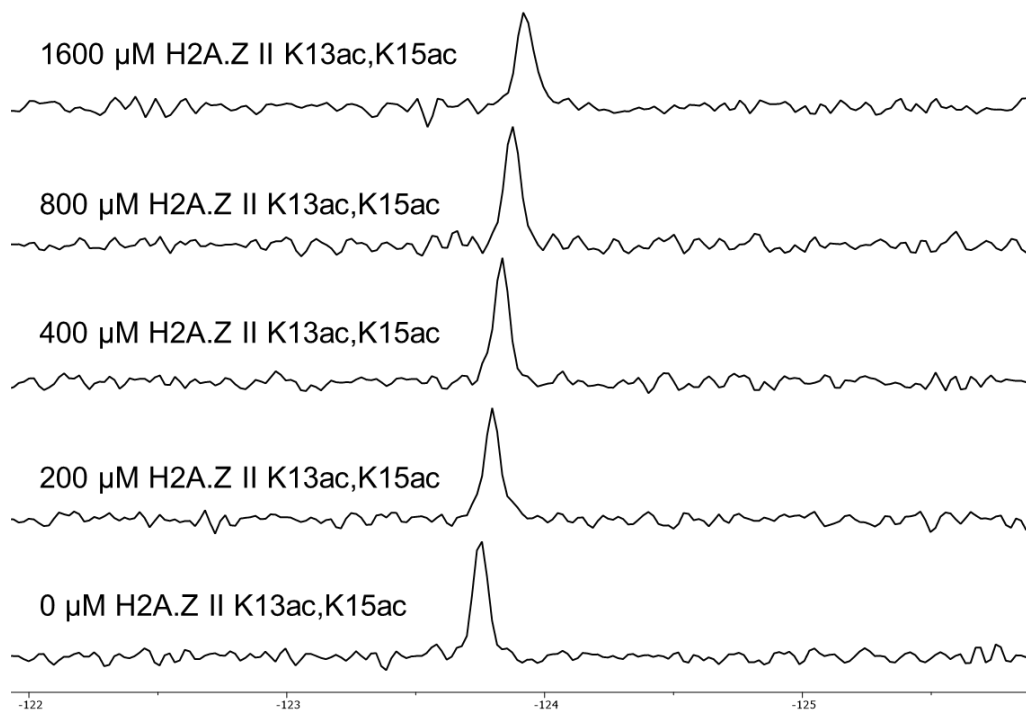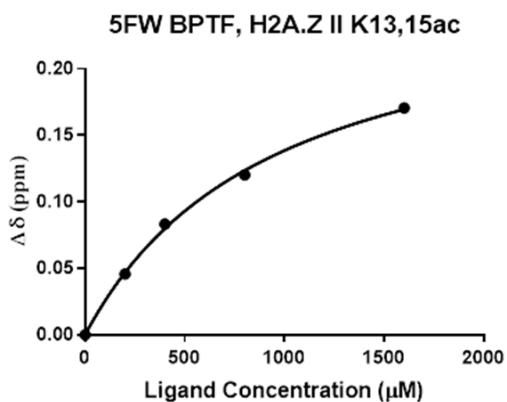

| [Ligand] | 5FW 2950 (ppm) | Δδ      |
|----------|----------------|---------|
| 0 μM     | -123.751       |         |
| 200 μM   | -123.7971      | -0.0461 |
| 400 μM   | -123.8344      | -0.0834 |
| 800 μM   | -123.8746      | -0.1236 |
| 1600 μM  | -123.9208      | -0.1698 |

PrOF NMR titration with 5FW-BPTF and H2A.Z II K4ac,K7ac,K11ac peptide.

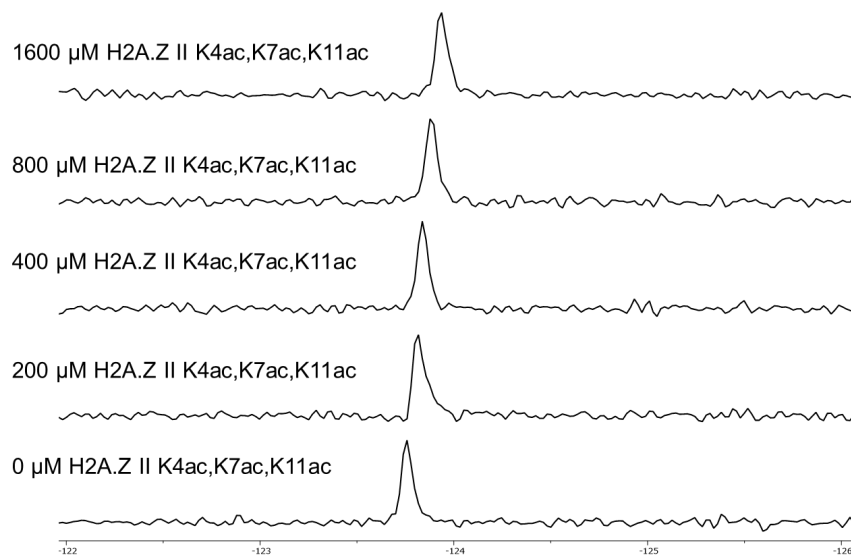

**5FW BPTF, H2A.Z II K4,7,11ac**

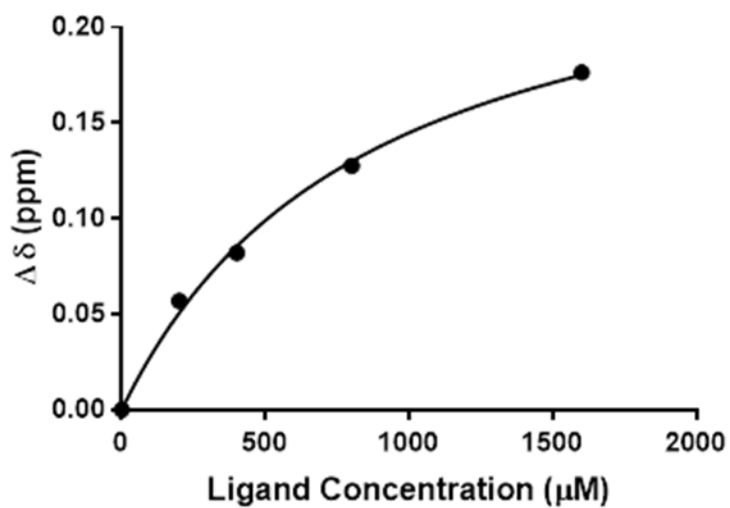

| [Ligand] | 5FW 2950 (ppm) | Δδ      |
|----------|----------------|---------|
| 0 uM     | -123.7561      |         |
| 200 uM   | -123.813       | -0.0569 |
| 400 uM   | -123.8382      | -0.0821 |
| 800 uM   | -123.8837      | -0.1276 |
| 1600 uM  | -123.9326      | -0.1765 |

PrOF NMR titration with 5FW-BPTF and H2A.Z II K7ac,K13ac,K15ac peptide.

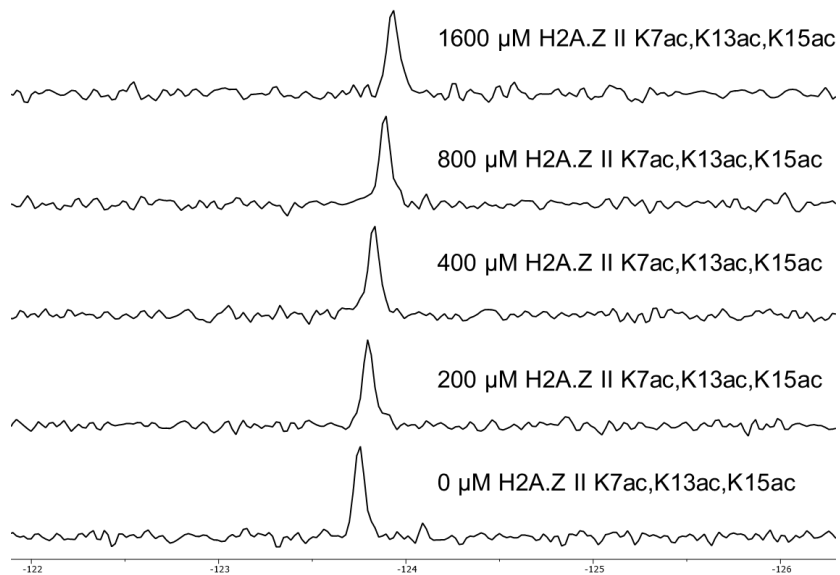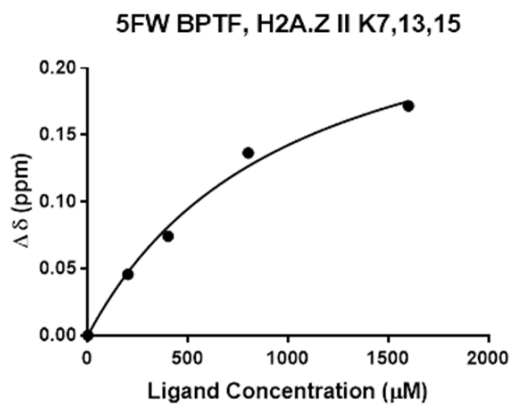

| [Ligand] | 5FW 2950 (ppm) | Δδ      |
|----------|----------------|---------|
| 0 μM     | -123.7516      |         |
| 200 μM   | -123.7976      | -0.046  |
| 400 μM   | -123.8286      | -0.077  |
| 800 μM   | -123.8885      | -0.1369 |
| 1600 μM  | -123.929       | -0.1774 |

PrOF NMR titration with 5FW-BPTF and H2A.Z II K4me,K7ac,K13ac peptide.

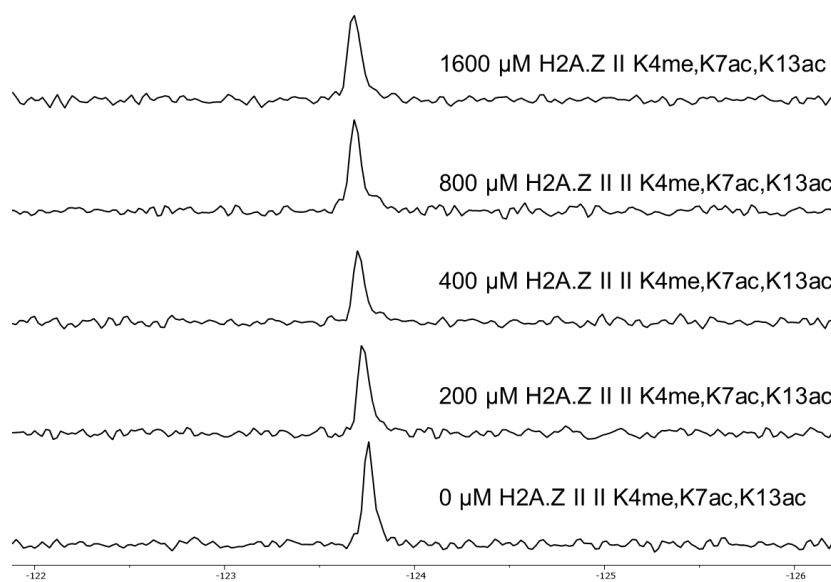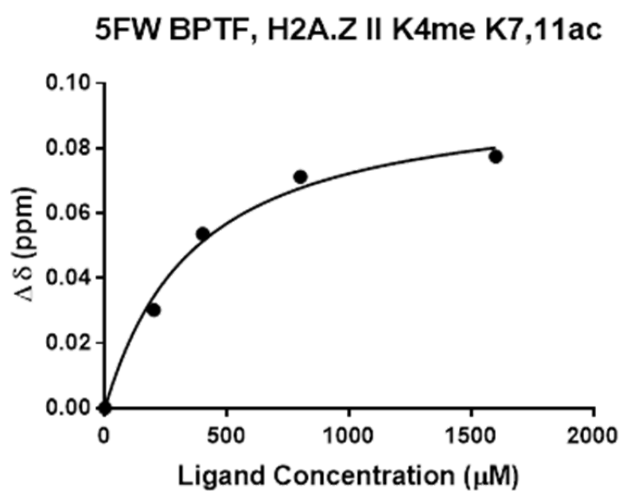

| [Ligand]           | 5FW 2950 (ppm) | $\Delta\delta$ |
|--------------------|----------------|----------------|
| 0 $\mu\text{M}$    | -123.7566      |                |
| 200 $\mu\text{M}$  | -123.7264      | 0.0302         |
| 400 $\mu\text{M}$  | -123.703       | 0.0536         |
| 800 $\mu\text{M}$  | -123.6854      | 0.0712         |
| 1600 $\mu\text{M}$ | -123.6791      | 0.0775         |

PrOF NMR titration with 5FW-BPTF and H2A.Z I K4ac,K11ac peptide.

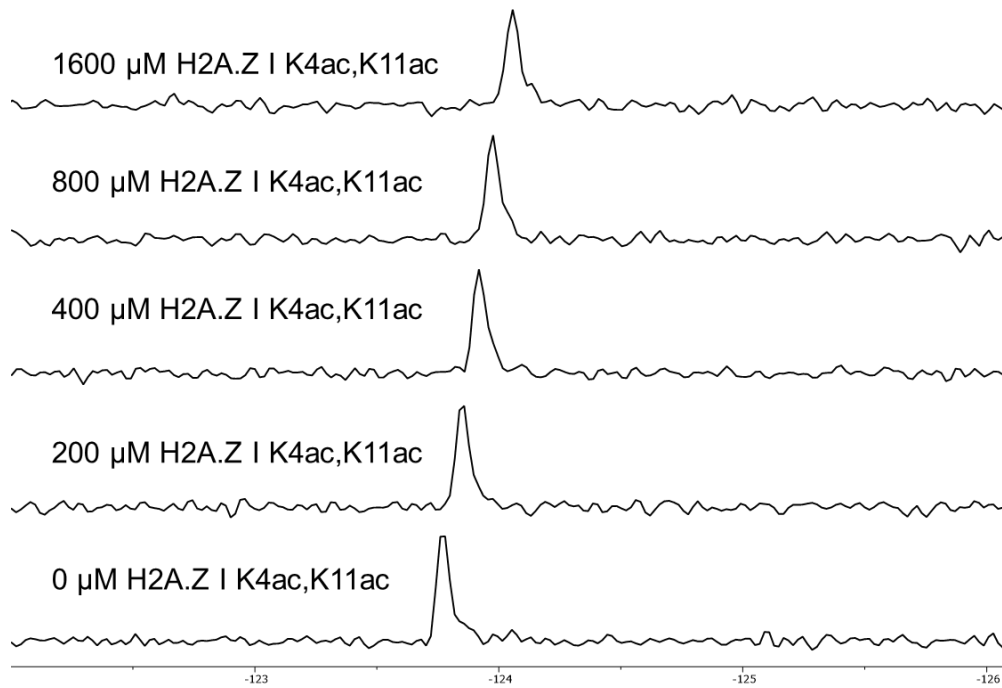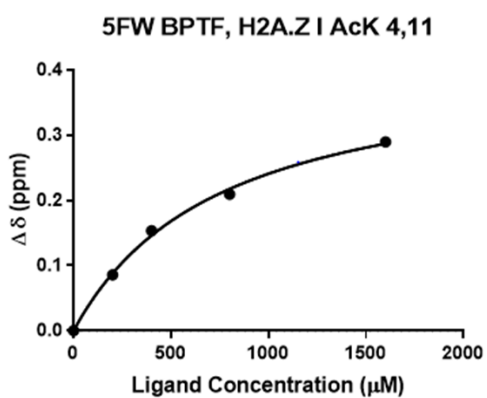

| [Ligand] | 5FW 2950 (ppm) | Δδ     |
|----------|----------------|--------|
| 0 μM     | -123.763       |        |
| 200 μM   | -123.848       | -0.085 |
| 400 μM   | -123.916       | -0.153 |
| 800 μM   | -123.972       | -0.209 |
| 1600 μM  | -124.052       | -0.289 |

PrOF NMR titration with 5FW-BPTF and H2A.Z I K4ac,K13ac peptide.

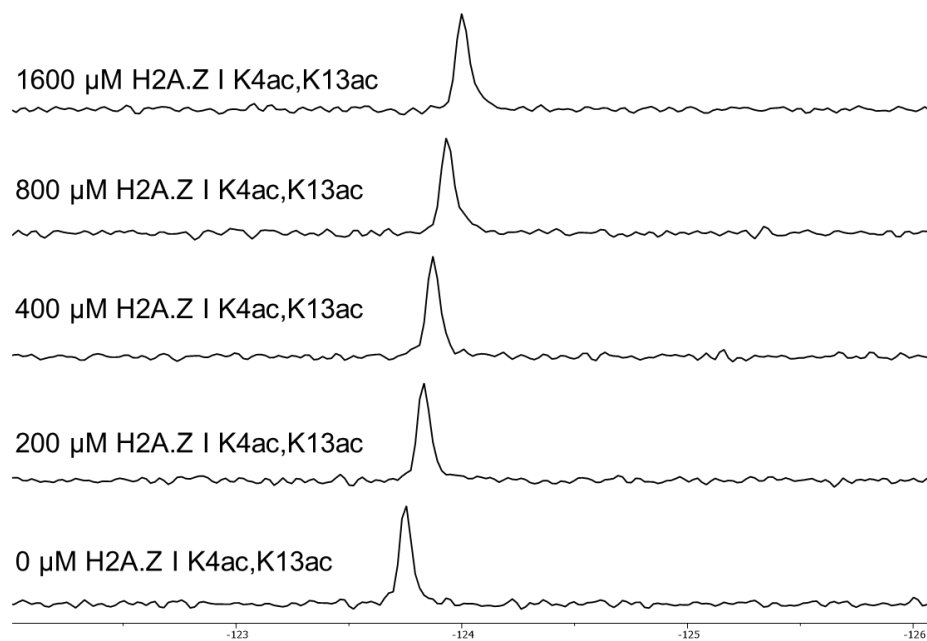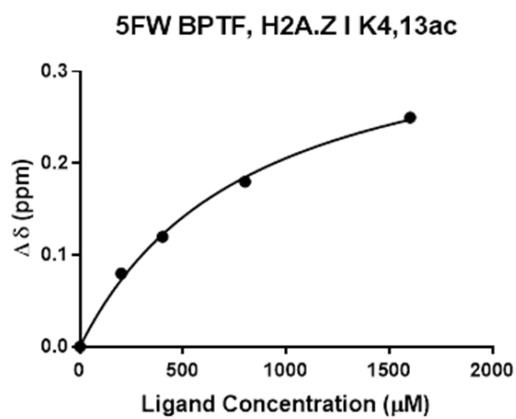

| [Ligand] | 5FW 2950 (ppm) | Δδ    |
|----------|----------------|-------|
| 0 uM     | -123.75        |       |
| 200 uM   | -123.83        | -0.08 |
| 400 uM   | -123.87        | -0.12 |
| 800 uM   | -123.93        | -0.18 |
| 1600 uM  | -124           | -0.25 |

PrOF NMR titration with 5FW-BPTF and H2A.Z I K4ac,K15ac peptide.

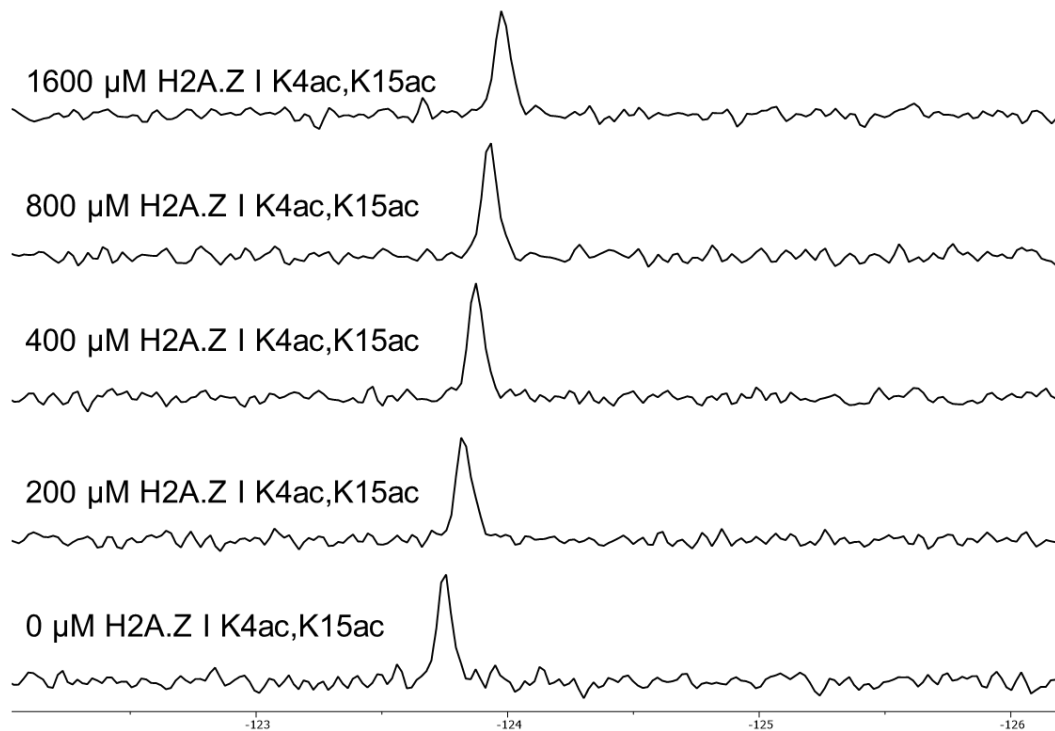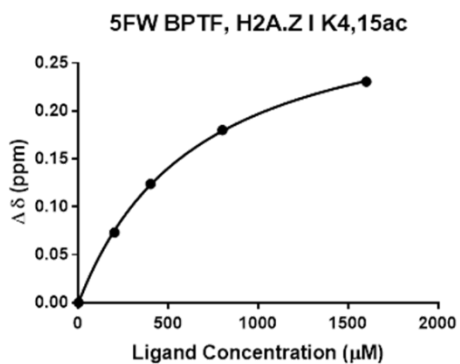

| [Ligand] | 5FW 2950 (ppm) | Δδ      |
|----------|----------------|---------|
| 0 μM     | -123.7488      |         |
| 200 μM   | -123.8212      | -0.0724 |
| 400 μM   | -123.8725      | -0.1237 |
| 800 μM   | -123.9277      | -0.1789 |
| 1600 μM  | -123.9772      | -0.2284 |

PrOF NMR titration with 5FW-BPTF and H2A.Z I K7ac,K13ac peptide.

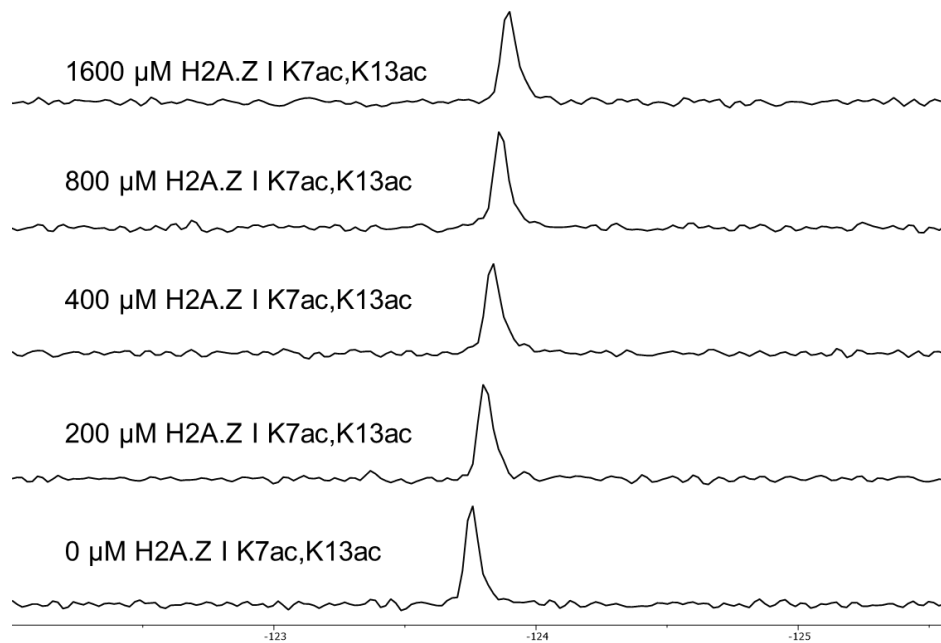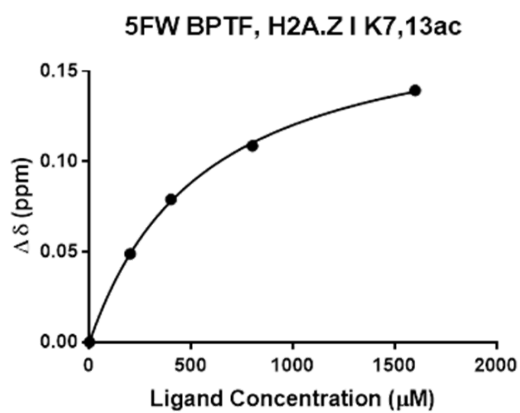

| [Ligand] | 5FW 2950 (ppm) | Δδ      |
|----------|----------------|---------|
| 0 uM     | -123.7546      |         |
| 200 uM   | -123.8035      | -0.0489 |
| 400 uM   | -123.8337      | -0.0791 |
| 800 uM   | -123.8633      | -0.1087 |
| 1600 uM  | -123.894       | -0.1394 |



PrOF NMR titration with 5FW-BPTF and H2A.Z I K7ac,K15ac peptide.

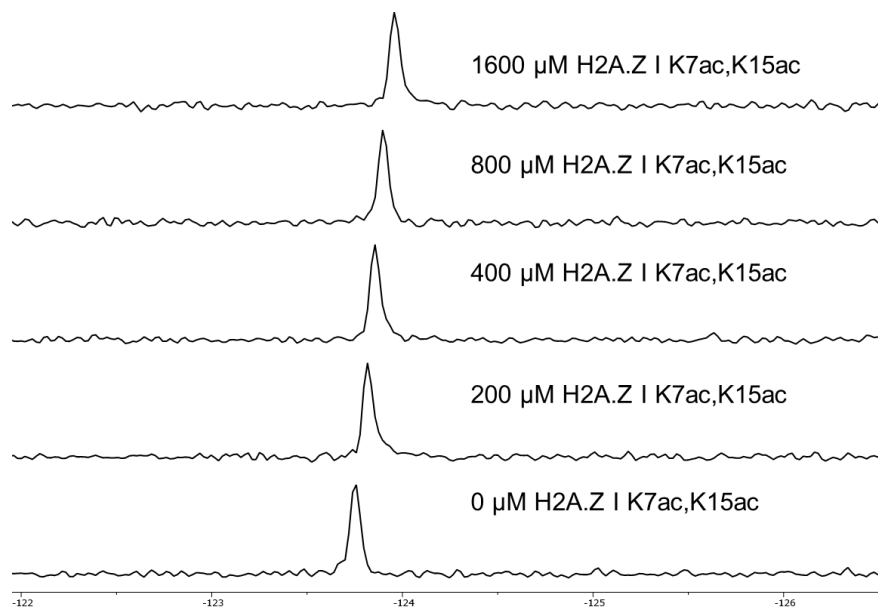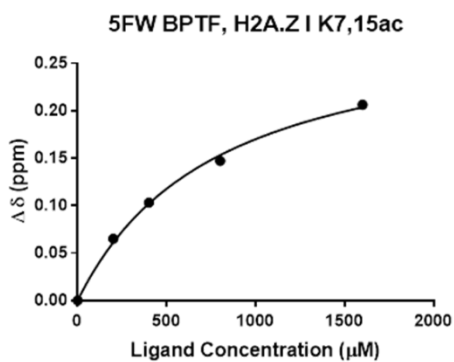

| [Ligand] | 5FW 2950 (ppm) | Δδ      |
|----------|----------------|---------|
| 0 uM     | -123.7521      |         |
| 200 uM   | -123.8173      | -0.0652 |
| 400 uM   | -123.8553      | -0.1032 |
| 800 uM   | -123.8992      | -0.1471 |
| 1600 uM  | -123.9584      | -0.2063 |

PrOF NMR titration with 5FW-BPTF and H2A.Z I K11ac,K13ac peptide.

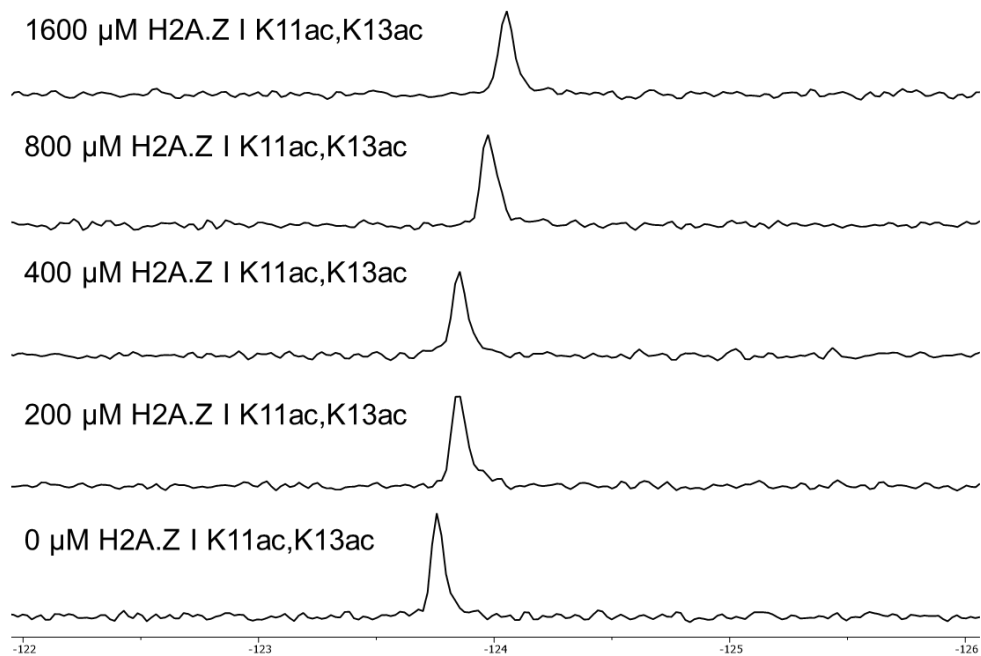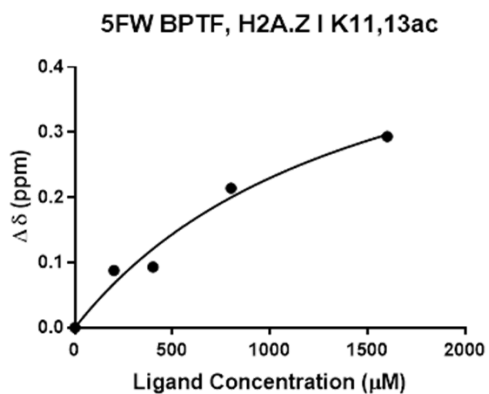

| [Ligand] | 5FW 2950 (ppm) | $\Delta\delta$ |
|----------|----------------|----------------|
| 0 uM     | -123.7581      |                |
| 200 uM   | -123.846       | -0.0879        |
| 400 uM   | -123.8513      | -0.0932        |
| 800 uM   | -123.9722      | -0.2141        |
| 1600 uM  | -124.0517      | -0.2936        |

PrOF NMR titration with 5FW-BPTF and H2A.Z I K11ac,K15ac peptide.

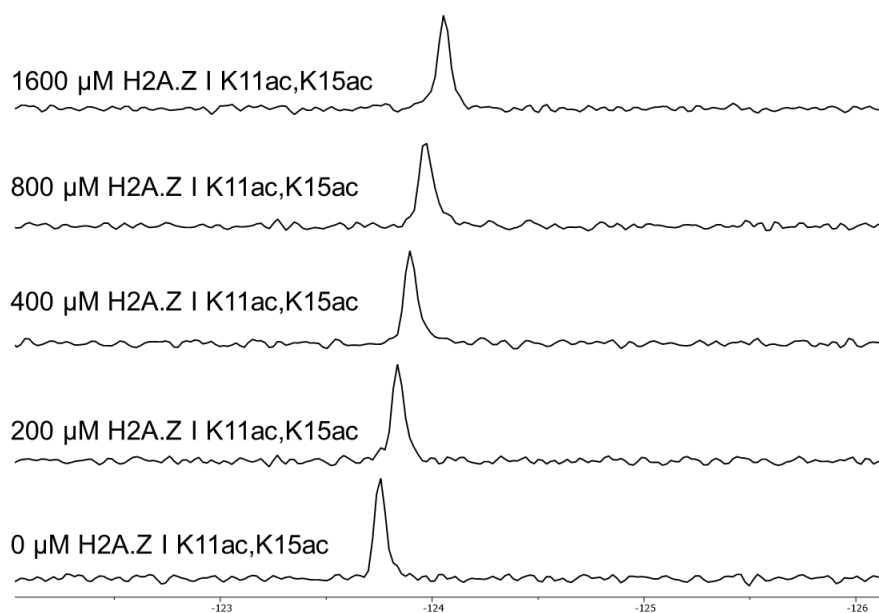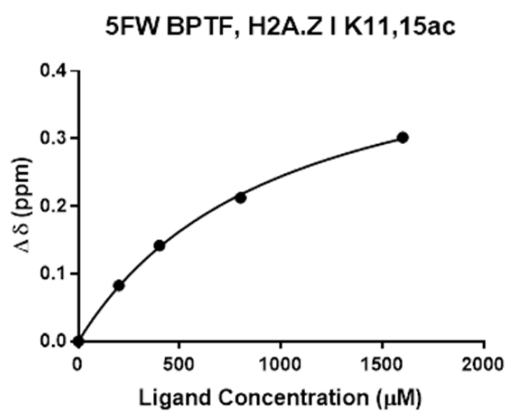

| [Ligand] | 5FW 2950 (ppm) | Δδ      |
|----------|----------------|---------|
| 0 uM     | -123.754       |         |
| 200 uM   | -123.8369      | -0.0829 |
| 400 uM   | -123.896       | -0.142  |
| 800 uM   | -123.9665      | -0.2125 |
| 1600 uM  | -124.0557      | -0.3017 |

PrOF NMR titration with 5FW-BPTF and H2A.Z I K13ac,K15ac peptide.

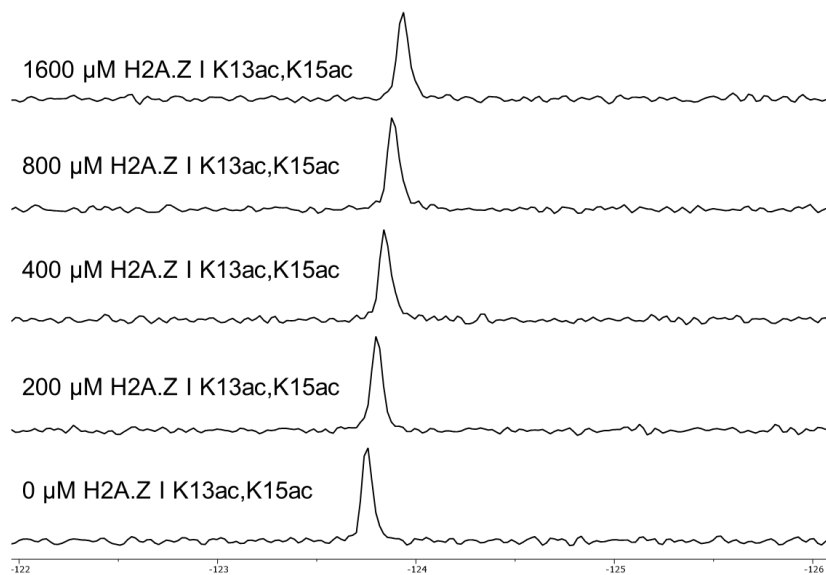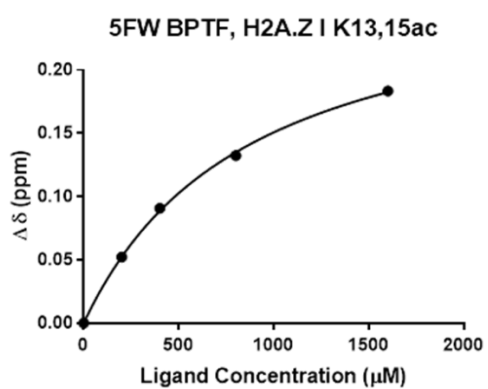

| [Ligand]           | 5FW 2950 (ppm) | $\Delta\delta$ |
|--------------------|----------------|----------------|
| 0 $\mu\text{M}$    | -123.75        |                |
| 200 $\mu\text{M}$  | -123.8022      | -0.0522        |
| 400 $\mu\text{M}$  | -123.8407      | -0.0907        |
| 800 $\mu\text{M}$  | -123.8824      | -0.1324        |
| 1600 $\mu\text{M}$ | -123.9334      | -0.1834        |

PrOF NMR titration with 5FW-BPTF and H2A.Z I K7ac,K13ac,K15ac peptide.

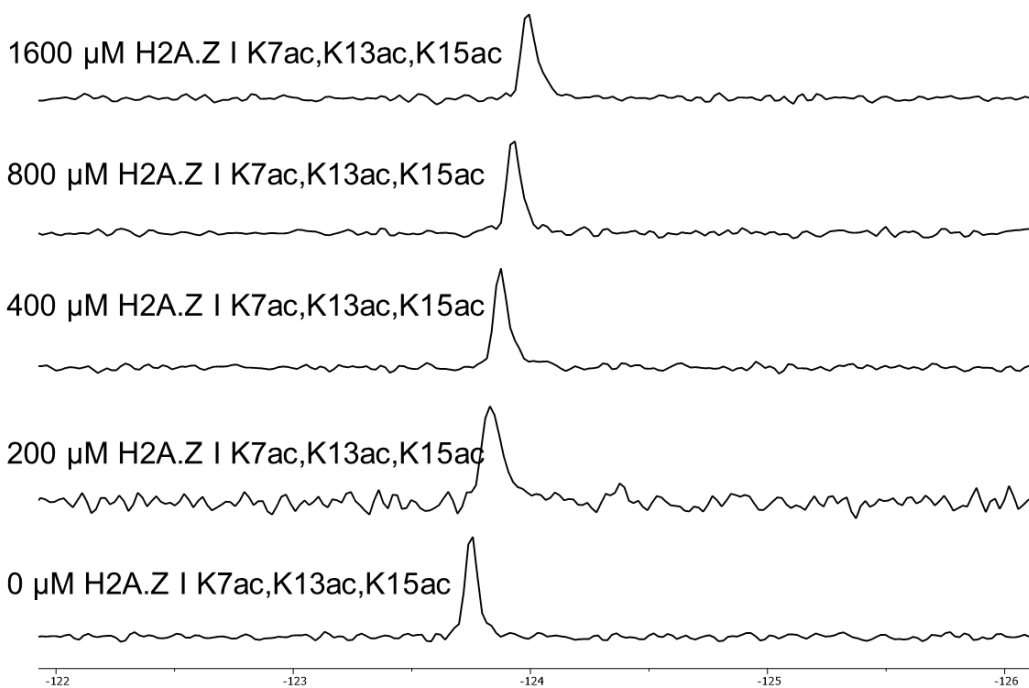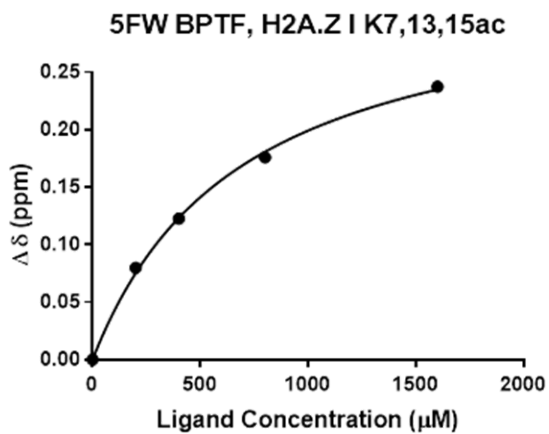

| [Ligand] | 5FW 2950 (ppm) | Δδ      |
|----------|----------------|---------|
| 0 uM     | -123.7509      |         |
| 200 uM   | -123.8308      | -0.0799 |
| 400 uM   | -123.8734      | -0.1225 |
| 800 uM   | -123.9269      | -0.176  |
| 1600 uM  | -123.9882      | -0.2373 |

## Bromodomain Scope PrOF NMR Titrations.

PrOF NMR titration with 5FW PCAF and H2A.Z I K7ac,K13ac peptide.

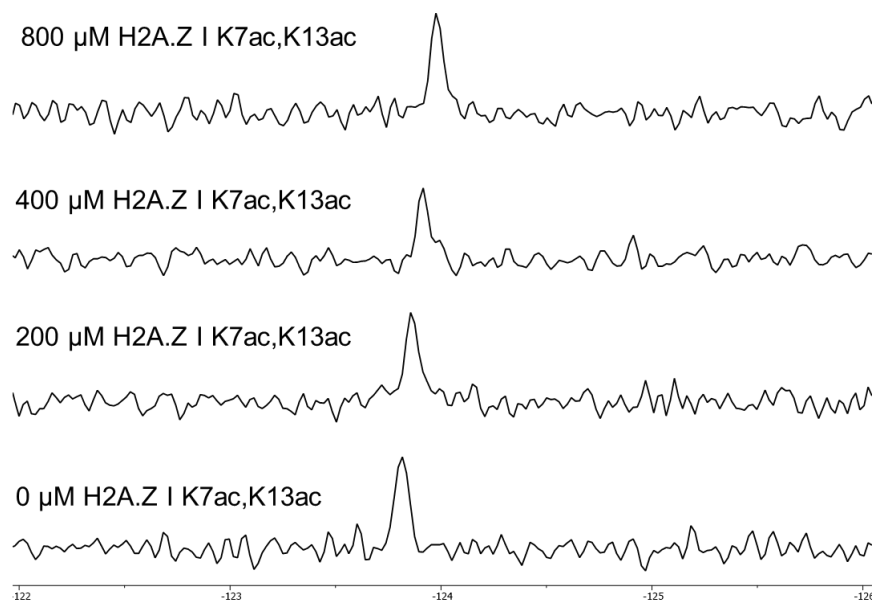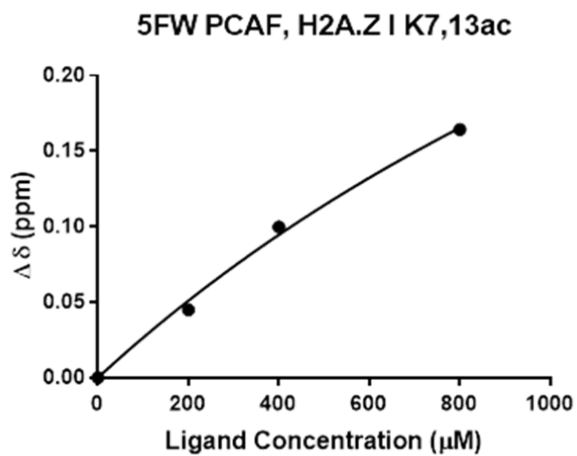

| [Ligand]          | 5FW 746 (ppm) | $\Delta\delta$ |
|-------------------|---------------|----------------|
| 0 $\mu\text{M}$   | -123.8146     |                |
| 200 $\mu\text{M}$ | -123.8598     | -0.0452        |
| 400 $\mu\text{M}$ | -123.9129     | -0.0983        |
| 800 $\mu\text{M}$ | -123.9782     | -0.1636        |

PrOF NMR titration with 5FW PCAF and H2A.Z II K7ac,K13ac peptide.

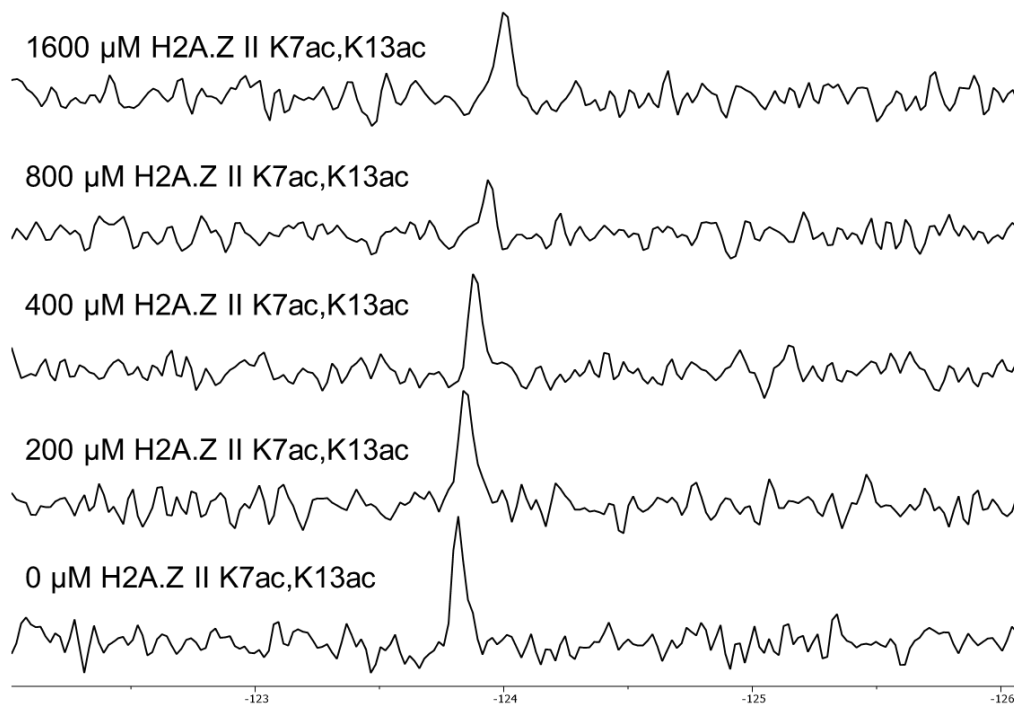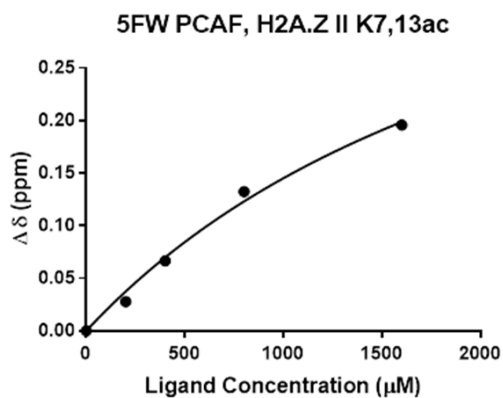

| [Ligand] | 5FW 746 (ppm) | Δδ      |
|----------|---------------|---------|
| 0 μM     | -123.8154     |         |
| 200 μM   | -123.8449     | -0.0295 |
| 400 μM   | -123.8821     | -0.0667 |
| 800 μM   | -123.9398     | -0.1244 |
| 1600 μM  | -124.0036     | -0.1882 |

PrOF NMR titration with 5FW CECR2 and H2A.Z I K7ac,K13ac peptide.

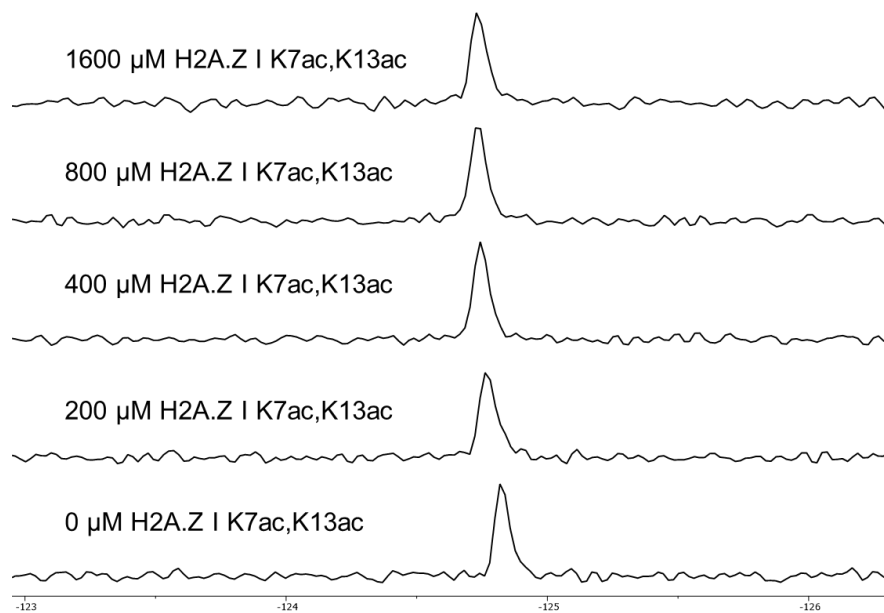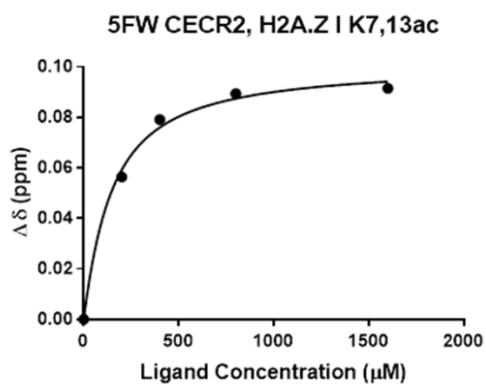

| [Ligand] | 5FW 457 (ppm) | Δδ     |
|----------|---------------|--------|
| 0 uM     | -124.8233     |        |
| 200 uM   | -124.7669     | 0.0564 |
| 400 uM   | -124.7442     | 0.0791 |
| 800 uM   | -124.7339     | 0.0894 |
| 1600 uM  | -124.7318     | 0.0915 |



PrOF NMR titration with 5FW CECR2 and H2A.Z II K7ac,K13ac peptide.

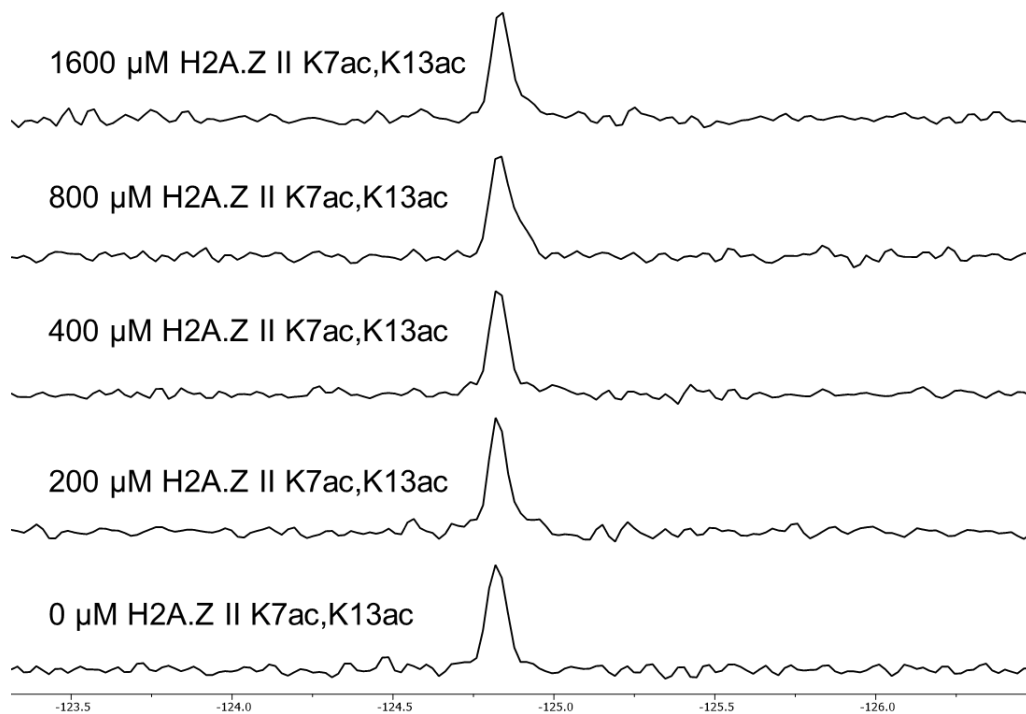

5FW CECR2, H2A.Z II K7,13ac

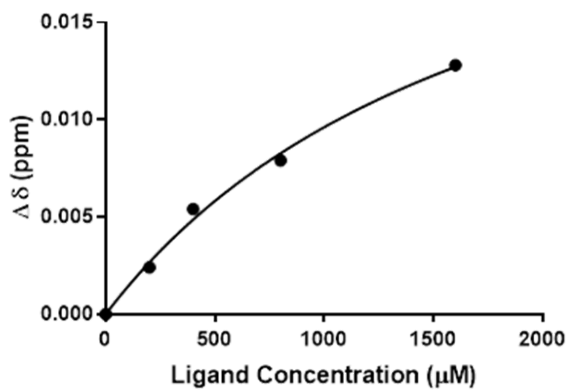

| [Ligand] | 5FW 457 (ppm) | Δδ      |
|----------|---------------|---------|
| 0 uM     | -124.8211     |         |
| 200 uM   | -124.8235     | -0.0024 |
| 400 uM   | -124.8265     | -0.0054 |
| 800 uM   | -124.829      | -0.0079 |
| 1600 uM  | -124.8339     | -0.0128 |

PrOF NMR titration with 5FW BRD2(1) and H2A.Z I K7ac,K13ac peptide.

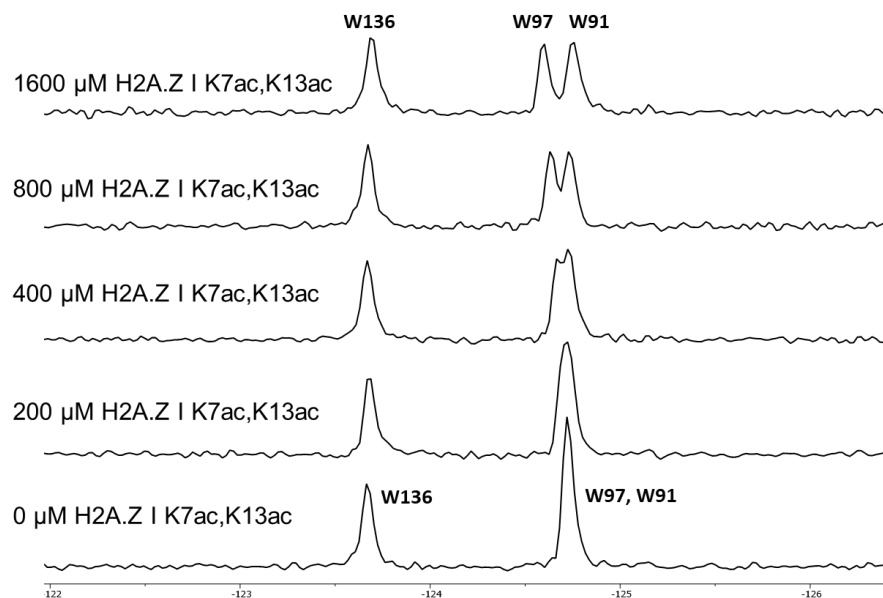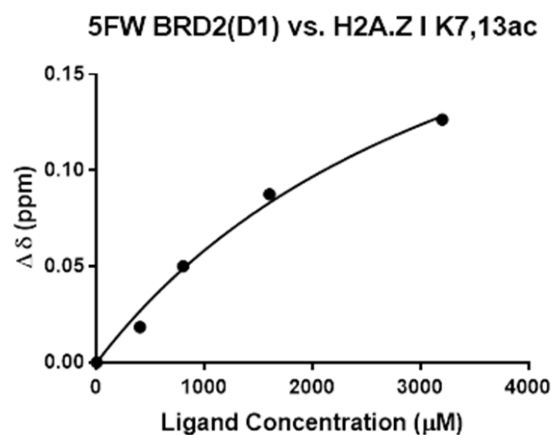

| [Ligand] | 5FW 97 (ppm) | Δδ     |
|----------|--------------|--------|
| 0 uM     | -124.7226    |        |
| 400 uM   | -124.7041    | 0.0185 |
| 800 uM   | -124.6725    | 0.0501 |
| 1600 uM  | -124.635     | 0.0876 |
| 3200 uM  | -124.5961    | 0.1265 |

PrOF NMR titration with 5FW BRD2(1) and H2A.Z II K7ac,K13ac peptide.

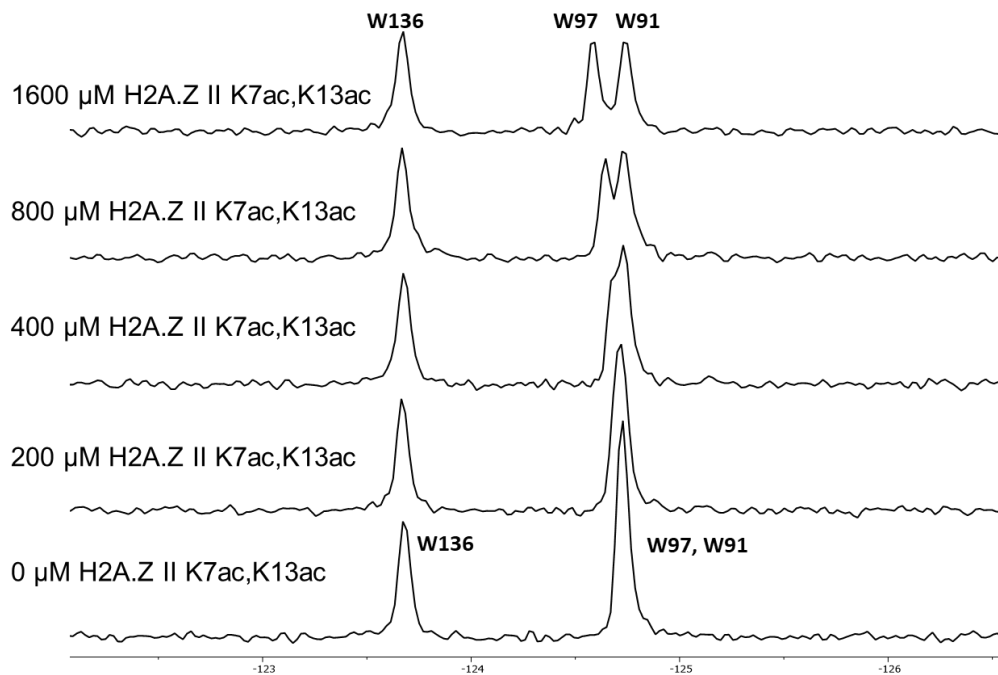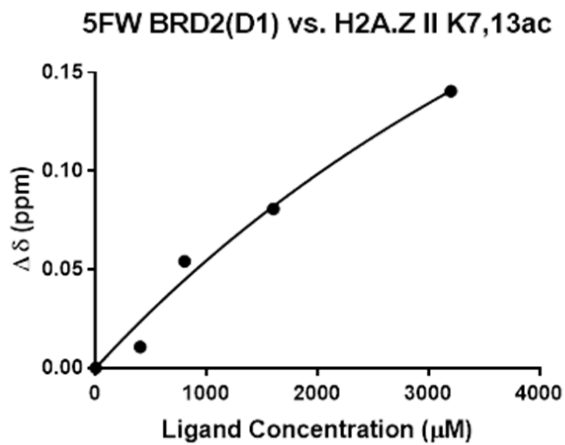

| [Ligand] | 5FW 97 (ppm) | Δδ     |
|----------|--------------|--------|
| 0 uM     | -124.7249    |        |
| 400 uM   | -124.7142    | 0.0107 |
| 800 uM   | -124.6707    | 0.0542 |
| 1600 uM  | -124.6441    | 0.0808 |
| 3200 uM  | -124.5843    | 0.1406 |

PrOF NMR titration with 5FW BRD2(D2) and H2A.Z I K7ac,K13ac peptide.

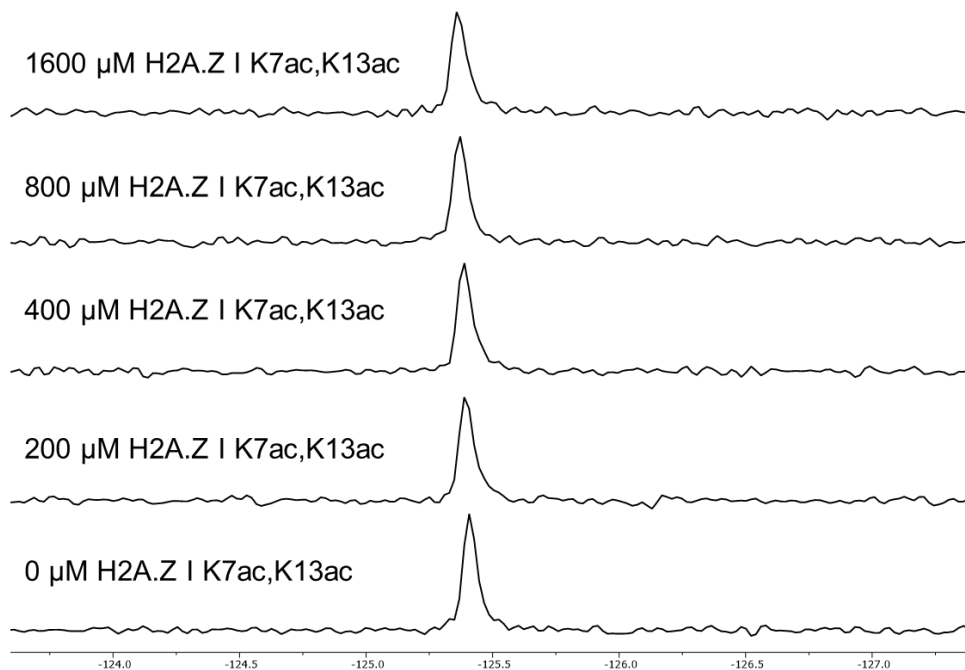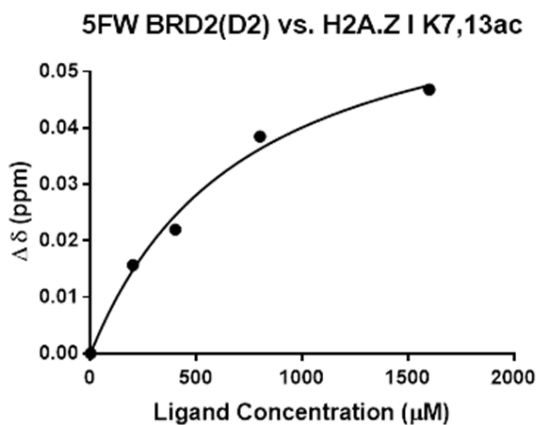

| [Ligand]           | 5FW 370 (ppm) | $\Delta\delta$ |
|--------------------|---------------|----------------|
| 0 $\mu\text{M}$    | -125.4084     |                |
| 200 $\mu\text{M}$  | -125.3927     | 0.0157         |
| 400 $\mu\text{M}$  | -125.3864     | 0.022          |
| 800 $\mu\text{M}$  | -125.3699     | 0.0385         |
| 1600 $\mu\text{M}$ | -125.3616     | 0.0468         |

PrOF NMR titration with 5FW BRD2(D2) and H2A.Z II K7ac,K13ac peptide.

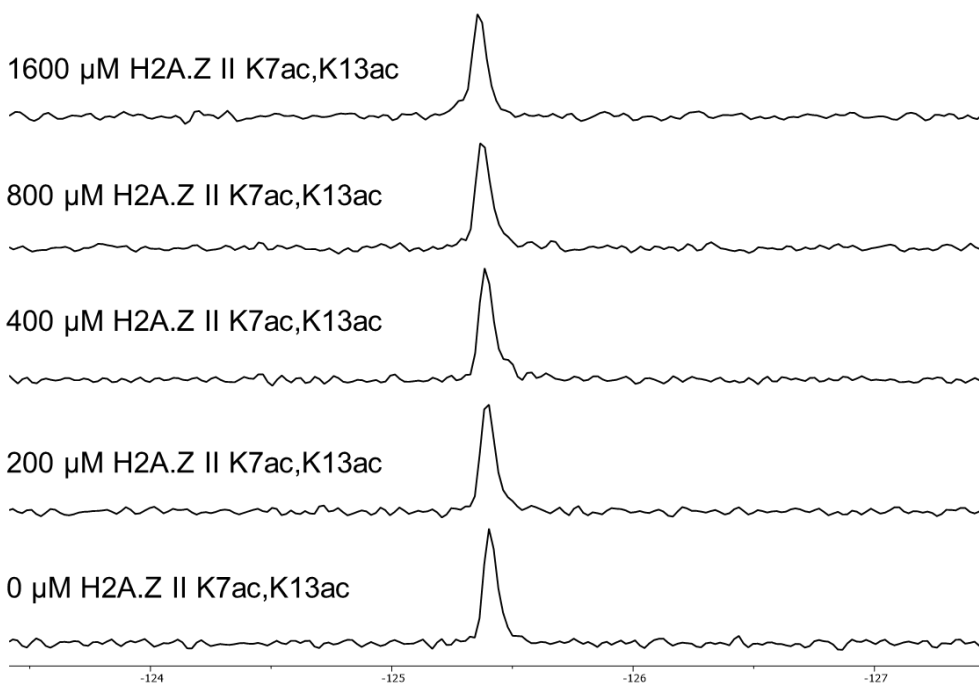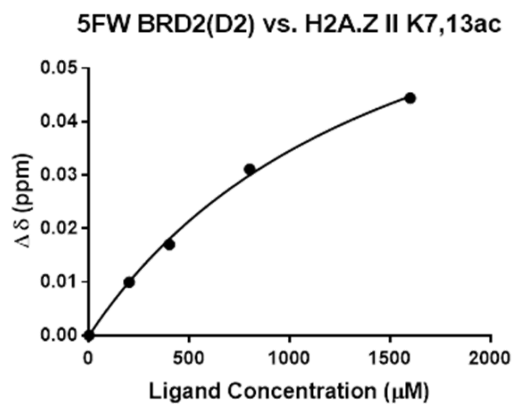

| [Ligand] | 5FW 370 (ppm) | Δδ     |
|----------|---------------|--------|
| 0 uM     | -125.4053     |        |
| 200 uM   | -125.3953     | 0.01   |
| 400 uM   | -125.3883     | 0.017  |
| 800 uM   | -125.3742     | 0.0311 |
| 1600 uM  | -125.3609     | 0.0444 |

PrOF NMR titration with 5FW BRD4(1) and H2A.Z I K7ac,K13ac peptide.

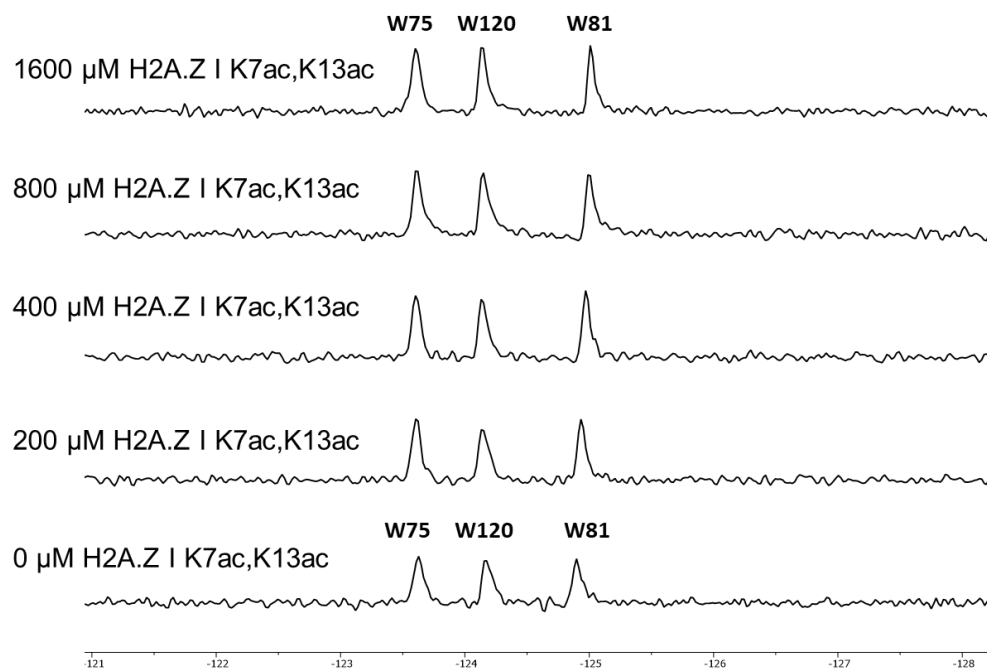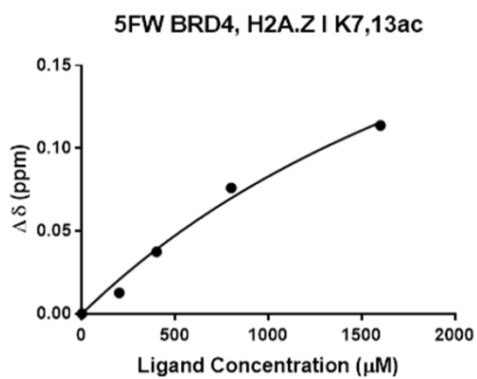

| [Ligand]           | 5FW 81 (ppm) | $\Delta\delta$ |
|--------------------|--------------|----------------|
| 0 $\mu\text{M}$    | -125.0113    |                |
| 200 $\mu\text{M}$  | -124.9986    | 0.0127         |
| 400 $\mu\text{M}$  | -124.9738    | 0.0375         |
| 800 $\mu\text{M}$  | -124.9352    | 0.0761         |
| 1600 $\mu\text{M}$ | -124.8975    | 0.1138         |

PrOF NMR titration with 5FW BRD4(1) and H2A.Z II K7ac,K13ac peptide.

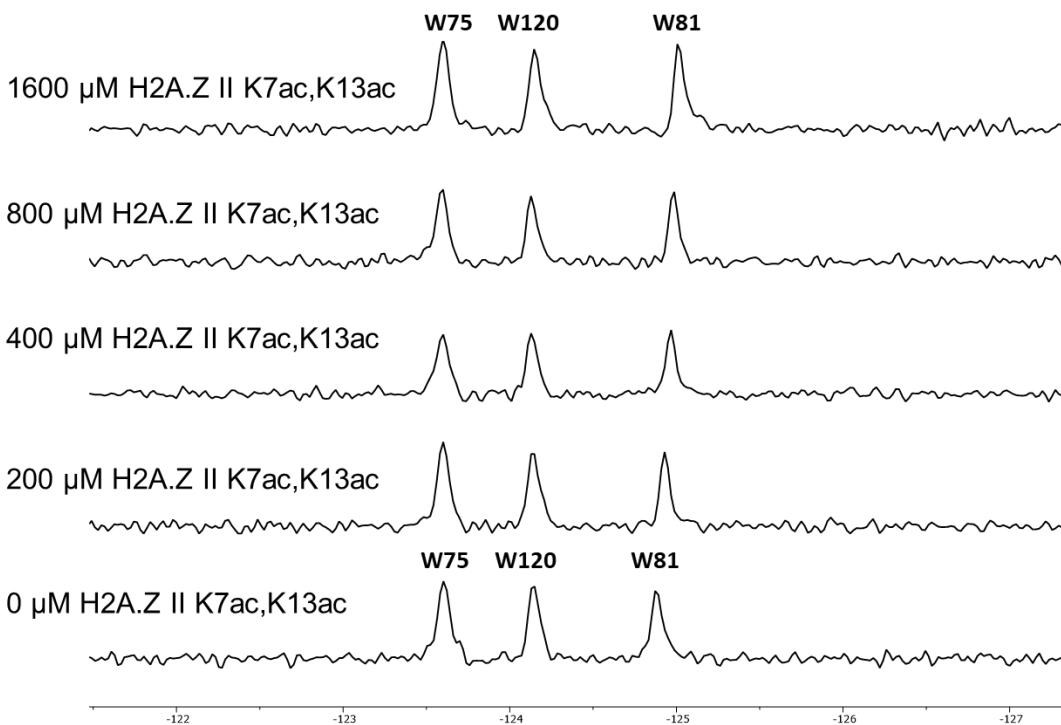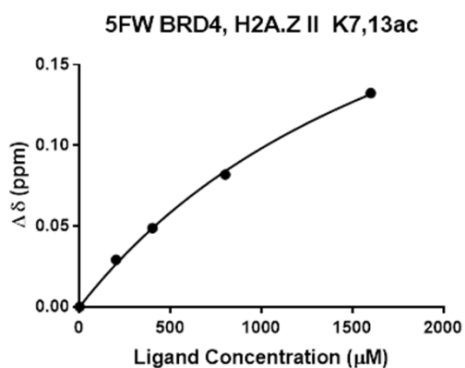

| [Ligand] | 5FW 81 (ppm) | Δδ     |
|----------|--------------|--------|
| 0 uM     | -125.0116    |        |
| 200 uM   | -124.9824    | 0.0292 |
| 400 uM   | -124.9668    | 0.0448 |
| 800 uM   | -124.9296    | 0.082  |
| 1600 uM  | -124.8792    | 0.1324 |

PrOF NMR titration with 5FW BRD4(D2) and H2A.Z I K7ac,K13ac peptide.

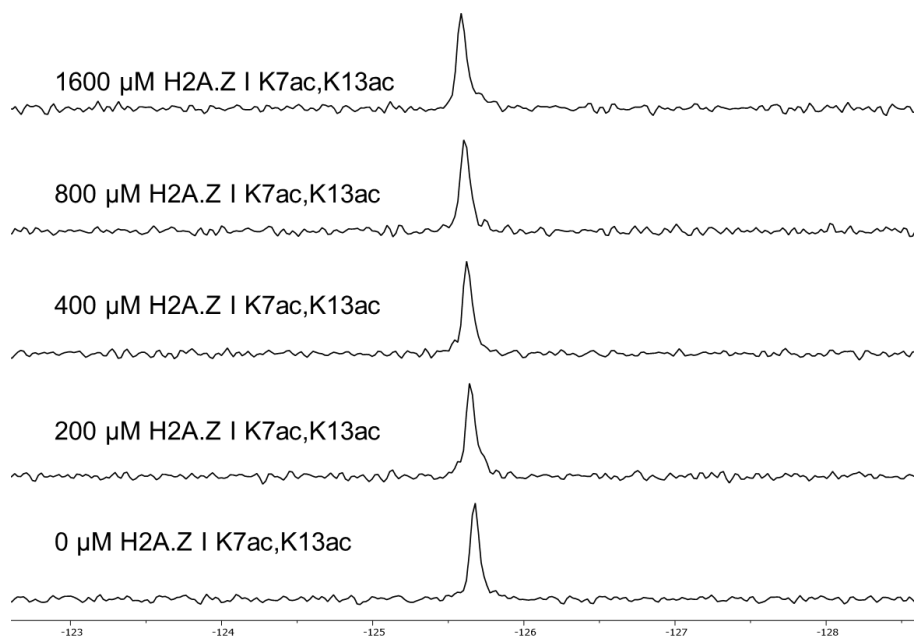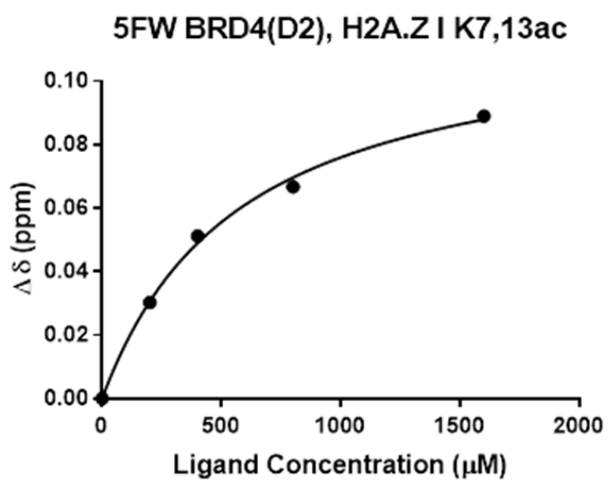

| [Ligand]           | 5FW 374 (ppm) | $\Delta\delta$ |
|--------------------|---------------|----------------|
| 0 $\mu\text{M}$    | -125.6744     |                |
| 200 $\mu\text{M}$  | -125.6441     | 0.0303         |
| 400 $\mu\text{M}$  | -125.6232     | 0.0512         |
| 800 $\mu\text{M}$  | -125.6077     | 0.0667         |
| 1600 $\mu\text{M}$ | -125.5854     | 0.089          |



PrOF NMR titration with 5FW BRD4(D2) and H2A.Z II K7ac,K13ac peptide.

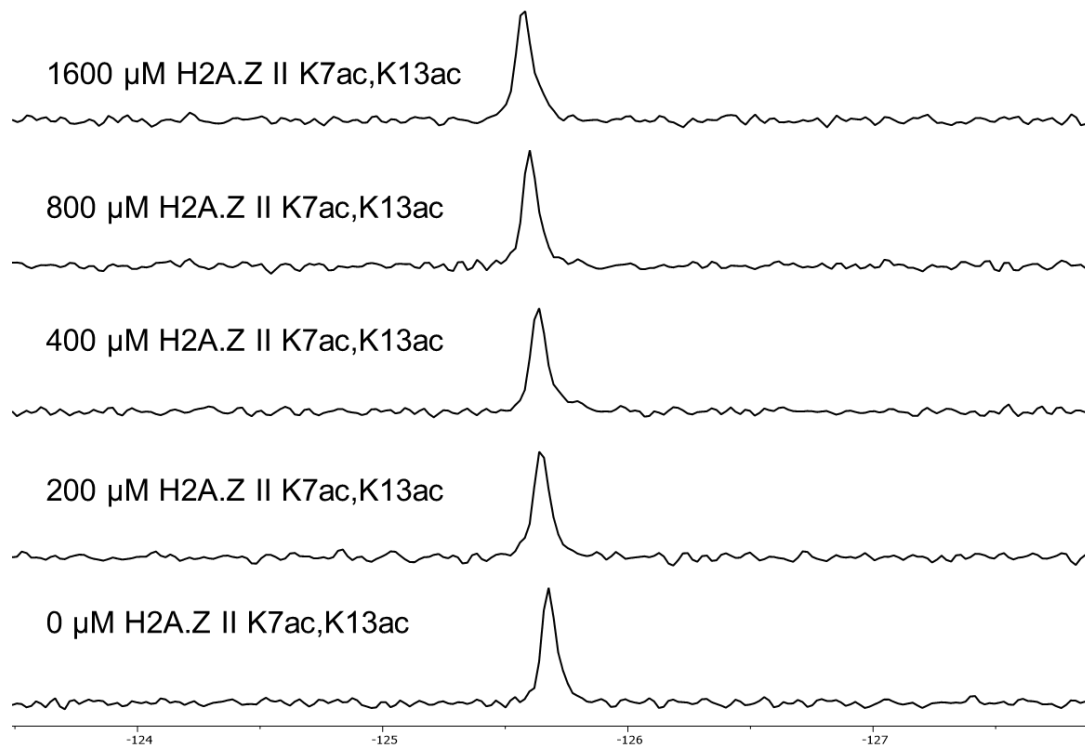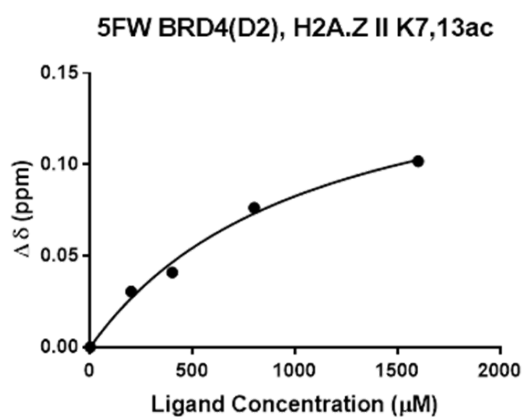

| [Ligand] | 5FW 374 (ppm) | Δδ     |
|----------|---------------|--------|
| 0 uM     | -125.6753     |        |
| 200 uM   | -125.6449     | 0.0304 |
| 400 uM   | -125.6343     | 0.041  |
| 800 uM   | -125.599      | 0.0763 |
| 1600 uM  | -125.5735     | 0.1018 |

PrOF NMR titration with 5FW BRDT(1) and H2A.Z I K7ac,K13ac peptide.

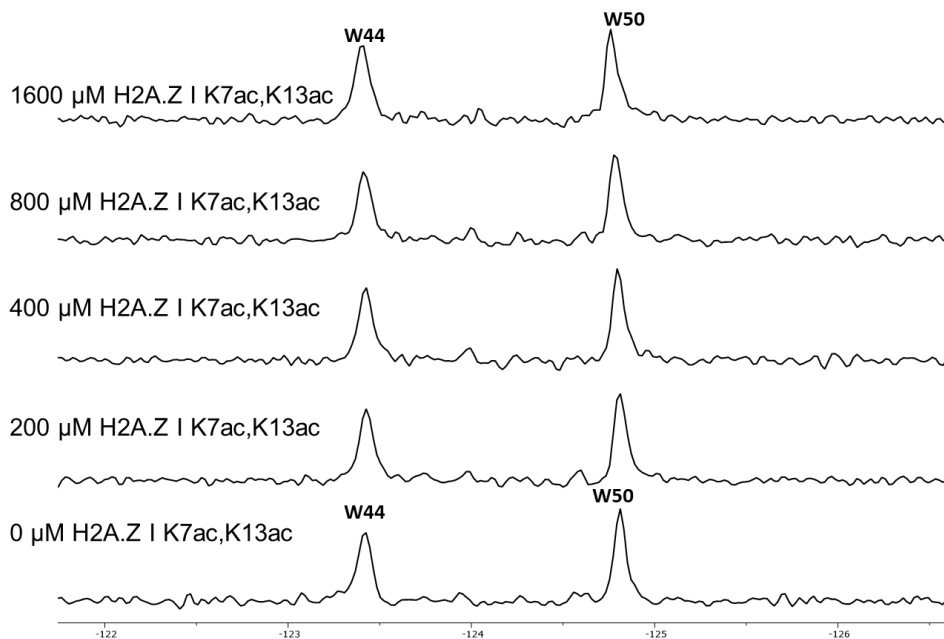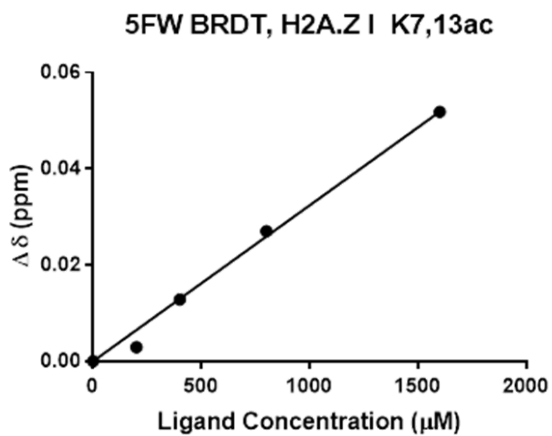

| [Ligand] | 5FW 50 (ppm) | Δδ     |
|----------|--------------|--------|
| 0 uM     | -124.8112    |        |
| 200 uM   | -124.8083    | 0.0029 |
| 400 uM   | -124.7984    | 0.0128 |
| 800 uM   | -124.7842    | 0.027  |
| 1600 uM  | -124.7594    | 0.0518 |

PrOF NMR titration with 5FW BRDT(1) and H2A.Z II K7ac,K13ac peptide.

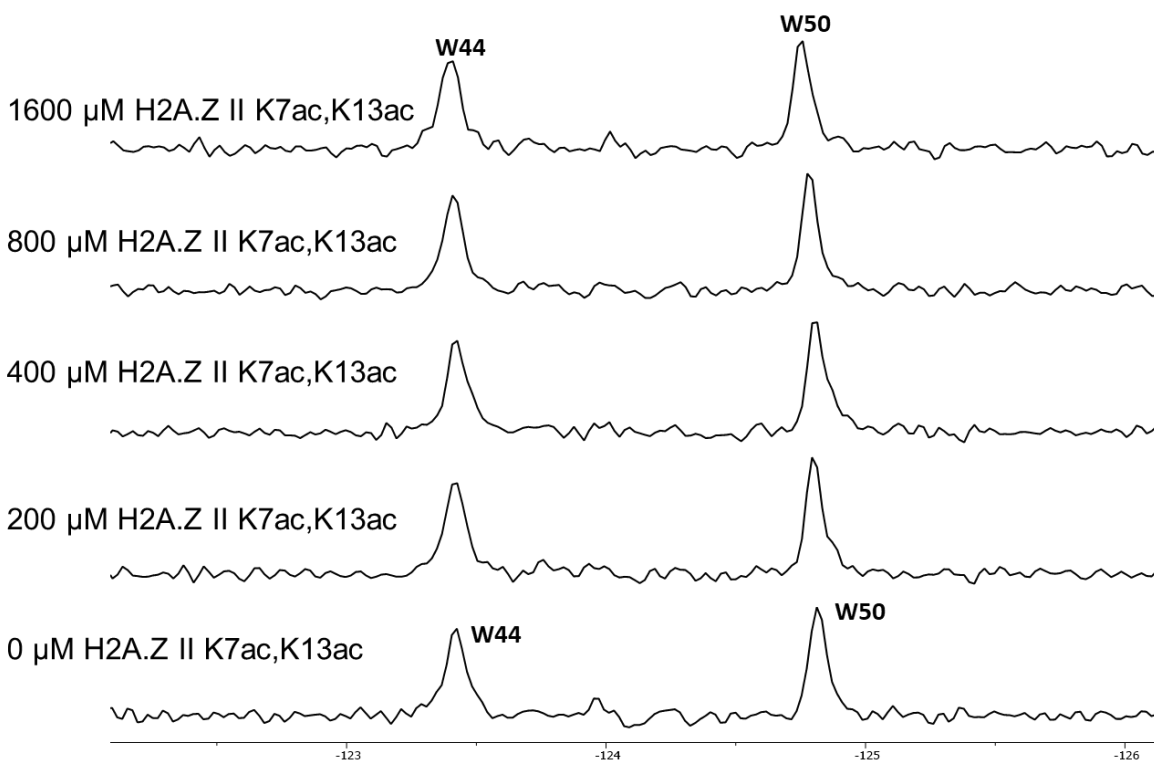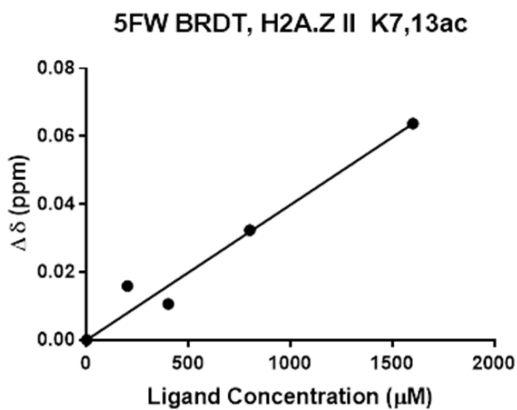

| [Ligand] | 5FW 50 (ppm) | Δδ     |
|----------|--------------|--------|
| 0 uM     | -124.8152    |        |
| 200 uM   | -124.7993    | 0.0159 |
| 400 uM   | -124.8046    | 0.0106 |
| 800 uM   | -124.7828    | 0.0324 |
| 1600 uM  | -124.7514    | 0.0638 |

## REFERENCES

1. Kabsch, W. (2010) Xds. *Acta. Crystallogr. D. Biol. Crystallogr.* 66, 125-32.
2. Adams, P. D.; Afonine, P. V.; Bunkoczi, G.; Chen, V. B.; Davis, I. W.; Echols, N.; Headd, J. J.; Hung, L. W.; Kapral, G. J.; Grosse-Kunstleve, R. W.; McCoy, A. J.; Moriarty, N. W.; Oeffner, R.; Read, R. J.; Richardson, D. C.; Richardson, J. S.; Terwilliger, T. C.; Zwart, P. H. (2010) PHENIX: a comprehensive Python-based system for macromolecular structure solution. *Acta. Crystallogr. D. Biol. Crystallogr.* 66, 213-21.
3. Emsley, P.; Lohkamp, B.; Scott, W. G.; Cowtan, K. (2010) Features and development of Coot. *Crystallogr. D. Biol. Crystallogr.* 66, 486-501.
